# Supplementary material for: Amino Acid Modified RNA Bases as Building Blocks of an Early Earth RNA‐Peptide World
Source: PubMed Central journal article supplement (PMC7756884; doi:10.1002/chem.202002929), 2020-10-14
Supplement: CHEM-26-14856-s001.pdf [file CHEM-26-14856-s001.pdf]

# Chemistry–A European Journal

Supporting Information

## **Amino Acid Modified RNA Bases as Building Blocks of an Early Earth RNA-Peptide World**

Milda Nainytė,<sup>[a]</sup> Felix Müller,<sup>[a]</sup> Giacomo Ganazzoli,<sup>[a]</sup> Chun-Yin Chan,<sup>[a]</sup> Antony Crisp,<sup>[a]</sup>  
Daniel Globisch,<sup>[b]</sup> and Thomas Carell\*<sup>[a]</sup>

|                                                                  |    |
|------------------------------------------------------------------|----|
| <i>1. General Experimental Methods</i> .....                     | 2  |
| <i>2. Synthesis of the Phosphoramidite Building-Blocks</i> ..... | 3  |
| 2.1. Synthesis of RNA building blocks.....                       | 3  |
| 2.2. Synthesis of DNA building block .....                       | 34 |
| <i>3. Synthesis and Purification of Oligonucleotides</i> .....   | 38 |
| <i>4. UV Melting Curve Measurements</i> .....                    | 42 |
| <i>5. NMR spectra</i> .....                                      | 43 |
| <i>6. References</i> .....                                       | 88 |

## 1. General Experimental Methods

Chemicals were purchased from Sigma-Aldrich, TCI, Fluka, ABCR, Carbosynth or Acros Organics and used without further purification. Some of the strands were purchased from Metabion or Ella Biotech. Reagent-grade dry solvents (Sigma-Aldrich, Acros Organics) were stored over molecular sieves and handled under inert gas atmosphere. Reactions and chromatography fractions were monitored by qualitative thin-layer chromatography (TLC) on silica gel F254 TLC plates from Merck KGaA. Flash column chromatography was performed on Geduran® Si60 (40-63  $\mu\text{m}$ ) silica gel from Merck KGaA. NMR spectra were recorded on Bruker AVIIIHD 400 spectrometers (400 MHz).  $^1\text{H}$  NMR shifts were calibrated to the residual solvent resonances: DMSO- $d_6$  (2.50 ppm),  $\text{CDCl}_3$  (7.26 ppm), Acetone- $d_6$  (2.05 ppm),  $\text{CD}_2\text{Cl}_2$  (5.32 ppm).  $^{13}\text{C}$  NMR shifts were calibrated to the residual solvent: DMSO- $d_6$  (39.52 ppm),  $\text{CDCl}_3$  (77.16 ppm), Acetone- $d_6$  (29.84 ppm),  $\text{CD}_2\text{Cl}_2$  (53.84 ppm). All NMR spectra were analysed using the program MestreNova 10.0.1 from Mestrelab Research S. L. High resolution mass spectra were measured by the analytical section of the Department of Chemistry of the Ludwigs-Maximilians-Universität München on the spectrometer MAT 90 (ESI) from Thermo Finnigan GmbH. IR spectra were recorded on a PerkinElmer Spectrum BX II FT-IR system. All substances were directly applied as solids or on the ATR unit. Analytical RP-HPLC was performed on an analytical HPLC Waters Alliance (2695 Separation Module, 2996 Photodiode Array Detector) equipped with the column Nucleosil 120-2 C18 from Macherey Nagel using a flow of 0.5 ml/min, a gradient of 0-30% of buffer B in 45 min was applied. Preparative RP-HPLC was performed on a HPLC Waters Breeze (2487 Dual  $\lambda$  Array Detector, 1525 Binary HPLC Pump) equipped with the column VP 250/32 C18 from Macherey Nagel using a flow of 5 ml/min, a gradient of 0-25% of buffer B in 45 min was applied for the purifications. Oligonucleotides were purified using the following buffer system: buffer A: 100 mM  $\text{NEt}_3/\text{HOAc}$  (pH 7.0) in  $\text{H}_2\text{O}$  and buffer B: 100 mM  $\text{NEt}_3/\text{HOAc}$  in 80% (v/v) acetonitrile. The pH values of buffers were adjusted using a MP 220 pH-meter (Mettler Toledo). Oligonucleotides were detected at wavelength: 260 nm. Melting profiles were measured on a JASCO V-650 spectrometer. Calculation of concentrations was assisted using the software OligoAnalyzer 3.0 (Integrated DNA Technologies: <https://eu.idtdna.com/calc/analyzer>). For strands containing artificial bases, the extinction coefficient of their corresponding canonical-only strand was employed without corrections. Matrix-assisted laser desorption/ionization-time-of-flight (MALDI-TOF) mass spectra were recorded on a Bruker Autoflex II. For MALDI-TOF

measurements, the samples were desalted on a 0.025  $\mu\text{m}$  VSWP filter (Millipore) against ddH<sub>2</sub>O and co-crystallized in a 3-hydroxypicolinic acid matrix (HPA).

## 2. Synthesis of the Phosphoramidite Building-Blocks

### 2.1. Synthesis of RNA building blocks

#### Npe-protection of carboxy group of amino acid

The reaction was performed according to the procedure published before.<sup>1</sup>

L-amino acid (1 eq.), 2-(4-nitrophenyl)ethanol (npe-OH, 3 eq.) and TsOH (3 eq.) were refluxed in toluene overnight in a *Dean-Stark* apparatus. The solution was cooled to room temperature and Et<sub>2</sub>O was added. The oily residue was decanted, and the upper layer was removed to collect the oil. Precipitation of was induced by adding to the oil MeOH and Et<sub>2</sub>O.

#### Compound 4

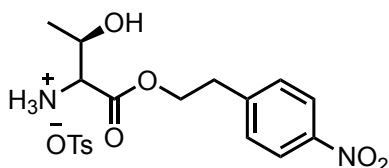

**Yield:** 70%; **IR:**  $\tilde{\nu}$  = 3401 (w), 2930 (s), 2892 (s), 2858 (s), 1730 (s), 1510 (vs), 1465 (s), 1300 (vs), 1258 (s), 1167 (s), 1010 (s), 895 (w), 832 (s)  $\text{cm}^{-1}$ ; **<sup>1</sup>H NMR (400 MHz, DMSO-*d*<sub>6</sub>)  $\delta$ :** 8.2 – 8.1 (m, 5H), 7.58 (d,  $J$  = 8.8 Hz, 2H), 7.48 (d,  $J$  = 8.2 Hz, 2H), 7.11 (d,  $J$  = 8.2 Hz, 2H), 5.6 (br. s., 1H), 4.45 (t,  $J$  = 6.2 Hz, 2H), 4.1 – 4.0 (m, 1H), 3.89 (d,  $J$  = 4.0 Hz, 1H), 3.10 (t,  $J$  = 6.2 Hz, 2H), 2.29 (s, 3H), 1.14 (d,  $J$  = 6.6 Hz, 3H); **<sup>13</sup>C NMR (101 MHz, DMSO-*d*<sub>6</sub>)  $\delta$ :** 168.2, 146.5, 146.3, 137.7, 130.4, 128.1, 125.6, 123.5, 65.4, 64.9, 57.9, 33.8, 20.7, 20.0; **HRMS (ESI):** calculated for C<sub>12</sub>H<sub>17</sub>N<sub>2</sub>O<sub>5</sub><sup>+</sup>:  $m/z$  = 269.1137 [M+H]<sup>+</sup>; found:  $m/z$  = 269.1140 [M+H]<sup>+</sup>.

The analytical data is in agreement with the literature.<sup>1</sup>

#### Compound 5

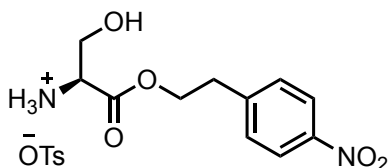

**Yield:** 75%; **IR:**  $\tilde{\nu}$  = 3400 (w), 2931 (s), 2894 (s), 2858 (s), 1730 (s), 1510 (vs), 1465 (s), 1300 (vs), 1258 (s), 1167 (s), 1010 (s), 895 (w), 832 (s)  $\text{cm}^{-1}$ ;  **$^1\text{H}$  NMR (400 MHz, DMSO- $d_6$ )  $\delta$ :** 8.34 (br. s, 3H), 8.16 (d,  $J$  = 8.9 Hz, 2H), 7.58 (d,  $J$  = 8.9 Hz, 2H), 7.50 (d,  $J$  = 8.0 Hz, 2H), 7.12 (d,  $J$  = 8.0 Hz, 2H), 4.49 – 4.36 (m, 2H), 4.11 (br. s, 1H), 3.74 – 3.73 (m, 2H), 3.08 (t,  $J$  = 6.4 Hz, 2H), 2.28 (s, 3H);  **$^{13}\text{C}$  NMR (101 MHz, DMSO- $d_6$ )  $\delta$ :** 168.0, 146.3, 138.0, 130.4, 128.2, 125.6, 123.5, 65.4, 59.5, 54.2, 33.9, 20.9; **HRMS (ESI):** calculated for  $\text{C}_{11}\text{H}_{15}\text{N}_2\text{O}_5^+$ :  $m/z$  = 255.0981  $[\text{M}+\text{H}]^+$ ; found:  $m/z$  = 255.0977  $[\text{M}+\text{H}]^+$ .

### Compound 6

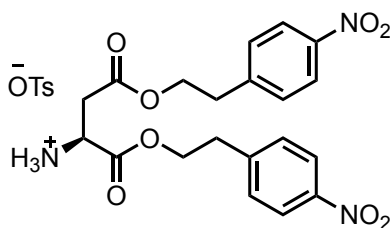

**Yield:** 82 %; **IR:**  $\tilde{\nu}$  = 3402 (w), 2933 (s), 2894 (s), 2858 (s), 1730 (s), 1689 (s), 1514 (vs), 1469 (s), 1310 (vs), 1258 (s), 1167 (s), 1010 (s), 895 (w), 834 (s)  $\text{cm}^{-1}$ ;  **$^1\text{H}$  NMR (400 MHz, DMSO- $d_6$ )  $\delta$ :** 8.42 (s, 3H), 8.16 – 8.11 (m, 4H), 7.55 – 7.48 (m, 6H), 7.12 (d,  $J$  = 7.9 Hz, 2H), 4.37 (t,  $J$  = 6.3 Hz, 2H), 4.34 – 4.30 (m, 1H), 4.26 (q,  $J$  = 6.3 Hz, 2H), 3.01 (q,  $J$  = 6.5 Hz, 4H), 2.85 (qd,  $J$  = 17.5, 5.1 Hz, 2H), 2.28 (s, 3H);  **$^{13}\text{C}$  NMR (101 MHz, DMSO- $d_6$ )  $\delta$ :** 169.0, 168.1, 146.4, 146.3, 145.3, 138.0, 130.3, 130.2, 128.2, 125.6, 123.5, 123.5, 65.7, 64.7, 48.4, 34.1, 33.8, 33.7, 20.8; **HRMS (ESI):** calculated for  $\text{C}_{20}\text{H}_{22}\text{N}_3\text{O}_8^+$ :  $m/z$  = 432.1401  $[\text{M}+\text{H}]^+$ ; found:  $m/z$  = 432.1405  $[\text{M}+\text{H}]^+$ .

### General procedure of hydroxy group protection with TBSCl

The reaction was performed according to the procedure published before.<sup>1</sup>

Npe-protected ester (1 eq.) was dissolved in pyridine and treated with one half of TBSCl (3 eq.) and 1*H*-imidazole (3 eq.). After 10 min, the second half was added, and the reaction mixture was left to stir at room temperature overnight. The mixture was diluted with  $\text{CH}_2\text{Cl}_2$  and washed successively with sat.  $\text{NaHCO}_3$  solution and  $\text{H}_2\text{O}$ . The organic layer was dried, evaporated and purified by flash chromatography eluting with  $\text{CH}_2\text{Cl}_2/\text{MeOH}$  (10/1, v/v) to afford the target compound as an oil.

### Compound 7

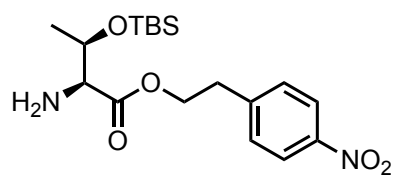

**Yield:** 94%; **IR:**  $\tilde{\nu}$  = 3854 (w), 3745 (w), 2930 (w), 2856 (w), 1735 (vs), 1601 (s), 1518 (vs), 1472 (w), 1463 (w), 1374 (w), 1344 (vs), 1251 (s), 1155 (s), 1076 (s), 967 (s), 835 (s), 775 (s), 747 (s)  $\text{cm}^{-1}$ ;  **$^1\text{H NMR}$  (400 MHz,  $\text{CDCl}_3$ )  $\delta$ :** 8.16 (d,  $J$  = 8.6 Hz, 2H), 7.38 (d,  $J$  = 8.6 Hz, 2H), 4.41 (dt,  $J$  = 11.0, 6.8 Hz, 1H), 4.29 – 4.16 (m, 2H), 3.24 (d,  $J$  = 2.8 Hz, 1H), 3.06 (t,  $J$  = 6.8 Hz, 2H), 1.20 (d,  $J$  = 6.3 Hz, 3H), 0.80 (s, 9H), -0.01 (s, 3H), -0.10 (s, 3H);  **$^{13}\text{C NMR}$  (101 MHz,  $\text{CDCl}_3$ )  $\delta$ :** 174.3, 147.0, 145.6, 129.9, 123.9, 69.6, 64.5, 60.9, 35.0, 25.7, 21.0, 17.9, -4.2, -5.2; **HRMS (ESI):** calculated for  $\text{C}_{18}\text{H}_{31}\text{N}_2\text{O}_5\text{Si}^+$ :  $m/z$  = 383.2002  $[\text{M}+\text{H}]^+$ ; found:  $m/z$  = 383.1997  $[\text{M}+\text{H}]^+$ .

The analytical data is in agreement with the literature.<sup>1</sup>

### Compound 8

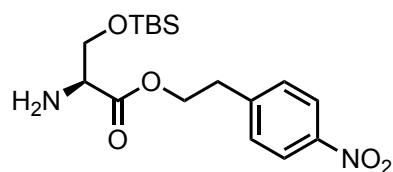

**Yield:** 96%; **IR:**  $\tilde{\nu}$  = 3854 (w), 3745 (w), 2955 (w), 2930 (w), 2856 (w), 1735 (vs), 1601 (s), 1518 (vs), 1472 (w), 1374 (w), 1344 (vs), 1251 (s), 1155 (s), 1075 (s), 967 (s), 855 (w), 835 (s), 775 (s), 747 (s)  $\text{cm}^{-1}$ ;  **$^1\text{H NMR}$  (400 MHz,  $\text{CDCl}_3$ )  $\delta$ :** 8.13 (d,  $J$  = 8.6 Hz, 2H), 7.36 (d,  $J$  = 8.6 Hz, 2H), 4.34 (q,  $J$  = 6.7 Hz, 2H), 3.82 (dd,  $J$  = 9.8, 3.7 Hz, 1H), 3.73 (dd,  $J$  = 9.8, 3.0 Hz, 1H), 3.47 (s, 1H), 3.04 (t,  $J$  = 6.7 Hz, 2H), 0.81 (s, 9H);  **$^{13}\text{C NMR}$  (101 MHz,  $\text{CDCl}_3$ )  $\delta$ :** 173.9, 146.9, 145.6, 129.8, 123.8, 65.4, 64.4, 56.5, 34.9, 25.7, 18.2, -5.5, -5.6; **HRMS (ESI):** calculated for  $\text{C}_{17}\text{H}_{29}\text{N}_2\text{O}_5\text{Si}^+$ :  $m/z$  = 369.1846  $[\text{M}+\text{H}]^+$ ; found:  $m/z$  = 369.1842  $[\text{M}+\text{H}]^+$ .

### General procedure for npe-ester formation of Boc-protected amino acid

Boc-amino acid (1 eq.) was dissolved in  $\text{CH}_2\text{Cl}_2$  under inert atmosphere and cooled to 0 °C. Then npeOH (1.3 eq.) and  $\text{PPh}_3$  (1.3 eq.) were added followed by slow addition of DIAD (1.3 eq.). The reaction mixture was left to stir for 2 h at room temperature. Then the solution was washed with water, organic phase was dried over  $\text{Na}_2\text{SO}_4$  and evaporated. The crude product was purified by flash chromatography to afford the target product.

## Compound 12

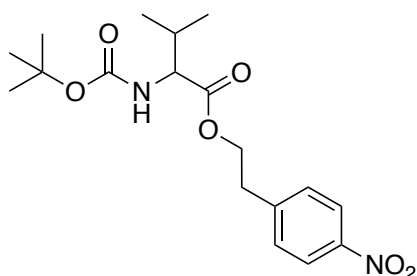

Eluent: Hex/EtOAc (4/1, v/v).

**Yield:** 96%; **IR:**  $\tilde{\nu}$  = 3397 (w), 2975 (w), 1751 (s), 1709 (vs), 1519 (vs), 1391 (w), 1366 (w), 1345 (vs), 1159 (vs), 1056 (w), 905 (vs), 723 (vs)  $\text{cm}^{-1}$ ;  **$^1\text{H NMR}$  (400 MHz,  $\text{CDCl}_3$ )  $\delta$ :** 8.15 (d,  $J$  = 8.6 Hz, 2H), 7.38 (d,  $J$  = 8.6 Hz, 2H), 4.95 (d,  $J$  = 8.7 Hz, 1H), 4.38 (t,  $J$  = 6.6 Hz, 2H), 4.15 (dd,  $J$  = 9.0, 4.8 Hz, 1H), 3.06 (t,  $J$  = 6.6 Hz, 2H), 2.05 – 1.97 (m, 1H), 1.41 (s, 9H), 0.88 (d,  $J$  = 6.8 Hz, 3H), 0.78 (d,  $J$  = 6.8 Hz, 3H);  **$^{13}\text{C NMR}$  (101 MHz,  $\text{CDCl}_3$ )  $\delta$ :** 172.4, 155.7, 146.9, 145.5, 129.8, 123.8, 79.9, 64.5, 58.6, 34.9, 31.2, 28.4, 19.0, 17.6; **HRMS (ESI):** calculated for  $\text{C}_{18}\text{H}_{27}\text{N}_2\text{O}_6^+$ :  $m/z$  = 367.1869  $[\text{M}+\text{H}]^+$ ; found:  $m/z$  = 367.1874  $[\text{M}+\text{H}]^+$ .

## Compound 13

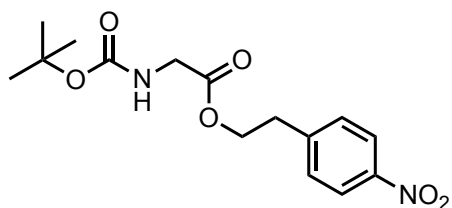

Eluent: Hex/EtOAc (3/1, v/v).

**Yield:** 85%; **IR:**  $\tilde{\nu}$  = 3396 (w), 2978 (w), 2254 (w), 1750 (s), 1707 (vs), 1601 (w), 1518 (vs), 1391 (w), 1366 (w), 1345 (vs), 1250 (w), 1159 (vs), 1056 (w), 905 (vs), 727 (vs)  $\text{cm}^{-1}$ ;  **$^1\text{H NMR}$  (400 MHz,  $\text{CDCl}_3$ )  $\delta$ :** 8.10 (d,  $J$  = 8.6 Hz, 2H), 7.38 (d,  $J$  = 8.6 Hz, 2H), 4.97 (d,  $J$  = 9.2 Hz, 1H), 4.39 (t,  $J$  = 6.6 Hz, 2H), 3.87 (d,  $J$  = 5.8 Hz, 2H), 3.06 (t,  $J$  = 6.6 Hz, 2H), 1.43 (s, 9H);  **$^{13}\text{C NMR}$  (101 MHz,  $\text{CDCl}_3$ )  $\delta$ :** 170.3, 155.8, 147.0, 145.4, 129.9, 123.9, 80.3, 64.7, 42.4, 34.9, 28.4; **HRMS (ESI):** calculated for  $\text{C}_{15}\text{H}_{21}\text{N}_2\text{O}_6^+$ :  $m/z$  = 325.1400  $[\text{M}+\text{H}]^+$ ; found:  $m/z$  = 325.1398  $[\text{M}+\text{H}]^+$ .

The analytical data is in agreement with the literature.<sup>2</sup>

### Compound 14a

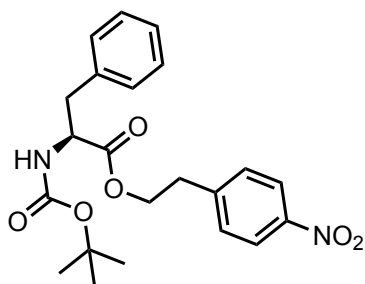

Eluent: Hex/EtOAc (4/1, v/v).

**Yield:** 81%; **IR:**  $\tilde{\nu}$  = 3426 (w), 3356 (w), 1740 (w), 1709 (vs), 1602 (w), 1518 (vs), 1495 (s), 1344 (vs), 1249 (w), 1159 (vs), 1056 (w), 855 (s), 733 (s), 698 (vs)  $\text{cm}^{-1}$ ;  **$^1\text{H NMR}$  (400 MHz,  $\text{CDCl}_3$ )  $\delta$ :** 8.15 (d,  $J$  = 8.7 Hz, 2H), 7.31 (d,  $J$  = 8.7 Hz, 2H), 7.25 – 7.20 (m, 3H), 7.04 (d,  $J$  = 5.6 Hz, 2H), 4.90 (d,  $J$  = 8.4 Hz, 1H), 4.54 (q,  $J$  = 6.4 Hz, 1H), 4.39 – 4.25 (m, 2H), 3.07 – 2.93 (m, 4H), 1.41 (s, 9H);  **$^{13}\text{C NMR}$  (101 MHz,  $\text{CD}_2\text{Cl}_2$ )  $\delta$ :** 171.8, 155.0, 146.9, 145.3, 135.8, 129.8, 129.2, 128.6, 127.1, 123.8, 80.1, 64.7, 54.5, 38.4, 34.7, 28.3; **HRMS (ESI):** calculated for  $\text{C}_{22}\text{H}_{26}\text{N}_2\text{O}_6\text{Na}^+$ :  $m/z$  = 437.1683  $[\text{M}+\text{Na}]^+$ ; found:  $m/z$  = 437.1684  $[\text{M}+\text{Na}]^+$ .

### Compound 14b

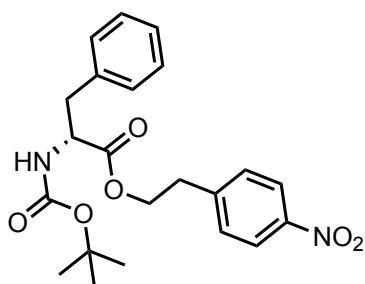

Eluent: Hex/EtOAc (4/1, v/v).

**Yield:** 85%; **IR:**  $\tilde{\nu}$  = 3443 (w), 3375 (w), 2977 (w), 2929 (w), 1740 (w), 1709 (vs), 1602 (w), 1517 (vs), 1495 (s), 1343 (vs), 1248 (w), 1157 (vs), 1055 (w), 855 (s), 747 (s), 698 (vs)  $\text{cm}^{-1}$ ;  **$^1\text{H NMR}$  (400 MHz,  $\text{CDCl}_3$ )  $\delta$ :** 8.16 (d,  $J$  = 8.7 Hz, 2H), 7.33 (d,  $J$  = 8.7 Hz, 2H), 7.30 – 7.20 (m, 3H), 7.07 (d,  $J$  = 6.2 Hz, 2H), 4.97 (d,  $J$  = 8.4 Hz, 1H), 4.56 (q,  $J$  = 6.2 Hz, 1H), 4.40 – 4.27 (m, 2H), 3.08 – 2.93 (m, 4H), 1.43 (s, 9H);  **$^{13}\text{C NMR}$  (101 MHz,  $\text{CDCl}_3$ )  $\delta$ :** 171.8, 155.1, 146.9, 145.4, 135.9, 129.8, 129.2, 128.6, 127.1, 123.8, 80.0, 64.7, 54.5, 38.4, 34.7, 28.3; **HRMS (ESI):** calculated for  $\text{C}_{22}\text{H}_{30}\text{N}_3\text{O}_6^+$ :  $m/z$  = 432.2129  $[\text{M}+\text{NH}_4]^+$ ; found:  $m/z$  = 432.2131  $[\text{M}+\text{NH}_4]^+$ .



## Compound 19

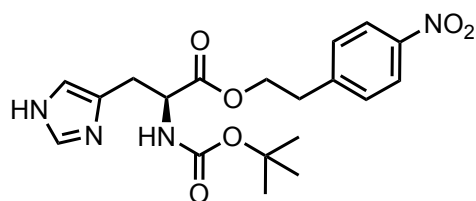

Boc-histidine (0.5 g, 1.96 mmol, 1 eq.), 2-(4-nitrophenyl)ethanol (0.655 g, 3.92 mmol, 2 eq.), DMAP (0.048 g, 0.39 mmol, 0.20 eq.) and HBTU (0.967 g, 2.55 mmol, 1.3 eq.) were dissolved in DMF (4 ml) under inert atmosphere. Diisopropylamine (686  $\mu$ l, 4.90 mmol, 2.5 eq.) was added dropwise and the reaction mixture was stirred overnight at room temperature. The resulting solution was diluted with EtOAc (30 ml) and quenched with saturated  $\text{NH}_4\text{Cl}$  solution (15 ml). The organic layer was washed with water, dried and the solvents were removed *in vacuo*. The crude product was purified by flash chromatography on silica gel (2% to 5% MeOH in DCM) to obtain the target product as a pale-yellow foam.

**Yield:** 93%; **IR:**  $\tilde{\nu}$  = 2977 (w), 1699 (vs), 1600 (s), 1516 (vs), 1391 (w), 1365 (w), 1344 (vs), 1250 (w), 1160 (vs), 1108 (w), 1054 (w), 1016 (w), 855 (vs), 748 (w), 697 (w)  $\text{cm}^{-1}$ ;  **$^1\text{H NMR}$  (400 MHz,  $\text{CDCl}_3$ )**  $\delta$ : 8.18 – 8.07 (m, 2H), 7.58 (s, 1H), 7.41 – 7.30 (m, 2H), 6.72 (s, 1H), 5.77 (d,  $J$  = 8.2 Hz, 1H), 4.51 (q,  $J$  = 6.2 Hz, 1H), 4.34 (t,  $J$  = 6.6 Hz, 2H), 3.06 – 3.00 (m, 4H), 1.41 (s, 9H);  **$^{13}\text{C NMR}$  (101 MHz,  $\text{CDCl}_3$ )**  $\delta$ : 172.1, 155.7, 147.1, 145.7, 135.2, 134.2, 130.0, 123.9, 115.9, 80.2, 64.9, 53.6, 34.9, 29.7, 28.5; **HRMS (ESI):** calculated for  $\text{C}_{19}\text{H}_{25}\text{N}_4\text{O}_6^+$ :  $m/z$  = 405.1769  $[\text{M}+\text{H}]^+$ ; found:  $m/z$  = 405.1765  $[\text{M}+\text{H}]^+$ .

## General procedure for deprotection of Boc-protecting group

Npe-protected amino acid was dissolved in 4M HCl/Dioxane mixture at 0  $^\circ\text{C}$ . The reaction mixture was left to stir for 2 h and afterwards was evaporated to dryness. The resulting product was used for further steps without additional purification.

## Compound 15

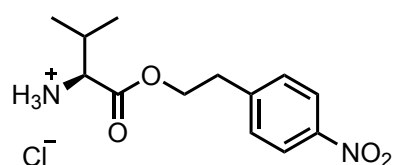

**Yield:** 99%; **IR:**  $\tilde{\nu}$  = 3335 (w), 2964 (w), 2850 (w), 1741 (s), 1604 (w), 1516 (vs), 1464 (w), 1379 (vs), 1232 (vs), 1215 (s), 1170 (w), 1043 (w), 969 (w), 857 (s), 751 (s), 700 (s)  $\text{cm}^{-1}$ ;  **$^1\text{H NMR}$**

**NMR (400 MHz, DMSO-*d*<sub>6</sub>)**  $\delta$ : 8.66 (br. s, 3H), 8.17 (d,  $J = 8.6$  Hz, 2H), 7.62 (d,  $J = 8.6$  Hz, 2H), 4.46 (dtd,  $J = 23.3, 11.1, 6.3$  Hz, 2H), 3.76 (d,  $J = 4.5$  Hz, 1H), 3.11 (t,  $J = 6.3$  Hz, 2H), 2.10 (tt,  $J = 11.6, 5.8$  Hz, 1H), 0.84 (d,  $J = 3.0$  Hz, 3H), 0.82 (d,  $J = 3.0$  Hz, 3H). **<sup>13</sup>C NMR (101 MHz, DMSO-*d*<sub>6</sub>)**  $\delta$ : 168.8, 146.3, 130.4, 123.4, 65.3, 57.2, 33.8, 29.2, 18.3, 17.4 **HRMS (ESI)**: calculated for C<sub>13</sub>H<sub>19</sub>N<sub>2</sub>O<sub>4</sub><sup>+</sup>:  $m/z = 267.1339$  [M+H]<sup>+</sup>; found:  $m/z = 267.1139$  [M+H]<sup>+</sup>.

### Compound 16

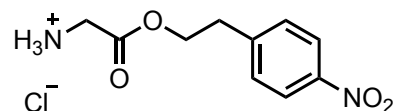

**Yield:** 99%; **IR:**  $\tilde{\nu} = 2949$  (w), 1746 (s), 1515 (vs), 1310 (vs), 1238 (vs), 1053 (w), 955 (s), 905 (s) 856 (s), 698 (s) cm<sup>-1</sup>; **<sup>1</sup>H NMR (400 MHz, DMSO-*d*<sub>6</sub>)**  $\delta$ : 8.30 (br. s, 3H), 8.18 (d,  $J = 8.7$  Hz, 2H), 7.59 (d,  $J = 8.7$  Hz, 2H), 4.44 (t,  $J = 6.4$  Hz, 2H), 3.77 (s, 2H), 3.09 (t,  $J = 6.4$  Hz, 2H); **<sup>13</sup>C NMR (101 MHz, DMSO-*d*<sub>6</sub>)**  $\delta$ : 167.6, 156.2, 146.3, 130.4, 123.5, 67.9, 33.9, 28.2, 22.0; **HRMS (ESI)**: calculated for C<sub>10</sub>H<sub>13</sub>N<sub>2</sub>O<sub>4</sub><sup>+</sup>:  $m/z = 225.0870$  [M+H]<sup>+</sup>; found:  $m/z = 225.0868$  [M+H]<sup>+</sup>.

The analytical data is in agreement with the literature.<sup>2</sup>

### Compound 17a

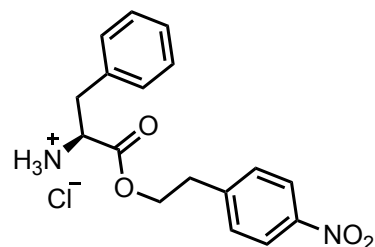

**Yield:** 99%; **IR:**  $\tilde{\nu} = 3142$  (w), 2988 (w), 2802 (w), 1740 (vs), 1601 (s), 1518 (vs), 1490 (vs), 1351 (vs), 1232 (vs), 1191 (s), 1102 (s), 981 (s), 856 (vs), 755 (vs), 736 (vs), 706 (vs) cm<sup>-1</sup>; **<sup>1</sup>H NMR (400 MHz, DMSO-*d*<sub>6</sub>)**  $\delta$ : 8.74 (br. s, 3H), 8.16 (d,  $J = 8.7$  Hz, 2H), 7.49 (d,  $J = 8.7$  Hz, 2H), 7.33 – 7.21 (m, 3H), 7.12 (dd,  $J = 7.8, 1.8$  Hz, 2H), 4.33 (t,  $J = 6.3$  Hz, 2H), 4.20 (dd,  $J = 7.8, 5.5$  Hz, 1H), 3.16 (dd,  $J = 14.0, 5.5$  Hz, 1H), 3.06 – 2.89 (m, 3H); **<sup>13</sup>C NMR (101 MHz, DMSO-*d*<sub>6</sub>)**  $\delta$ : 168.9, 146.3, 134.9, 130.4, 129.4, 128.5, 127.2, 123.4, 65.4, 53.3, 35.8, 33.7; **HRMS (ESI)**: calculated for C<sub>17</sub>H<sub>19</sub>N<sub>2</sub>O<sub>4</sub><sup>+</sup>:  $m/z = 315.1339$  [M+H]<sup>+</sup>; found:  $m/z = 315.1332$  [M+H]<sup>+</sup>.

### Compound 17b

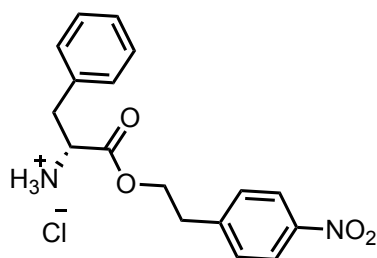

**Yield:** 99%; **IR:**  $\tilde{\nu}$  = 3146 (w), 2988 (w), 2802 (w), 1740 (vs), 1602 (s), 1518 (vs), 1490 (vs), 1351 (vs), 1232 (vs), 1192 (s), 1102 (s), 856 (vs), 755 (vs), 736 (vs), 705 (vs)  $\text{cm}^{-1}$ ;  **$^1\text{H}$  NMR (400 MHz, DMSO- $d_6$ )**  $\delta$ : 8.91 (br. s., 3H), 8.12 (d,  $J$  = 8.7 Hz, 2H), 7.46 (d,  $J$  = 8.7 Hz, 2H), 7.27 – 7.20 (m, 3H), 7.12 (d,  $J$  = 6.4 Hz, 2H), 4.29 (t,  $J$  = 6.4 Hz, 2H), 4.19 – 4.08 (m, 1H), 3.21 (dd,  $J$  = 14.1, 5.0, 1H), 3.10 – 2.88 (m, 3H);  **$^{13}\text{C}$  NMR (101 MHz, DMSO- $d_6$ )**  $\delta$ : 168.9, 146.3, 134.8, 130.4, 129.4, 128.5, 127.2, 123.4, 65.4, 53.3, 35.8, 33.7; **HRMS (ESI):** calculated for  $\text{C}_{17}\text{H}_{19}\text{N}_2\text{O}_4^+$ :  $m/z$  = 315.1339  $[\text{M}+\text{H}]^+$ ; found:  $m/z$  = 315.1332  $[\text{M}+\text{H}]^+$ .

### Compound 21

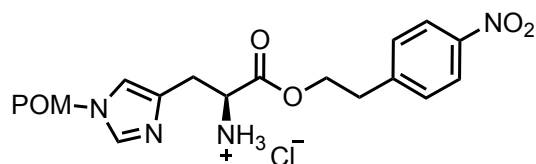

**Yield:** 98%; **IR:**  $\tilde{\nu}$  = 2960 (w), 1737 (vs), 1624 (w), 1598 (w), 1516 (vs), 1454 (w), 1415 (w), 1351 (vs), 1282 (w), 1188 (w), 1124 (vs), 1045 (w), 1008 (w), 854 (s), 774 (w), 749 (w), 701 (w)  $\text{cm}^{-1}$ ;  **$^1\text{H}$  NMR (400 MHz, DMSO- $d_6$ )**  $\delta$ : 8.69 (s, 3H), 8.21 – 8.15 (m, 2H), 7.59 – 7.55 (m, 2H), 7.51 (s, 1H), 6.04 (s, 2H), 4.39 (m, 3H), 3.56 (s, 1H), 3.17 (d,  $J$  = 6.9 Hz, 2H), 3.04 (td,  $J$  = 6.4, 3.9 Hz, 2H), 1.13 (s, 9H);  **$^{13}\text{C}$  NMR (101 MHz, DMSO- $d_6$ )**  $\delta$ : 176.7, 168.2, 146.4, 146.1, 137.4, 130.4, 123.5, 120.0, 69.2, 66.4, 65.6, 51.1, 38.2, 33.7, 26.5; **HRMS (ESI):** calculated for  $\text{C}_{20}\text{H}_{27}\text{N}_4\text{O}_6^+$ :  $m/z$  = 419.1925  $[\text{M}+\text{H}]^+$ ; found: 419.1919  $[\text{M}+\text{H}]^+$ .

### Compound 20

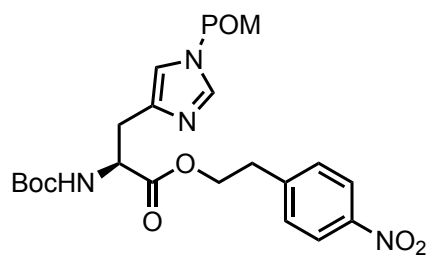

The histidine derivative **19** (0.745 g, 1.84 mmol, 1 eq.) was dissolved in DMF (12 mL) under N<sub>2</sub> atmosphere at 0 °C. Subsequently, K<sub>2</sub>CO<sub>3</sub> (0.509 g, 3.68 mmol, 2 eq.) was added and the mixture was stirred for 40 min. Chloromethylpivalate (319 µl, 2.21 mmol, 1.2 eq.) was added dropwise at 0°C and the reaction mixture was left to warm to room temperature while stirring for 5 h. Catalytic amounts of KI were added and the mixture was stirred for another 1 h. The resulting suspension was diluted with EtOAc (75 ml) and quenched with saturated NH<sub>4</sub>Cl solution (35 ml). The organic phase was washed with water, dried over Na<sub>2</sub>SO<sub>4</sub> and concentrated *in vacuo*. The crude mixture was purified by flash chromatography on silica gel (40% isoohexane in EtOAc to pure EtOAc). The pivalate protected histidine derivative was obtained as a yellow oil.

**Yield:** 55%; **IR:** 2850 (w), 2600 (w), 1738 (vs), 1624 (w), 1598 (w), 1573 (w), 1516 (vs), 1454 (w), 1414 (w), 1350 (vs), 1282 (w), 1191 (w), 1124 (vs), 1044 (w), 1008 (w), 854 (vs), 773 (w), 749 (w), 701 (w) cm<sup>-1</sup>; **<sup>1</sup>H NMR (400 MHz, CDCl<sub>3</sub>)** δ: 8.19 – 8.14 (m, 2H), 7.54 (d, *J* = 1.4 Hz, 1H), 7.42 – 7.36 (m, 2H), 6.71 (s, 1H), 5.81 (d, *J* = 8.2 Hz, 1H), 5.73 (s, 2H), 4.51 (dt, *J* = 8.2, 5.3 Hz, 1H), 4.34 (t, *J* = 6.7 Hz, 2H), 3.04 (t, *J* = 6.7 Hz, 2H), 2.97 (t, *J* = 5.2 Hz, 2H), 1.42 (s, 9H), 1.14 (s, 9H); **<sup>13</sup>C NMR (101 MHz, CDCl<sub>3</sub>)** δ: 177.9, 172.0, 155.7, 147.0, 145.8, 138.3, 130.0, 123.9, 117.3, 79.9, 77.4, 67.7, 64.7, 53.5, 38.9, 35.0, 30.1, 28.5, 27.0; **HRMS (ESI):** calculated for C<sub>25</sub>H<sub>35</sub>N<sub>4</sub>O<sub>8</sub><sup>+</sup>: *m/z* = 519.2449 [M+H]<sup>+</sup>; found: *m/z* = 519.2441 [M+H]<sup>+</sup>.

## Compound 22

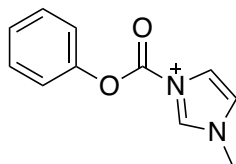

The reaction was conducted according to a published procedure.<sup>3</sup>

Phenyl chloroformate (4 ml, 31.9 mmol, 1 eq.) was dissolved in dry CH<sub>2</sub>Cl<sub>2</sub> under nitrogen and cooled to 0 °C. Then *N*-methylimidazole (2.54 ml, 31.9 mmol, 1 eq.) was added dropwise. The mixture was allowed to stir at room temperature for 2 hours. Afterwards the reaction mixture was filtered, the precipitate was washed with CH<sub>2</sub>Cl<sub>2</sub> and dried.

**Yield:** 95%; **IR:**  $\tilde{\nu}$  = 2926 (w), 1783 (vs), 1588 (w), 1536 (w), 1372 (s), 1330 (s), 1232 (vs), 749 (vs), 689 (s) cm<sup>-1</sup>; **<sup>1</sup>H NMR (400 MHz, DMSO-*d*<sub>6</sub>)** δ: 10.29 (s, 1H), 8.37 (s, 1H), 8.02 (s, 1H), 7.43 – 7.58 (m, 5H), 4.01 (s, 3H); **<sup>13</sup>C NMR (101 MHz, DMSO-*d*<sub>6</sub>)** δ: 157.5, 135.6, 129.3, 123.1, 121.3, 119.5, 118.6, 115.3, 35.4.

The analytical data is in agreement with the literature.<sup>3</sup>

## Compound 24

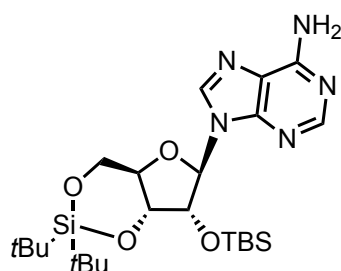

Compound was synthesized following the procedure published earlier.<sup>4</sup>

Adenosine **23** (1 g, 3.74 mmol, 1 eq.) was suspended in DMF and di-*tert*-butylsilyl ditriflate (1.46 ml, 4.49 mmol, 1.2 eq.) was added dropwise under stirring at 0 °C. The resulting solution was stirred at 0°C for 45 min. Then imidazole (1.27 g, 18.7 mmol, 5 eq.) was added and the reaction was warmed to room temperature over a period of 30 min. Then TBSCl (0.68 g, 4.49 mmol, 1.2 eq.) was added and the reaction was heated to 60 °C overnight. Subsequently, the reaction mixture was diluted with EtOAc and washed with water and brine. The organic layer was dried and evaporated. The residue was purified by flash chromatography (Hex/EtOAc, 1/1, v/v).

**Yield:** 76%; **IR:**  $\tilde{\nu}$  = 3148 (w), 2933 (w), 2859 (w), 2361 (w), 1677 (s), 1604 (s), 1598 (w), 1576 (w), 1473 (w), 1426 (w), 1363 (w), 1329 (w), 1302 (w), 1258 (w), 1200 (w), 1166 (w), 1136 (w), 1105 (w), 1064 (vs), 1009 (s), 890 (w), 828 (vs), 786 (w), 754 (w), 729 (w)  $\text{cm}^{-1}$ ; **<sup>1</sup>H NMR (400 MHz, CDCl<sub>3</sub>)**  $\delta$ : 8.31 (s, 1H), 7.83 (s, 1H), 6.12 (br. s, 2H), 5.91 (s, 1H), 4.61 (d,  $J$  = 4.7 Hz, 1H), 4.50 (ddd,  $J$  = 16.5, 9.3, 4.7 Hz, 2H), 4.25 – 4.17 (m, 1H), 4.03 (dd,  $J$  = 10.5, 9.3 Hz, 1H), 1.07 (s, 9H), 1.04 (s, 9H), 0.92 (s, 9H), 0.16 (s, 3H), 0.14 (s, 3H); **<sup>13</sup>C NMR (101 MHz, CDCl<sub>3</sub>)**  $\delta$ : 155.5, 152.8, 149.3, 138.9, 120.4, 92.6, 75.9, 75.6, 74.8, 67.9, 27.6, 27.1, 26.0, 22.9, 20.5, 18.4, -4.2, -4.8; **HRMS (ESI):** calculated for C<sub>24</sub>H<sub>44</sub>N<sub>5</sub>O<sub>4</sub>Si<sub>2</sub><sup>+</sup>:  $m/z$  = 522.2932 [M+H]<sup>+</sup>; found:  $m/z$  = 522.2926 [M+H]<sup>+</sup>.

The analytical data is in agreement with the literature.<sup>4</sup>

## General procedure for amino acid attachment to the adenosine derivative

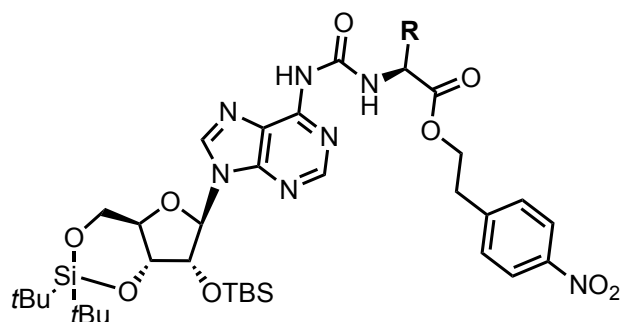

The silyl-protected adenosine derivative **24** (1 eq.) was dissolved in dry CH<sub>2</sub>Cl<sub>2</sub> under nitrogen atmosphere. 1-*N*-methyl-3-phenoxy-carbonyl-imidazolium chloride (**22**, 2 eq.) was added to the reaction mixture and the resulting suspension was stirred at room temperature for 2 hours (the solution in time becomes clear). Afterwards the protected amino acid (2 eq.) was added together with TEA (2 eq.) as a solution in CH<sub>2</sub>Cl<sub>2</sub> and the resulting solution was stirred overnight at room temperature. The reaction was quenched by addition of saturated aqueous NaHCO<sub>3</sub> solution. The solution was extracted three times with CH<sub>2</sub>Cl<sub>2</sub>, and the organic phase was dried, filtered and concentrated *in vacuo*. The residue was purified by flash chromatography eluting with Hex/EtOAc to give product as white foam.

### Compound 25

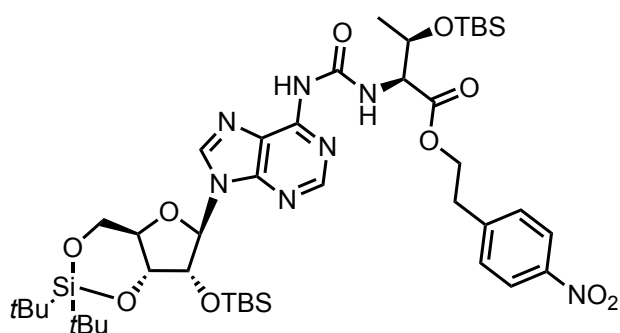

Eluent: Hex/EtOAc (4/3, v/v).

**Yield:** 91%; **IR:**  $\tilde{\nu}$  = 3237 (w), 2931 (s), 2857 (s), 1737 (s), 1701 (vs), 1610 (s), 1520 (vs), 1465 (s), 1345 (s), 1250 (s), 1136 (w), 1057 (s), 998 (w), 894 (w), 840 (s), 777 (s) cm<sup>-1</sup>; **<sup>1</sup>H NMR (400 MHz, CDCl<sub>3</sub>)**  $\delta$ : 10.05 (d, *J* = 9.0 Hz, 1H), 8.56 (s, 1H), 8.41 (s, 1H), 8.16 (s, 1H), 7.94 (d, *J* = 8.6 Hz, 2H), 7.32 (d, *J* = 8.6 Hz, 2H), 5.99 (s, 1H), 4.64 (d, *J* = 4.6 Hz, 1H), 4.60-4.46 (m, 3H), 4.33-4.24 (m, 2H), 4.20-4.29 (m, 1H), 4.05 (dd, *J* = 10.5, 9.1 Hz, 1H), 3.03 (t, *J* = 6.5 Hz, 2H), 1.25 (d, *J* = 6.5 Hz, 3H), 1.08 (s, 9H), 1.05 (s, 9H), 0.95 (s, 9H), 0.90 (s, 9H), 0.19 (s, 3H), 0.16 (s, 3H), 0.07 (s, 3H), -0.04 (s, 3H); **<sup>13</sup>C NMR (101 MHz, CDCl<sub>3</sub>)**  $\delta$ : 171.1, 154.6, 151.3, 150.3, 149.8, 146.8, 145.7, 141.6, 129.9, 123.7, 121.1, 92.6, 76.0, 75.7, 75.0, 68.8, 68.0, 64.8, 59.8, 35.0, 27.7, 27.2, 26.1, 25.7, 22.9, 21.3, 20.6, 18.5, 18.0, -4.1, -4.8, -5.2; **HRMS (ESI):** calculated for C<sub>43</sub>H<sub>72</sub>N<sub>7</sub>O<sub>10</sub>Si<sub>3</sub><sup>+</sup>: *m/z* = 930.4643 [M+H]<sup>+</sup>; found: *m/z* = 930.4640 [M+H]<sup>+</sup>.

## Compound 26

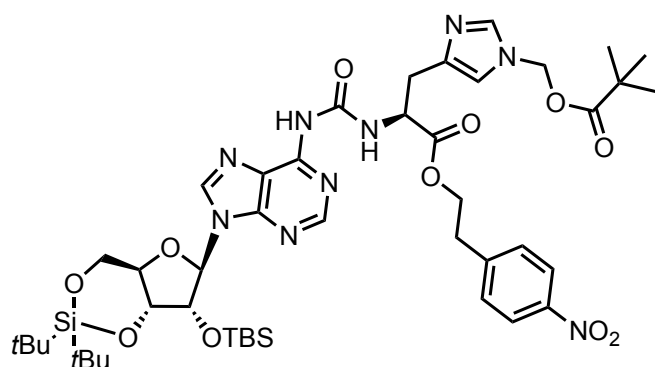

Eluent: 10% CH<sub>2</sub>Cl<sub>2</sub> in EtOAc to pure EtOAc.

**Yield:** 86%; **IR:**  $\tilde{\nu}$  = 3854 (w), 3745 (w), 3650 (w), 2932 (w), 2858 (w), 2361 (w), 2341 (w), 1735 (s), 1670 (s), 1654 (w), 1610 (w), 1587 (w), 1521 (vs), 1472 (s), 1395 (w), 1345 (vs), 1252 (w), 1166 (w), 1118 (vs), 1055 (vs), 999 (w), 894 (w), 826 (vs), 781 (s), 750 (w) cm<sup>-1</sup>; **<sup>1</sup>H NMR (400 MHz, CDCl<sub>3</sub>)**  $\delta$ : 10.05 (dd, *J* = 7.6, 3.7 Hz, 1H), 8.45 (s, 1H), 8.08 (s, 1H), 8.06 – 8.02 (m, 3H), 7.59 (d, *J* = 1.3 Hz, 1H), 7.41 – 7.35 (m, 2H), 6.86 (dd, *J* = 5.3, 1.3 Hz, 1H), 5.96 (d, *J* = 7.0 Hz, 1H), 5.74 (d, *J* = 2.6 Hz, 2H), 4.94 – 4.85 (m, 1H), 4.60 (dd, *J* = 6.0, 4.6 Hz, 1H), 4.53 – 4.46 (m, 2H), 4.42 (tq, *J* = 6.5, 1.7 Hz, 2H), 4.24 (tdd, *J* = 9.8, 5.0, 2.8 Hz, 1H), 4.08 – 4.00 (m, 1H), 3.23 – 3.12 (m, 2H), 3.07 (t, *J* = 6.5 Hz, 2H), 1.09 (s, 9H), 1.08 (s, 9H), 1.05 (s, 9H), 0.94 (s, 9H), 0.17 (s, 3H), 0.15 (s, 3H); **<sup>13</sup>C NMR (101 MHz, CDCl<sub>3</sub>)**  $\delta$ : 177.8, 171.7, 153.6, 151.3, 150.2, 149.8, 146.9, 145.8, 141.2, 138.4, 138.1, 123.0, 123.8, 121.1, 117.3, 92.6, 76.0, 75.7, 74.9, 67.9, 67.7, 64.7, 55.5, 38.8, 35.0, 30.7, 27.7, 27.2, 26.9, 26.1, 22.9, 20.5, 18.5, 1.3, -4.2; **HRMS (ESI):** calculated for C<sub>45</sub>H<sub>68</sub>N<sub>9</sub>O<sub>11</sub>Si<sub>2</sub><sup>+</sup>: *m/z* = 966.4571 [M+H]<sup>+</sup>; found: *m/z* = 966.4576 [M+H]<sup>+</sup>.

## Compound 27

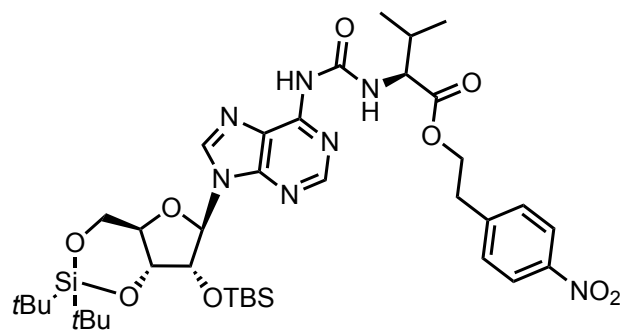

Eluent: Hex/EtOAc (4/3, v/v).

**Yield:** 78%; **IR:**  $\tilde{\nu}$  = 3230 (w), 2960 (w), 2960 (w), 2858 (w), 1741 (s), 1702 (vs), 1611 (s), 1520 (vs), 1466 (s), 1345 (vs), 1250 (s), 1139 (vs), 1057 (vs), 999 (s), 894 (s), 810 (vs), 781 (s)  $\text{cm}^{-1}$ ;  **$^1\text{H}$  NMR (400 MHz,  $\text{CDCl}_3$ )  $\delta$ :** 10.01 (d,  $J$  = 8.4 Hz, 1H), 8.50 (s, 1H), 8.17 (s, 1H), 8.07 (d,  $J$  = 8.3 Hz, 2H), 7.28 (d,  $J$  = 8.3 Hz, 2H), 5.98 (s, 1H), 4.61 (d,  $J$  = 4.6 Hz, 1H), 4.56 – 4.38 (m, 5H), 4.20-4.29 (m, 1H), 4.07 (dd,  $J$  = 10.5, 9.1 Hz, 1H), 3.09 (t,  $J$  = 6.5 Hz, 2H), 2.28 – 2.21 (m, 1H), 1.08 (s, 9H), 1.05 (s, 9H), 1.00 (d,  $J$  = 6.5 Hz, 3H), 0.95 (s, 12H), 0.18 (s, 3H), 0.16 (s, 3H);  **$^{13}\text{C}$  NMR (101 MHz,  $\text{CDCl}_3$ )  $\delta$ :** 171.1, 154.1, 152.2, 151.1, 149.8, 146.9, 145.6, 141.5, 129.9, 126.4, 123.7, 121.1, 92.6, 75.9, 75.7, 74.9, 67.9, 64.8, 58.8, 35.0, 30.9, 27.7, 27.2, 26.1, 22.9, 20.4, 19.5, 18.4, 18.0, -4.2, -4.9; **HRMS (ESI):** calculated for  $\text{C}_{38}\text{H}_{60}\text{N}_7\text{O}_9\text{Si}_2^+$ :  $m/z$  = 814.3991  $[\text{M}+\text{H}]^+$ ; found:  $m/z$  = 814.3976.

### Compound 28

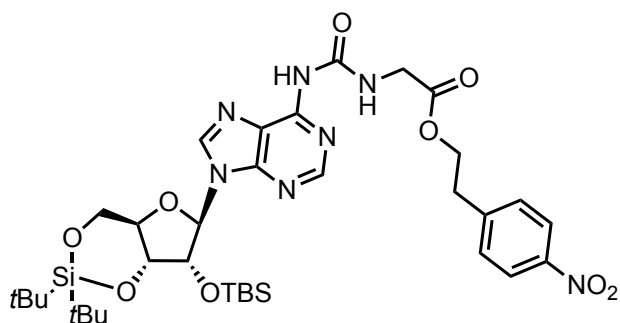

Eluent: Hex/EtOAc (4/3, v/v).

**Yield:** 72%; **IR:**  $\tilde{\nu}$  = 3239 (w), 2932 (s), 2858 (s), 1749 (s), 1703 (vs), 1611 (s), 1520 (vs), 1468 (s), 1345 (s), 1252 (s), 1141 (w), 1055 (s), 990 (w), 894 (w), 826 (s), 750 (s)  $\text{cm}^{-1}$ ;  **$^1\text{H}$  NMR (400 MHz,  $\text{CDCl}_3$ )  $\delta$ :** 9.95 (br. s, 1H), 8.50 (s, 1H), 8.21 – 8.03 (m, 3H), 7.38 (d,  $J$  = 8.6 Hz, 2H), 5.98 (s, 1H), 4.60 (d,  $J$  = 4.7 Hz, 1H), 4.57 – 4.40 (m, 4H), 4.30 – 4.17 (m, 3H), 4.10 – 4.03 (m, 1H), 3.09 (t,  $J$  = 6.6 Hz, 2H), 1.08 (s, 9H), 1.05 (s, 9H), 0.94 (s, 9H), 0.17 (s, 3H), 0.16 (s, 3H);  **$^{13}\text{C}$  NMR (101 MHz,  $\text{CDCl}_3$ )  $\delta$ :** 170.0, 154.2, 151.2, 150.2, 149.9, 147.0, 145.5, 141.4, 129.9, 123.8, 121.1, 92.5, 76.0, 75.7, 74.9, 67.9, 42.2, 35.0, 27.6, 27.2, 26.0, 22.9, 20.5, 18.5, -4.1, -4.9; **HRMS (ESI):** calculated for  $\text{C}_{35}\text{H}_{54}\text{N}_7\text{O}_9\text{Si}_2^+$ :  $m/z$  = 772.3522  $[\text{M}+\text{H}]^+$ ; found:  $m/z$  = 772.3504  $[\text{M}+\text{H}]^+$ .



## Compound 29

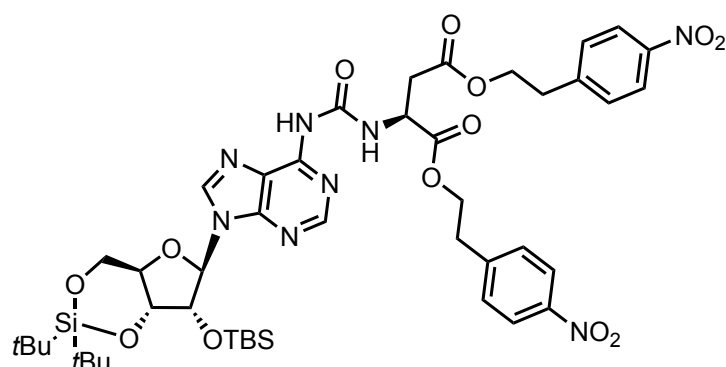

Eluent: Hex/EtOAc (2/1, v/v).

**Yield:** 87%; **IR:**  $\tilde{\nu}$  = 3229 (w), 2953 (w), 2929 (w), 2857 (w), 1735 (s), 1693 (s), 1607 (s), 1589 (s), 1517 (vs), 1469 (s), 1391 (w), 1310 (vs), 1292 (w), 1251 (w), 1210 (w), 835 (s)  $\text{cm}^{-1}$ ;  **$^1\text{H}$  NMR (400 MHz,  $\text{CDCl}_3$ )**  $\delta$ : 10.28 (s, 1H), 8.42 (s, 1H), 8.22 – 8.12 (m, 1H), 8.07 (d,  $J$  = 8.6 Hz, 2H), 7.96 (d,  $J$  = 8.6 Hz, 2H), 7.37 – 7.30 (m, 4H), 6.00 (s, 1H), 4.93 – 4.89 (m, 1H), 4.64 (d,  $J$  = 4.6 Hz, 1H), 4.51 (ddd,  $J$  = 9.2, 4.9, 2.7 Hz, 2H), 4.46 – 4.40 (m, 2H), 4.39 – 4.22 (m, 3H), 4.09 – 4.05 (m, 1H), 3.08 – 2.94 (m, 6H), 1.07 (s, 9H), 1.05 (s, 9H), 0.95 (s, 9H), 0.19 (s, 3H), 0.17 (s, 3H);  **$^{13}\text{C}$  NMR (101 MHz,  $\text{CDCl}_3$ )**  $\delta$ : 179.8, 170.7, 153.7, 149.8, 146.9, 146.8, 145.5, 145.4, 129.8, 123.8, 123.6, 120.9, 92.6, 75.9, 75.7, 74.9, 67.9, 65.0, 64.5, 49.7, 36.5, 34.9, 34.8, 27.6, 27.1, 26.0, 22.8, 20.5, 18.4, -4.2, -4.9; **HRMS (ESI):** calculated for  $\text{C}_{45}\text{H}_{63}\text{N}_8\text{O}_{13}\text{Si}_2^+$ :  $m/z$  = 979.4053  $[\text{M}+\text{H}]^+$ ; found:  $m/z$  = 979.4056.

## Compound 30a

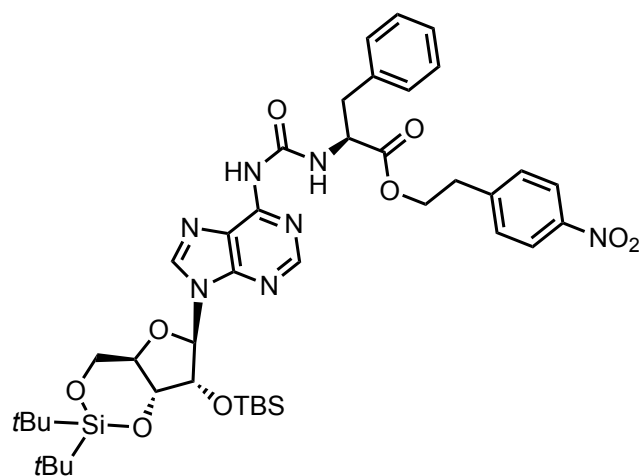

**Yield:** 68%; **IR:**  $\tilde{\nu}$  = 3190 (w), 2933 (w), 2858 (w), 1742 (w), 1702 (vs), 1612 (s), 1587 (w), 1521 (vs), 1469 (vs), 1345 (vs), 1253 (s), 1057 (s), 1000 (w), 828 (vs)  $\text{cm}^{-1}$ ;  **$^1\text{H}$  NMR (400 MHz,  $\text{CD}_2\text{Cl}_2$ )**  $\delta$ : 10.00 (d,  $J$  = 7.5 Hz, 1H), 8.94 (s, 1H), 8.37 (d,  $J$  = 1.2 Hz, 2H), 8.00 (d,  $J$  =

8.7 Hz, 2H), 7.39 – 7.26 (m, 5H), 7.21 – 7.17 (m, 2H), 6.02 (s, 1H), 4.89 – 4.76 (m, 1H), 4.60 (d,  $J = 4.6$  Hz, 1H), 4.54 – 4.46 (m, 2H), 4.40 (td,  $J = 6.5$  Hz, 1.7 Hz, 2H), 4.31 – 4.22 (m, 1H), 4.16 – 4.06 (m, 1H), 3.18 (d,  $J = 6.8$  Hz, 2H), 3.03 (t,  $J = 6.5$  Hz, 2H), 1.10 (s, 9H), 1.06 (s, 9H), 0.96 (s, 9H), 0.20 (s, 3H), 0.18 (s, 3H);  $^{13}\text{C}$  NMR (101 MHz,  $\text{CD}_2\text{Cl}_2$ )  $\delta$ : 171.5, 153.8, 150.7, 150.2, 149.8, 146.7, 145.9, 142.2, 136.4, 129.8, 129.5, 128.5, 127.1, 123.4, 120.8, 92.2, 75.8, 75.7, 74.8, 67.7, 64.6, 54.9, 37.8, 34.7, 27.3, 26.9, 25.7, 22.6, 20.2, 18.2, -4.6, -5.2; HRMS (ESI): calculated for  $\text{C}_{42}\text{H}_{60}\text{N}_7\text{O}_9\text{Si}_2^+$ :  $m/z = 862.3986$   $[\text{M}+\text{H}]^+$ ; found:  $m/z = 862.3995$   $[\text{M}+\text{H}]^+$ .

### Compound 30b

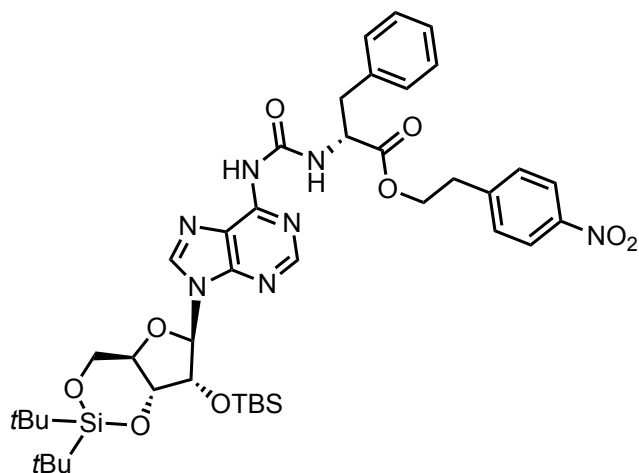

Eluent: Hex/EtOAc (4/1, v/v).

**Yield:** 71%; **IR:**  $\tilde{\nu} = 3192$  (w), 2933 (w), 2858 (w), 1740 (w), 1700 (vs), 1611 (s), 1520 (vs), 1466 (vs), 1345 (vs), 1252 (s), 1166 (w), 1139 (w), 1054 (vs), 998 (s), 893 (s), 826 (vs), 736 (vs)  $\text{cm}^{-1}$ ;  $^1\text{H}$  NMR (400 MHz,  $\text{CD}_2\text{Cl}_2$ )  $\delta$ : 10.01 (d,  $J = 7.6$  Hz, 1H), 8.96 (s, 1H), 8.37 (s, 2H), 8.00 (d,  $J = 8.7$  Hz, 1H), 7.37 – 7.22 (m, 5H), 7.22 – 7.14 (m, 2H), 6.03 (s, 1H), 4.90 – 4.81 (m, 1H), 4.61 (d,  $J = 4.5$  Hz, 1H), 4.54 – 4.45 (m, 2H), 4.39 (t,  $J = 6.4$  Hz, 2H), 4.32 – 4.21 (m, 1H), 4.16 – 4.05 (m, 1H), 3.19 (d,  $J = 6.2$  Hz, 2H), 3.02 (t,  $J = 6.4$  Hz, 2H), 1.09 (s, 9H), 1.06 (s, 9H), 0.96 (s, 9H), 0.20 (s, 3H), 0.18 (s, 3H);  $^{13}\text{C}$  NMR (101 MHz,  $\text{CD}_2\text{Cl}_2$ )  $\delta$ : 171.4, 153.6, 150.8, 150.2, 149.8, 146.7, 145.9, 141.8, 136.4, 129.8, 129.5, 128.5, 127.1, 123.4, 120.8, 92.2, 75.9, 75.7, 74.8, 67.7, 64.6, 54.9, 37.9, 34.7, 27.3, 26.8, 25.7, 22.6, 20.2, 18.2, -4.6, -5.3.; HRMS (ESI): calculated for  $\text{C}_{42}\text{H}_{60}\text{N}_7\text{O}_9\text{Si}_2^+$ :  $m/z = 862.3986$   $[\text{M}+\text{H}]^+$ ; found:  $m/z = 862.3996$   $[\text{M}+\text{H}]^+$ .

## Compound 31

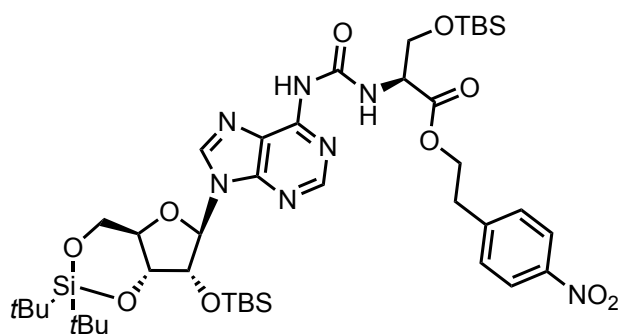

Eluent: Hex/EtOAc (1/1, v/v).

**Yield:** 85%; **IR:**  $\tilde{\nu}$  = 3238 (w), 2931 (s), 2859 (s), 1737 (s), 1701 (vs), 1610 (s), 1520 (vs), 1470 (s), 1345 (s), 1251 (s), 1136 (w), 1057 (s), 998 (w), 899 (w), 840 (s), 778 (s)  $\text{cm}^{-1}$ ;  **$^1\text{H NMR}$  (400 MHz,  $\text{CDCl}_3$ )  $\delta$ :** 10.18 (d,  $J$  = 8.3 Hz, 1H), 8.61 (s, 1H), 8.44 (s, 1H), 8.19 (s, 1H), 8.02 (d,  $J$  = 8.6 Hz, 2H), 7.35 (d,  $J$  = 8.7 Hz, 2H), 5.99 (s, 1H), 4.72 (dt,  $J$  = 8.4, 2.8 Hz, 1H), 4.61 (d,  $J$  = 4.6 Hz, 1H), 4.50 (td,  $J$  = 9.8, 4.9 Hz, 2H), 4.43 (t,  $J$  = 6.5 Hz, 2H), 4.24 (td,  $J$  = 10.0, 5.0 Hz, 1H), 4.14 (dd,  $J$  = 10.1, 2.7 Hz, 1H), 4.07 (dd,  $J$  = 10.5, 9.1 Hz, 1H), 3.91 (dd,  $J$  = 10.1, 3.1 Hz, 1H), 3.06 (t,  $J$  = 6.5 Hz, 2H), 1.08 (s, 9H), 1.05 (s, 9H), 0.94 (s, 9H), 0.88 (s, 10H), 0.18 (s, 3H), 0.16 (s, 3H);  **$^{13}\text{C NMR}$  (101 MHz,  $\text{CDCl}_3$ )  $\delta$ :** 170.6, 153.9, 151.2, 150.3, 149.8, 146.9, 145.6, 141.6, 129.8, 123.7, 121.1, 92.5, 75.9, 75.7, 74.9, 67.9, 64.8, 64.6, 55.7, 34.9, 27.6, 27.1, 26.0, 25.7, 22.8, 20.5, 18.4, 18.2, -4.2, -4.8, -5.3, -5.6; **HRMS (ESI):** calculated for  $\text{C}_{42}\text{H}_{70}\text{N}_7\text{O}_{10}\text{Si}_3^+$ :  $m/z$  = 916.4492  $[\text{M}+\text{H}]^+$ ; found:  $m/z$  = 916.4501  $[\text{M}+\text{H}]^+$ .

### General procedure for deprotection 3'-5'-silyl protecting group:

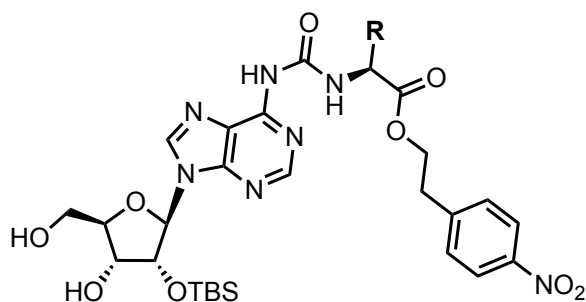

The modified adenosine (0.86 mmol) was dissolved in  $\text{CH}_2\text{Cl}_2$  under  $\text{N}_2$  atmosphere and transferred into a plastic flask. Pyridine (1 ml) was added and the solution was cooled in an ice-bath. Then  $\text{Py}^*(\text{HF})_n$  (140  $\mu\text{l}$ ) was added and the mixture was stirred at 0  $^\circ\text{C}$  for 2 h. The reaction was quenched with sat.  $\text{NaHCO}_3$  and extracted with  $\text{CH}_2\text{Cl}_2$ . Organic phase was washed with

water and dried over Na<sub>2</sub>SO<sub>4</sub>. The solvents were removed in vacuo. The crude product was purified by flash chromatography eluting with CH<sub>2</sub>Cl<sub>2</sub>/MeOH (9/1, v/v) to afford the product as a colourless foam.

### Compound 32

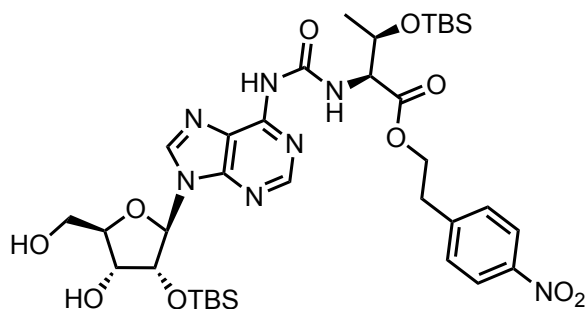

**Yield:** 95%; **IR:**  $\tilde{\nu}$  = 3244 (w), 2952 (w), 2929 (w), 2856 (w), 1736 (w), 1695 (s), 1610 (s), 1588 (s), 1520 (vs), 1469 (s), 1345 (vs), 1313 (w), 1250 (vs), 1129 (w), 1093 (s), 835 (vs), 760 (vs) cm<sup>-1</sup>; **<sup>1</sup>H NMR (400 MHz, CDCl<sub>3</sub>)**  $\delta$ : 9.90 (d,  $J$  = 9.1 Hz, 1H), 8.50 (s, 1H), 8.46 (s, 1H), 8.10 – 8.08 (m, 3H), 7.37 (d,  $J$  = 8.6 Hz, 2H), 5.85 (d,  $J$  = 7.0 Hz, 1H), 5.10 (dd,  $J$  = 7.0, 4.7 Hz, 1H), 4.59 (dd,  $J$  = 9.1, 1.5 Hz, 1H), 4.53 – 4.41 (m, 2H), 4.41 – 4.34 (m, 2H), 4.34 – 4.26 (m, 1H), 3.98 (dd,  $J$  = 13.0, 1.5 Hz, 1H), 3.78 (dd,  $J$  = 13.0, 1.5 Hz, 1H), 3.07 (t,  $J$  = 6.7 Hz, 2H), 1.24 (d,  $J$  = 6.7 Hz, 3H), 0.89 (s, 9H), 0.81 (s, 9H), 0.05 (s, 3H), -0.06 (s, 3H), -0.14 (s, 3H), -0.34 (s, 3H); **<sup>13</sup>C NMR (101 MHz, CDCl<sub>3</sub>)**  $\delta$ : 170.9, 154.0, 151.3, 150.9, 149.3, 147.1, 145.6, 143.0, 130.0, 123.9, 91.5, 87.7, 74.9, 72.7, 68.8, 65.13, 63.3, 59.8, 35.0, 25.7, 21.3, 18.1, 18.0, -4.0, -5.0, -5.1, -5.2; **HRMS (ESI):** calculated for C<sub>35</sub>H<sub>56</sub>N<sub>7</sub>O<sub>10</sub>Si<sub>2</sub><sup>+</sup>:  $m/z$  = 790.3622 [M+H]<sup>+</sup>; found:  $m/z$  = 790.3612 [M+H]<sup>+</sup>.

### Compound 33

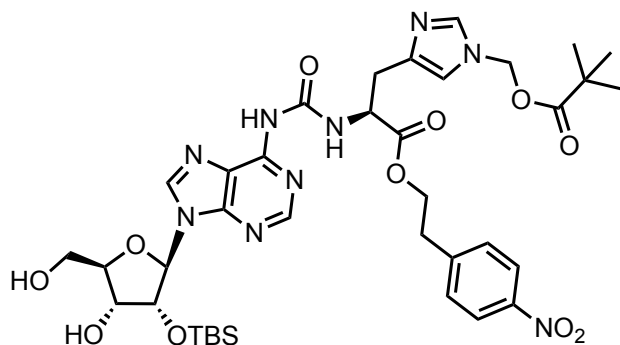

**Yield:** 75%; **IR:**  $\tilde{\nu}$  = 3854 (w), 3745 (w), 3650 (w), 3230 (w), 2930 (w), 2857 (w), 2361 (w), 2341 (w), 1740 (s), 1699 (vs), 1611 (w), 1587 (w), 1520 (vs), 1472 (s), 1395 (w), 1345 (vs), 1253 (w), 1119 (vs), 1091 (w), 1058 (w), 1030 (w), 983 (w), 914 (w), 856 (vs), 779 (vs), 747(w), 670 (w)  $\text{cm}^{-1}$ ;  **$^1\text{H}$  NMR (400 MHz,  $\text{CDCl}_3$ )  $\delta$ :** 10.05 – 9.98 (m, 1H), 8.50 (d,  $J$  = 3.1 Hz, 1H), 8.18 – 8.10 (m, 3H), 8.01 (d,  $J$  = 9.1 Hz, 1H), 7.60 (dd,  $J$  = 8.2, 1.3 Hz, 1H), 7.44 – 7.37 (m, 2H), 6.84 (d,  $J$  = 1.4 Hz, 1H), 5.99 – 5.93 (m, 1H), 5.81 (dd,  $J$  = 7.3, 5.4 Hz, 1H), 5.77 – 5.71 (m, 2H), 5.08 (dt,  $J$  = 7.3, 5.1 Hz, 1H), 4.90 (dt,  $J$  = 7.2, 5.4 Hz, 1H), 4.42 (q,  $J$  = 6.3 Hz, 2H), 4.39 – 4.34 (m, 2H), 3.98 – 3.92 (m, 1H), 3.82 – 3.72 (m, 1H), 3.23 – 3.13 (m, 2H), 3.08 (dt,  $J$  = 13.8, 6.6 Hz, 2H), 2.83 (s, 1H), 1.09 (s, 9H), 0.80 (s, 9H), -0.18 (s, 3H), -0.40 (s, 3H);  **$^{13}\text{C}$  NMR (101 MHz,  $\text{CDCl}_3$ )  $\delta$ :** 177.8, 171.8, 153.2, 151.1, 150.9, 149.3, 147.0, 145.8, 143.0, 138.2, 138.1, 130.0, 123.9, 123.1, 117.4, 91.4, 87.8, 74.7, 73.0, 67.7, 65.0, 63.5, 53.5, 38.8, 35.0, 30.6, 26.9, 25.7, 18.0, -5.1, -5.2; **HRMS (ESI):** calculated for  $\text{C}_{37}\text{H}_{52}\text{N}_9\text{O}_{11}\text{Si}^+$ :  $m/z$  = 826.3550  $[\text{M}+\text{H}]^+$ ; found:  $m/z$  = 826.3559  $[\text{M}+\text{H}]^+$ .

### Compound 34

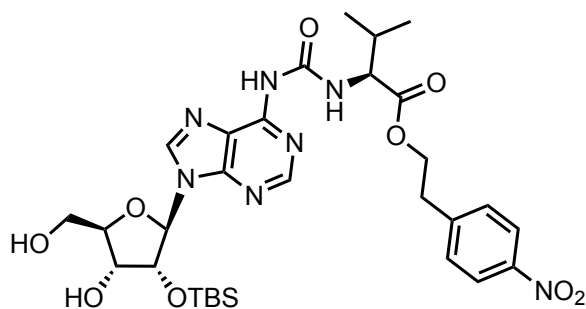

**Yield:** 95%; **IR:**  $\tilde{\nu}$  = 3245 (w), 2930 (w), 2857 (w), 1743 (s), 1695 (vs), 1590 (s), 1518 (vs), 1471 (s), 1344 (vs), 1252 (s), 1212 (w), 1188 (s), 1130 (w), 1085 (s), 836 (vs)  $\text{cm}^{-1}$ ;  **$^1\text{H}$  NMR (400 MHz,  $\text{Acetone-}d_6$ )  $\delta$ :** 10.01 (d,  $J$  = 8.4 Hz, 1H), 8.50 (s, 1H), 8.17 (s, 1H), 8.07 (d,  $J$  = 8.3 Hz, 2H), 7.28 (d,  $J$  = 8.3 Hz, 2H), 5.98 (s, 1H), 4.61 (d,  $J$  = 4.6 Hz, 1H), 4.56 – 4.38 (m, 6H), 4.20 – 4.29 (m, 1H), 4.07 (dd,  $J$  = 10.5, 9.1 Hz, 1H), 3.09 (t,  $J$  = 6.5 Hz, 2H), 1.00 (d,  $J$  = 6.5 Hz, 3H), 0.96 (d,  $J$  = 6.5 Hz, 3H), 0.95 (s, 9H), 0.18 (s, 3H), 0.16 (s, 3H);  **$^{13}\text{C}$  NMR (101 MHz,  $\text{CDCl}_3$ )  $\delta$ :** 172.2, 154.4, 151.6, 149.5, 147.0, 145.5, 143.3, 136.5, 129.9, 123.7, 122.0, 91.2, 87.6, 74.7, 72.8, 64.7, 63.4, 58.7, 35.0, 30.9, 25.6, 19.4, 17.9, -5.2, -5.3; **HRMS (ESI):** calculated for  $\text{C}_{30}\text{H}_{44}\text{N}_7\text{O}_9\text{Si}^+$ :  $m/z$  = 674.2970  $[\text{M}+\text{H}]^+$ ; found:  $m/z$  = 674.2974  $[\text{M}+\text{H}]^+$ .

### Compound 35

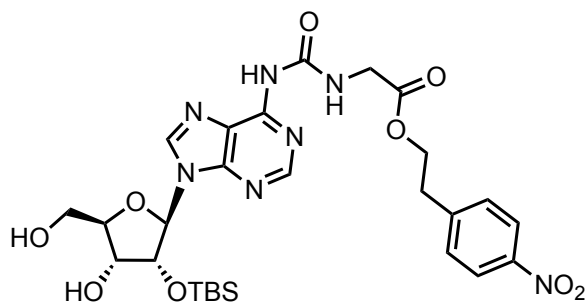

**Yield:** 97%; **IR:**  $\tilde{\nu}$  = 3250 (w), 2932 (w), 2859 (w), 1740 (s), 1680 (vs), 1595 (s), 1520 (vs), 1470 (s), 1340 (vs), 1254 (s), 1213 (w), 1168 (s), 1130 (w), 1085 (s), 836 (vs)  $\text{cm}^{-1}$ ;  **$^1\text{H}$  NMR (400 MHz,  $\text{CDCl}_3$ )**  $\delta$ : 9.92 (t,  $J$  = 5.7 Hz, 1H), 8.92 (br. s, 1H), 8.54 (s, 1H), 8.25 (s, 1H), 8.13 (d,  $J$  = 8.7 Hz, 2H), 7.39 (d,  $J$  = 8.7 Hz, 2H), 5.87 (d,  $J$  = 7.2 Hz, 1H), 5.07 (dd,  $J$  = 7.2,  $J$  = 4.7 Hz, 1H), 4.44 (t,  $J$  = 6.7 Hz, 2H), 4.37 (m, 2H), 4.20 (t,  $J$  = 5.2 Hz, 2H), 3.97 (d,  $J$  = 13.0 Hz, 1H), 3.77 (d,  $J$  = 13.0 Hz, 1H), 3.09 (t,  $J$  = 6.7 Hz, 2H), 2.94 (br. s, 1H), 0.78 (s, 9H), -0.19 (s, 3H), -0.38 (s, 3H);  **$^{13}\text{C}$  NMR (101 MHz,  $\text{CDCl}_3$ )**  $\delta$ : 169.9, 154.0, 150.8, 149.5, 147.0, 145.4, 143.6, 129.9, 123.9, 122.0, 91.2, 87.6, 74.8, 72.8, 64.9, 63.3, 42.2, 34.9, 25.6, 17.9, -5.2; **HRMS (ESI):** calculated for  $\text{C}_{27}\text{H}_{37}\text{N}_7\text{O}_9\text{Si}^+$ :  $m/z$  = 632.2495  $[\text{M} + \text{H}]^+$ ; found  $m/z$  = 632.2492.

### Compound 36

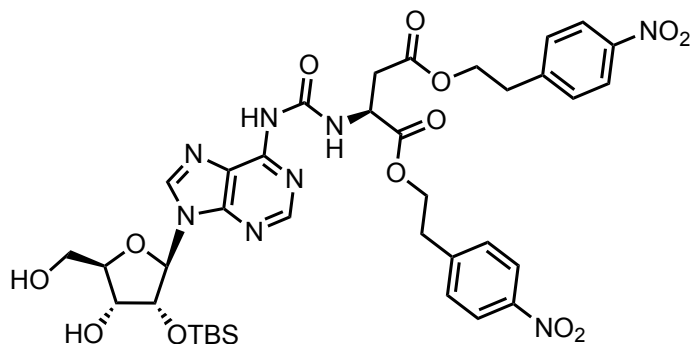

**Yield:** 98%; **IR:**  $\tilde{\nu}$  = 3229 (w), 2953 (w), 2929 (w), 2857 (w), 1735 (s), 1693 (s), 1607 (s), 1589 (s), 1517 (vs), 1469 (s), 1391 (w), 1310 (vs), 1292 (w), 1251 (w), 1210 (w), 835 (s)  $\text{cm}^{-1}$ ;  **$^1\text{H}$  NMR (400 MHz,  $\text{Acetone-}d_6$ )**  $\delta$ : 10.30 (d,  $J$  = 7.9 Hz, 1H), 9.41 (s, 1H), 8.77 (s, 1H), 8.50 (s, 1H), 8.10 (d,  $J$  = 8.8 Hz, 2H), 8.06 (d,  $J$  = 8.8 Hz, 2H), 7.54 (dd,  $J$  = 8.7, 7.4 Hz, 4H), 6.12 (d,  $J$  = 5.8 Hz, 1H), 5.07 (s, 1H), 5.00 – 4.95 (m, 1H), 4.90 (dt,  $J$  = 7.9, 5.3 Hz, 1H), 4.49 – 4.31 (m, 5H), 4.23 (q,  $J$  = 2.4 Hz, 1H), 4.06 (s, 1H), 3.92 (dd,  $J$  = 12.4, 2.1 Hz, 1H), 3.79 (d,  $J$  = 12.2 Hz, 1H), 3.10 (dt,  $J$  = 12.6, 6.4 Hz, 4H), 3.02 (d,  $J$  = 5.5 Hz, 2H), 0.79 (s, 9H), -0.08 (s, 3H), -0.21 (s,

3H);  $^{13}\text{C}$  NMR (101 MHz, Acetone- $d_6$ )  $\delta$ : 171.3, 171.2, 154.2, 151.4, 150.9, 150.6, 147.6, 147.4, 147.2, 144.3, 136.6, 131.0, 124.1, 121.9, 90.6, 87.6, 76.8, 72.4, 65.8, 65.1, 62.9, 50.6, 37.1, 35.2, 27.2, 26.0, 18.6, -4.9, -5.1; HRMS (ESI): calculated for  $\text{C}_{37}\text{H}_{47}\text{N}_8\text{O}_{13}\text{Si}^+$ :  $m/z$  = 839.3032  $[\text{M}+\text{H}]^+$ ; found:  $m/z$  = 839.3041  $[\text{M}+\text{H}]^+$ .

### Compound 37a

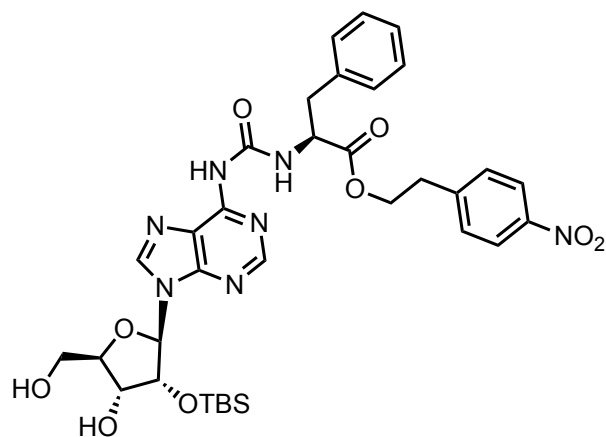

**Yield:** 80%; **IR:**  $\tilde{\nu}$  = 3240 (w), 2929 (w), 2857 (w), 1742 (w), 1699 (vs), 1613 (s), 1520 (vs), 1471 (s), 1345 (vs), 1255 (w), 839 (s)  $\text{cm}^{-1}$ ;  $^1\text{H}$  NMR (400 MHz,  $\text{CD}_2\text{Cl}_2$ )  $\delta$ : 9.83 (d,  $J$  = 7.4 Hz, 1H), 8.63 (s, 1H), 8.40 (s, 1H), 8.18 (s, 1H), 8.10 (d,  $J$  = 8.7 Hz, 2H), 7.38 (d,  $J$  = 8.7 Hz, 2H), 7.33 – 7.21 (m, 2H), 7.19 – 7.14 (m, 2H), 5.87 (d,  $J$  = 7.2 Hz, 1H), 5.64 (dd,  $J$  = 11.6 Hz,  $J$  = 2.3 Hz, 1H), 5.07 (dd,  $J$  = 7.2 Hz,  $J$  = 4.7 Hz, 1H), 4.87 – 4.80 (m, 1H), 4.45 – 4.32 (m, 4H), 3.93 (d,  $J$  = 12.9 Hz, 1H), 3.79 – 3.69 (m, 1H), 3.17 (d,  $J$  = 6.2 Hz, 2H), 3.05 (t,  $J$  = 6.6 Hz, 2H), 2.93 (s, 1H), 0.79 (s, 9H), -0.19 (s, 3H), -0.38 (s, 3H);  $^{13}\text{C}$  NMR (101 MHz,  $\text{CD}_2\text{Cl}_2$ )  $\delta$ : 171.4, 153.1, 150.7, 150.5, 149.8, 149.3, 146.8, 145.8, 143.3, 136.3, 129.8, 129.4, 128.3, 127.2, 123.5, 91.0, 87.6, 74.8, 72.7, 64.7, 63.1, 54.9, 37.8, 34.7, 25.3, 17.7, -5.6, -5.7; HRMS (ESI): calculated for  $\text{C}_{34}\text{H}_{44}\text{N}_7\text{O}_9\text{Si}^+$ :  $m/z$  = 722.2965  $[\text{M}+\text{H}]^+$ ; found:  $m/z$  = 722.2971  $[\text{M}+\text{H}]^+$ .

### Compound 37b

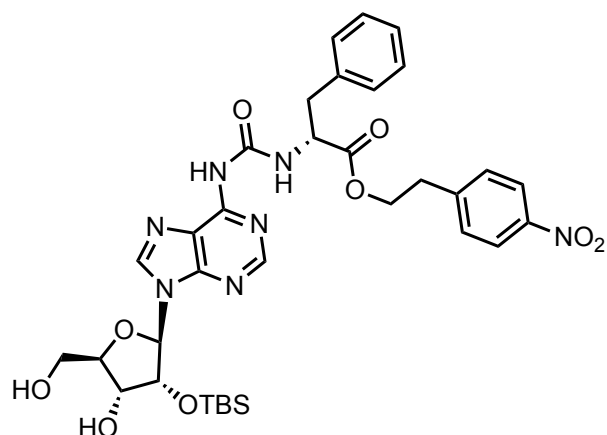

**Yield:** 78%; **IR:**  $\tilde{\nu}$  = 3229 (w), 2930 (w), 2858 (w), 1740 (w), 1697 (vs), 1612 (s), 1519 (vs), 1470 (s), 1345 (vs), 1254 (s), 1216 (w), 838 (vs), 781 (s), 736 (vs), 700 (s)  $\text{cm}^{-1}$ ;  **$^1\text{H NMR}$  (400 MHz,  $\text{CD}_2\text{Cl}_2$ )  $\delta$ :** 9.79 (br. s, 1H), 8.58 (br. s, 1H), 8.39 (s, 1H), 8.17 (t,  $J$  = 4.0 Hz, 1H), 8.05 (d,  $J$  = 8.7 Hz, 2H), 7.35 (d,  $J$  = 8.7 Hz, 2H), 7.32 – 7.23 (m, 2H), 7.21-7.15 (m, 2H), 5.87 (d,  $J$  = 7.1 Hz, 1H), 5.61 (dd,  $J$  = 11.6 Hz, 2.4 Hz, 1H), 5.05 (dd,  $J$  = 7.2 Hz, 4.7 Hz, 1H), 4.82 (q,  $J$  = 6.2 Hz, 1H), 4.46 – 4.30 (m, 4H), 3.93 (d,  $J$  = 12.9 Hz, 1H), 3.79 – 3.68 (m, 1H), 3.17 (d,  $J$  = 6.2 Hz, 2H), 3.03 (t,  $J$  = 6.5 Hz, 3H), 2.88 (s, 1H), 0.80 (s, 9H), -0.17 (s, 3H), -0.36 (s, 3H);  **$^{13}\text{C NMR}$  (101 MHz,  $\text{CD}_2\text{Cl}_2$ )  $\delta$ :** 171.4, 153.1, 150.7, 150.5, 149.8, 149.3, 146.8, 145.8, 143.3, 136.3, 129.8, 129.4, 128.5, 128.3, 127.2, 123.5, 91.0, 87.6, 74.8, 72.7, 64.7, 63.1, 54.9, 37.8, 34.7, 25.3, 17.7, -5.6, -5.7; **HRMS (ESI):** calculated for  $\text{C}_{34}\text{H}_{43}\text{N}_7\text{O}_9\text{SiNa}^+$ :  $m/z$  = 744.2784  $[\text{M}+\text{Na}]^+$ ; found:  $m/z$  = 744.2776  $[\text{M}+\text{Na}]^+$ .

### Compound 38

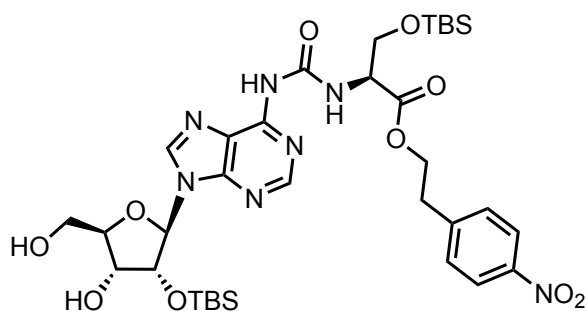

**Yield:** 96%; **IR:**  $\tilde{\nu}$  = 3240 (w), 2950 (w), 2927 (w), 2856 (w), 1737 (w), 1695 (s), 1611 (s), 1589 (s), 1520 (vs), 1469 (s), 1346 (vs), 1313 (w), 1250 (vs), 1130 (w), 1093 (s), 835 (vs), 780 (vs)  $\text{cm}^{-1}$ ;  **$^1\text{H NMR}$  (400 MHz,  $\text{Acetone-}d_6$ )  $\delta$ :** 10.11 (d,  $J$  = 8.2 Hz, 1H), 9.13 (s, 1H), 8.72 (s, 1H), 8.52 (s, 1H), 8.11 (d,  $J$  = 8.7 Hz, 2H), 7.59 (d,  $J$  = 8.7 Hz, 2H), 6.13 (d,  $J$  = 6.1 Hz, 1H), 5.07 (dd,  $J$  = 8.7, 3.8 Hz, 1H), 4.99 (dd,  $J$  = 6.1, 4.7 Hz, 1H), 4.66 (dt,  $J$  = 8.3, 3.0 Hz, 1H), 4.45 (td,  $J$



= 6.5, 1.2 Hz, 2H), 4.39 (td,  $J = 4.3, 2.5$  Hz, 1H), 4.22 (p,  $J = 2.8$  Hz, 1H), 4.15 (dd,  $J = 10.3, 2.9$  Hz, 1H), 4.04 (d,  $J = 3.8$  Hz, 1H), 3.98 (dd,  $J = 10.2, 3.2$  Hz, 1H), 3.94 – 3.87 (m, 1H), 3.78 (ddd,  $J = 12.4, 8.5, 2.5$  Hz, 1H), 3.16 (t,  $J = 6.3$  Hz, 2H), 0.88 (s, 9H), 0.79 (s, 9H), 0.07 (s, 3H), 0.02 (s, 3H), -0.08 (s, 3H), -0.23 (s, 3H);  $^{13}\text{C}$  NMR (101 MHz, Acetone- $d_6$ )  $\delta$ : 171.0, 154.1, 151.4, 151.0, 147.4, 144.1, 131.1, 124.2, 122.1, 90.5, 87.8, 76.8, 72.6, 65.7, 64.3, 63.0, 56.4, 35.3, 27.2, 26.1, 26.0, 18.7, 18.6, -4.9, -5.2, -5.3, -5.6; HRMS (ESI): calculated for  $\text{C}_{34}\text{H}_{54}\text{N}_7\text{O}_{10}\text{Si}_2\text{Na}^+$ :  $m/z = 798.3290$   $[\text{M}+\text{Na}]^+$ ; found:  $m/z = 798.3288$   $[\text{M}+\text{Na}]^+$ .

### General procedure for DMT protection:

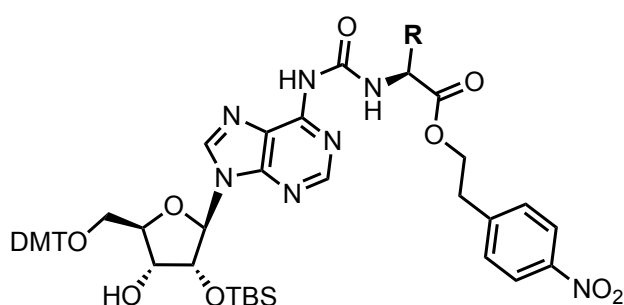

The 3'-5'-deprotected adenosine derivative (1 eq.) was dissolved in pyridine under  $\text{N}_2$  atmosphere. DMT chloride (1.5 eq.) was added in two portions and the mixture was stirred at room temperature overnight. Then the volatiles were evaporated, and crude product was purified by flash chromatography eluting with  $\text{CH}_2\text{Cl}_2/\text{MeOH}$  (10/1/, v/v) with an addition of 0.1% of pyridine, unless otherwise specified, to afford the DMT protected derivative as white foam.

### Compound 39

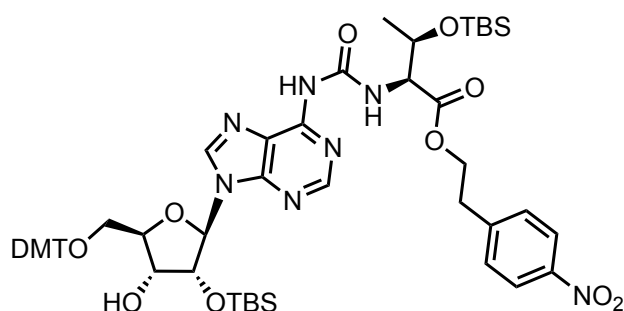

**Yield:** 90%; **IR:**  $\tilde{\nu} = 3350$  (w), 2930 (w), 2856 (w), 1729 (w), 1684 (s), 1608 (s), 1521 (vs), 1464 (s), 1345 (vs), 1248 (vs), 1174 (w), 1094 (w), 10033 (s), 827 (vs), 777 (vs)  $\text{cm}^{-1}$ ;  $^1\text{H}$  NMR (400 MHz, Acetone- $d_6$ )  $\delta$ : 10.00 (d,  $J = 9.0$  Hz, 1H), 8.95 (s, 1H), 8.55 (s, 1H), 8.40 (s, 1H), 7.98 (d,  $J = 8.7$  Hz, 2H), 7.59 – 7.46 (m, 4H), 7.35 (dd,  $J = 9.0, 3.0$  Hz, 4H), 7.28 – 7.13 (m, 4H), 6.83

(dd,  $J = 9.0, 3.0$  Hz, 4H), 6.16 (d,  $J = 4.6$  Hz, 1H), 5.16 (t,  $J = 4.6$  Hz, 1H), 4.61 – 4.48 (m, 3H), 4.45 – 4.35 (m, 2H), 4.33 – 4.26 (m, 1H), 3.99 (d,  $J = 5.8$  Hz, 1H), 3.75 (s, 6H), 3.51 – 3.44 (m, 2H), 3.12 (t,  $J = 6.2$  Hz, 2H), 1.27 (d,  $J = 6.2$  Hz, 3H), 0.91 (s, 9H), 0.85 (s, 9H), 0.09 (s, 3H), 0.06 (s, 3H), -0.05 (s, 6H);  $^{13}\text{C}$  NMR (101 MHz, Acetone- $d_6$ )  $\delta$ : 171.6, 159.6, 154.8, 151.5, 151.3, 147.5, 146.1, 136.7, 131.1, 130.9, 129.7, 129.0, 128.5, 127.5, 126.1, 124.1, 121.9, 113.8, 90.2, 87.1, 84.8, 76.3, 71.9, 69.6, 65.6, 64.4, 60.3, 55.5, 35.3, 26.1, 25.9, 21.5, 18.7, 18.5, -4.1, -4.6, -4.8, -5.2; HRMS (ESI): calculated for  $\text{C}_{56}\text{H}_{74}\text{N}_7\text{O}_{12}\text{Si}_2^+$ :  $m/z = 1092.4929$  [M+H] $^+$ ; found:  $m/z = 1092.4937$  [M+H] $^+$ .

### Compound 40

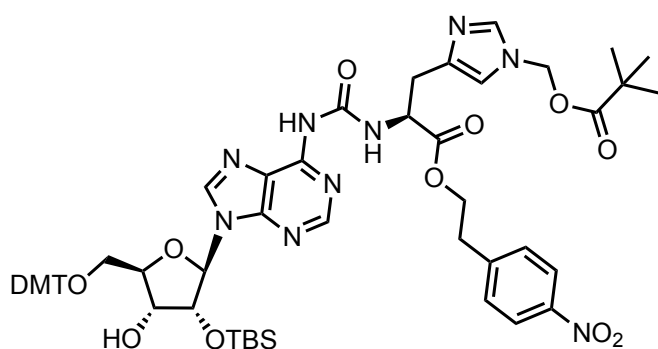

Eluent: 10%  $\text{CH}_2\text{Cl}_2$  in EtOAc to pure EtOAc containing 0.1% of pyridine.

**Yield:** 85%; **IR:**  $\tilde{\nu} = 3854$  (w), 3746 (w), 3650 (w), 3630 (w), 2931 (w), 2361 (w), 2341 (w), 1740 (s), 1700 (vs), 1654 (w), 1609 (s), 1587 (w), 1559 (w), 1508 (vs), 1472 (s), 1396 (w), 1345 (s), 1300 (w), 1250 (vs), 1176 (s), 1118 (vs), 1032 (vs), 986 (w), 912 (w), 835 (vs), 781 (s), 751 (w), 700 (w)  $\text{cm}^{-1}$ ;  $^1\text{H}$  NMR (400 MHz, Acetone- $d_6$ )  $\delta$ : 10.11 – 10.06 (m, 1H), 8.61 – 8.55 (m, 1H), 8.47 (s, 1H), 8.45 (s, 1H), 8.13 – 8.05 (m, 2H), 7.71 (d,  $J = 1.4$  Hz, 1H), 7.63 – 7.55 (m, 2H), 7.53 – 7.46 (m, 2H), 7.40 – 7.32 (m, 4H), 7.28 (td,  $J = 8.2, 7.7, 2.0$  Hz, 2H), 7.25 – 7.18 (m, 1H), 7.06 (s, 1H), 6.88 – 6.81 (m, 4H), 6.13 (d,  $J = 4.4$  Hz, 1H), 5.88 (s, 2H), 5.10 (t,  $J = 4.6$  Hz, 1H), 4.75 (dq,  $J = 8.0, 4.2, 3.3$  Hz, 1H), 4.56 – 4.51 (m, 1H), 4.47 – 4.36 (m, 2H), 4.30 – 4.25 (m, 1H), 4.03 – 3.93 (m, 1H), 3.77 (s, 3H), 3.76 (s, 3H), 3.50 – 3.40 (m, 2H), 3.16 – 3.11 (m, 2H), 3.12 – 3.04 (m, 2H), 1.05 (s, 9H), 0.86 (s, 9H), 0.06 (s, 3H), -0.04 (s, 3H);  $^{13}\text{C}$  NMR (101 MHz, Acetone- $d_6$ )  $\delta$ : 177.9, 172.1, 159.6, 153.9, 151.7, 151.3, 147.7, 147.6, 146.1, 143.3, 139.2, 138.8, 136.7, 131.1, 131.0, 130.0, 129.0, 128.6, 127.6, 124.6, 124.1, 118.2, 113.9, 90.1, 87.1, 84.7, 76.4, 71.9, 71.8, 68.8, 66.2, 64.4, 55.5, 39.2, 35.3, 31.0, 27.0, 26.1, 18.7, -4.6, -4.8; HRMS (ESI): calculated for  $\text{C}_{58}\text{H}_{70}\text{N}_9\text{O}_{13}\text{Si}^+$ :  $m/z = 1128.4857$  [M+H] $^+$ ; found:  $m/z = 1128.4885$  [M+H] $^+$ .

## Compound 41

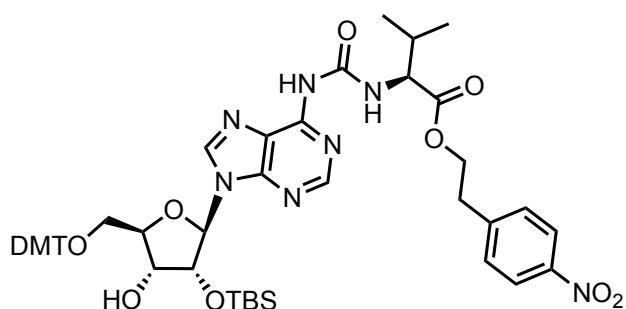

**Yield:** 70%; **IR:**  $\tilde{\nu}$  = 2929 (w), 1735 (w), 1684 (w), 1569 (s), 1508 (vs), 1464 (s), 1344 (s), 1249 (vs), 1176 (w), 1015 (s), 800 (vs) 749 (s)  $\text{cm}^{-1}$ ;  **$^1\text{H NMR}$  (400 MHz, Acetone- $d_6$ )  $\delta$ :** 10.02 (d,  $J$  = 9.0 Hz, 1H), 8.55 (s, 1H), 8.51 (s, 1H), 8.11 (d,  $J$  = 8.7 Hz, 2H), 7.59 (d,  $J$  = 8.7 Hz, 2H), 7.52 – 7.47 (m, 2H), 7.37 (dd,  $J$  = 9.0, 2.2 Hz, 4H), 7.30 – 7.13 (m, 4H), 6.86 – 6.82 (m, 4H), 6.16 (d,  $J$  = 4.6 Hz, 1H), 5.16 (t,  $J$  = 4.6 Hz, 1H), 4.57 – 4.39 (m, 5H), 4.30 (q,  $J$  = 4.6 Hz, 1H), 4.00 (d,  $J$  = 5.8 Hz, 1H), 3.76 (s, 6H), 3.47 (d,  $J$  = 4.2 Hz, 2H), 3.16 (t,  $J$  = 6.5 Hz, 2H), 2.31 – 2.30 (m, 1H), 0.99 (d,  $J$  = 6.5 Hz, 3H), 0.95 (d,  $J$  = 6.5 Hz, 3H), 0.85 (s, 9H), 0.06 (s, 3H), -0.04 (s, 3H);  **$^{13}\text{C NMR}$  (101 MHz, Acetone- $d_6$ )  $\delta$ :** 172.2, 159.5, 154.3, 151.6, 151.3, 147.4, 146.1, 143.5, 136.6, 131.0, 130.0, 128.9, 128.9, 127.5, 126.1, 124.2, 121.7, 113.8, 90.3, 87.0, 84.7, 76.4, 71.9, 65.2, 64.3, 59.5, 55.4, 35.3, 31.5, 26.1, 19.6, 18.7, 18.2, -4.6, -4.8; **HRMS (ESI):** calculated for  $\text{C}_{51}\text{H}_{62}\text{N}_7\text{O}_{11}\text{Si}^+$ :  $m/z$  = 976.4277  $[\text{M}+\text{H}]^+$ ; found:  $m/z$  = 976.4287  $[\text{M}+\text{H}]^+$ .

## Compound 42

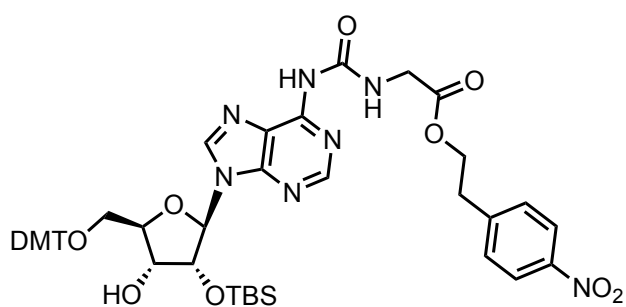

**Yield:** 85%; **IR:**  $\tilde{\nu}$  = 2931 (w), 1748 (w), 1703 (s), 1609 (s), 1588 (w), 1509 (s), 1469 (s), 1345 (vs), 1250 (vs), 1177 (vs), 1035 (w), 835 (s)  $\text{cm}^{-1}$ ;  **$^1\text{H NMR}$  (400 MHz, Acetone- $d_6$ )  $\delta$ :** 9.93 (t,  $J$  = 5.5 Hz, 1H), 9.05 (br. s, 1H), 8.58 (s, 1H), 8.46 (s, 1H), 8.11 (d,  $J$  = 8.7 Hz, 2H), 7.58 (d,  $J$  = 8.7 Hz, 2H), 7.54 – 7.47 (m, 2H), 7.41 – 7.33 (m, 4H), 7.31 – 7.23 (m, 2H), 7.23 – 7.16 (m, 1H), 6.88 – 6.78 (m, 4H), 6.16 (d,  $J$  = 4.4 Hz, 1H), 5.10 (dd,  $J$  = 4.7 Hz, 1H), 4.53 (t,  $J$  = 5.1 Hz, 1H), 4.44 (t,  $J$  = 6.4 Hz, 2H), 4.30 (dt,  $J$  = 4.4 Hz, 1H), 4.13 (d,  $J$  = 5.5 Hz, 2H), 4.00 (d,  $J$  = 5.7 Hz,

1H), 3.75 (s, 6H), 3.53 – 3.42 (m, 2H), 3.13 (t,  $J = 6.4$  Hz, 2H), 0.85 (s, 9H), 0.05 (s, 3H), -0.05 (s, 3H);  $^{13}\text{C}$  NMR (101 MHz, Acetone- $d_6$ )  $\delta$ : 170.6, 159.6, 154.6, 151.7, 151.3, 151.2, 147.6, 147.4, 146.1, 143.6, 136.7, 131.1, 130.9, 129.1, 129.0, 128.6, 127.5, 124.2, 121.7, 113.8, 90.0, 87.1, 84.8, 76.4, 72.0, 65.2, 64.4, 55.5, 42.6, 35.3, 26.1, 18.7, -4.7, -4.8; HRMS (ESI): calculated for  $\text{C}_{48}\text{H}_{55}\text{N}_7\text{O}_{11}\text{Si}^+$ :  $m/z = 934.3802$   $[\text{M} + \text{H}]^+$ ; found:  $m/z = 934.3812$   $[\text{M} + \text{H}]^+$ .

### Compound 43

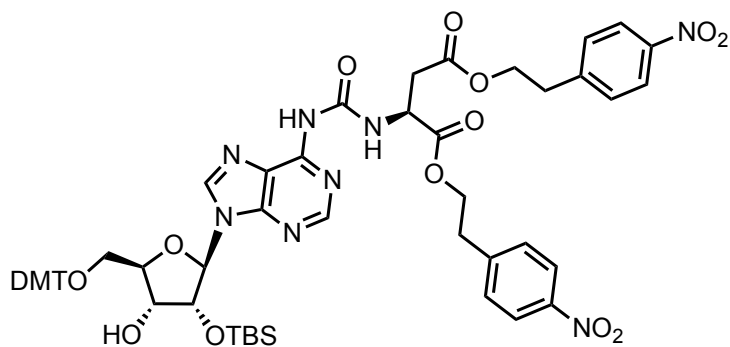

**Yield:** 95%; **IR:**  $\tilde{\nu} = 2930$  (w), 1734 (s), 1698 (s), 1607 (s), 1509 (vs), 1466 (s), 1370 (vs), 1248 (s), 1174 (s), 1032 (s), 829 (vs), 699 (s)  $\text{cm}^{-1}$ ;  $^1\text{H}$  NMR (400 MHz, Acetone- $d_6$ )  $\delta$ : 10.29 (d,  $J = 7.9$  Hz, 1H), 9.18 (s, 1H), 8.60 (s, 1H), 8.42 (s, 1H), 8.10 – 8.04 (m, 4H), 7.58 – 7.51 (m, 4H), 7.39 – 7.36 (m, 4H), 7.30 – 7.25 (m, 2H), 7.21 – 7.18 (m, 2H), 6.86 – 6.82 (m, 5H), 6.17 (d,  $J = 4.2$  Hz, 1H), 5.10 (t,  $J = 4.5$  Hz, 1H), 4.85 (dt,  $J = 7.9, 5.2$  Hz, 1H), 4.56 (q,  $J = 5.2$  Hz, 1H), 4.46 – 4.28 (m, 5H), 4.02 (d,  $J = 5.9$  Hz, 1H), 3.75 (d,  $J = 2.1$  Hz, 6H), 3.53 – 3.44 (m, 2H), 3.13 – 3.06 (m, 4H), 3.00 – 2.96 (m, 2H), 0.86 (s, 9H), 0.07 (s, 3H), 0.03 (s, 3H);  $^{13}\text{C}$  NMR (101 MHz, Acetone- $d_6$ )  $\delta$ : 171.3, 171.2, 159.5, 154.2, 151.5, 150.6, 147.4, 147.2, 146.1, 143.6, 136.7, 131.0, 130.0, 129.0, 128.6, 127.5, 124.2, 113.8, 90.1, 87.0, 84.6, 76.4, 71.8, 65.7, 65.1, 64.3, 55.4, 50.6, 37.1, 35.2, 26.1, 18.6, -4.6, -4.8; HRMS (ESI): calculated for  $\text{C}_{58}\text{H}_{64}\text{N}_8\text{O}_{15}\text{SiNa}^+$ :  $m/z = 1163.4158$   $[\text{M} + \text{Na}]^+$ ; found:  $m/z = 1163.4159$   $[\text{M} + \text{Na}]^+$ .

### Compound 44a

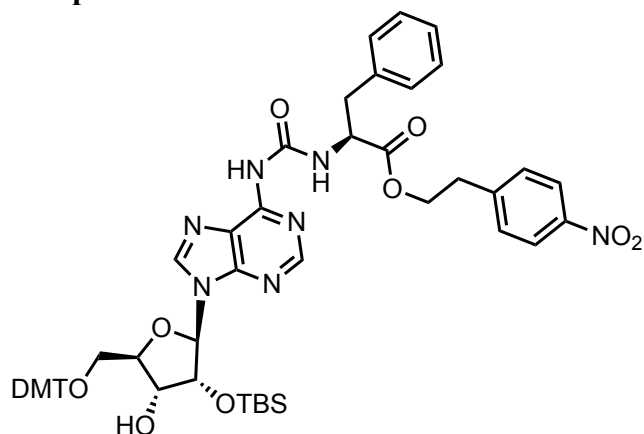

Eluent: CH<sub>2</sub>Cl<sub>2</sub>/MeOH (20/1, v/v).

**Yield:** 82%; **IR:**  $\tilde{\nu}$  = 3245 (w), 2952 (w), 2931 (w), 1741 (w), 1699 (s), 1608 (s), 1587 (w), 1519 (s), 1509 (s), 1469 (w), 1345 (s), 1249 (s), 1176 (s), 1034 (w), 834 (s), 783 (w), 735 (vs), 701 (vs) cm<sup>-1</sup>; **<sup>1</sup>H NMR (400 MHz, CD<sub>2</sub>Cl<sub>2</sub>)  $\delta$ :** 9.83 (d, *J* = 7.5 Hz, 1H), 8.29 (s, 1H), 8.17 (s, 1H), 8.06 (d, *J* = 8.7 Hz, 2H), 8.00 (s, 1H), 7.46 (d, *J* = 6.8 Hz, 2H), 7.38 – 7.32 (m, 7H), 7.31 – 7.20 (m, 7H), 7.18 – 7.14 (m, 2H), 6.82 (d, *J* = 8.9 Hz, 4H), 6.02 (d, *J* = 5.0 Hz, 1H), 5.02 (t, *J* = 5.0 Hz, 1H), 4.80 (q, *J* = 6.3 Hz, 1H), 4.44 – 4.32 (m, 3H), 4.24 (q, *J* = 3.8 Hz, 1H), 3.77 (s, 6H), 3.48 (dd, *J* = 10.7 Hz, *J* = 3.2 Hz, 1H), 3.39 (dd, *J* = 10.7 Hz, *J* = 4.3 Hz, 1H), 3.16 (d, *J* = 6.3 Hz, 2H), 3.03 (t, *J* = 6.5 Hz, 2H), 2.67 (d, *J* = 4.7 Hz, 1H), 0.85 (s, 9H), 0.01 (s, 3H), -0.12 (s, 3H); **<sup>13</sup>C NMR (101 MHz, CD<sub>2</sub>Cl<sub>2</sub>)  $\delta$ :** 171.5, 153.3, 150.8, 150.6, 149.8, 149.4, 146.8, 145.8, 143.6, 136.2, 135.9, 129.9, 129.4, 128.5, 128.3, 127.2, 123.7, 123.6, 121.8, 91.0, 87.5, 74.8, 72.7, 64.8, 63.1, 54.8, 37.8, 34.7, 25.3, 17.7, -5.7; **HRMS (ESI):** calculated for C<sub>55</sub>H<sub>62</sub>N<sub>7</sub>O<sub>11</sub>Si<sup>+</sup>: *m/z* = 1024.4271 [M+H]<sup>+</sup>; found: *m/z* = 1024.429 [M+H]<sup>+</sup>.

### Compound 44b

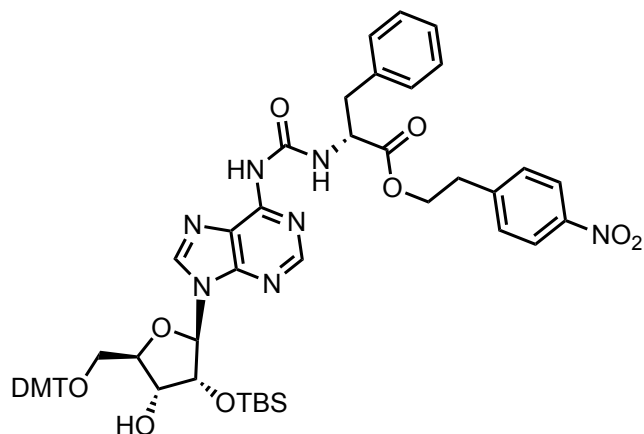

Eluent: CH<sub>2</sub>Cl<sub>2</sub>/MeOH (20/1, v/v).

**Yield:** 85%; **IR:**  $\tilde{\nu}$  = 3231 (w), 2930 (w), 2858 (w), 1741 (w), 1697 (s), 1612 (s), 1587 (w), 1518 (vs), 1470 (s), 1344 (vs), 1253 (w), 1180 (w), 1134 (w), 1085 (w), 836 (s), 780 (s), 734 (vs), 698 (vs)  $\text{cm}^{-1}$ ;  **$^1\text{H}$  NMR (400 MHz,  $\text{CD}_2\text{Cl}_2$ )  $\delta$ :** 9.83 (d,  $J$  = 7.5 Hz, 1H), 8.58 (br. s, 1H), 8.32 (s, 1H), 8.19 (s, 1H), 8.06 (d,  $J$  = 8.7 Hz, 2H), 7.99 (s, 1H), 7.46 (d,  $J$  = 6.9 Hz, 2H), 7.38 – 7.31 (m, 7H), 7.31 – 7.21 (m, 7H), 7.20 – 7.16 (m, 2H), 6.82 (d,  $J$  = 8.9 Hz, 4H), 6.05 (d,  $J$  = 4.7 Hz, 1H), 4.94 (t,  $J$  = 5.0 Hz, 1H), 4.81 (q,  $J$  = 6.3 Hz, 1H), 4.44 – 4.33 (m, 3H), 4.24 (q,  $J$  = 3.8 Hz, 1H), 3.77 (s, 6H), 3.48 (dd,  $J$  = 10.7 Hz, 3.1 Hz, 1H), 3.41 (dd,  $J$  = 10.7 Hz, 4.2 Hz, 1H), 3.16 (d,  $J$  = 6.9 Hz, 2H), 3.03 (t,  $J$  = 6.5 Hz, 2H), 2.66 (d,  $J$  = 5.0 Hz, 1H), 0.86 (s, 9H), 0.02 (s, 3H), -0.09 (s, 3H);  **$^{13}\text{C}$  NMR (101 MHz,  $\text{CD}_2\text{Cl}_2$ )  $\delta$ :** 171.4, 153.4, 150.7, 150.5, 149.8, 149.4, 146.8, 145.9, 143.7, 136.3, 129.9, 129.5, 128.5, 128.3, 127.2, 123.5, 123.5, 121.8, 91.0, 87.5, 74.9, 72.7, 64.8, 63.1, 54.9, 37.8, 34.7, 25.3, 17.8, -5.6; **HRMS (ESI):** calculated for  $\text{C}_{55}\text{H}_{62}\text{N}_7\text{O}_{11}\text{Si}^+$ :  $m/z$  = 1024.4271  $[\text{M}+\text{H}]^+$ ; found:  $m/z$  = 1024.4291  $[\text{M}+\text{H}]^+$ .

#### Compound 45

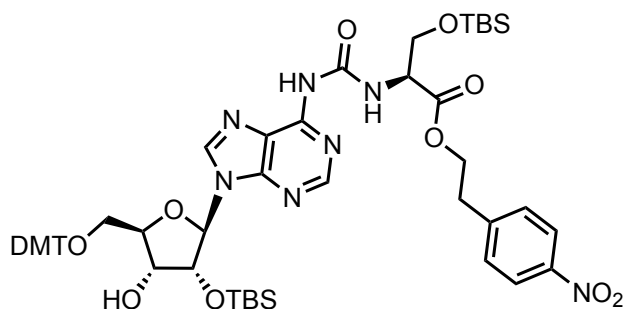

**Yield:** 90%; **IR:**  $\tilde{\nu}$  = 2930 (w), 1740 (s), 1694 (s), 1607 (w), 1582 (w), 1519 (vs), 1465 (w), 1345 (s), 1249 (s), 1176 (w), 1110 (w), 1034 (w), 820 (vs), 778 (s), 699 (w)  $\text{cm}^{-1}$ ;  **$^1\text{H}$  NMR (400 MHz, Acetone- $d_6$ )  $\delta$ :** 10.13 (d,  $J$  = 8.2 Hz, 1H), 8.99 (s, 1H), 8.58 (s, 1H), 8.44 (s, 1H), 8.09 (d,  $J$  = 8.7 Hz, 2H), 7.58 (d,  $J$  = 8.7 Hz, 2H), 7.51 (dd,  $J$  = 8.4, 1.3 Hz, 2H), 7.39 (d,  $J$  = 2.5 Hz, 2H), 7.37 (d,  $J$  = 2.4 Hz, 2H), 7.32 – 7.18 (m, 4H), 6.87 – 6.83 (m, 4H), 6.18 (d,  $J$  = 4.7 Hz, 1H), 5.13 (t,  $J$  = 5.0 Hz, 1H), 4.62 (dt,  $J$  = 8.2, 2.8 Hz, 1H), 4.53 (q,  $J$  = 5.0 Hz, 1H), 4.45 (t,  $J$  = 6.3 Hz, 2H), 4.30 (td,  $J$  = 4.6, 3.4 Hz, 1H), 4.14 (dd,  $J$  = 10.2, 2.8 Hz, 1H), 3.96 (dd,  $J$  = 10.2, 2.8 Hz, 1H), 3.77 (s, 6H), 3.48 (qd,  $J$  = 10.5, 4.1 Hz, 2H), 3.16 (t,  $J$  = 6.3 Hz, 2H), 0.89 (s, 9H), 0.85 (s, 9H), 0.07 (s, 3H), 0.06 (s, 3H), 0.03 (s, 3H), -0.06 (s, 3H);  **$^{13}\text{C}$  NMR (101 MHz, Acetone- $d_6$ )  $\delta$ :** 170.0, 159.5, 154.1, 151.6, 150.6, 147.4, 146.1, 143.6, 136.7, 131.1, 130.9, 129.0, 128.6, 127.6, 124.6, 124.2, 121.8, 113.8, 89.9, 87.1, 84.9, 76.5, 72.0, 65.8, 64.3, 56.4, 55.4, 35.3, 27.2, 26.1, 18.7, 18.4, -4.6, -4.9, -5.3, -5.5; **HRMS (ESI):** calculated for  $\text{C}_{55}\text{H}_{71}\text{N}_7\text{O}_{12}\text{Si}_2\text{Na}^+$ :  $m/z$  = 1100.4597  $[\text{M}+\text{Na}]^+$ ; found:  $m/z$  = 1100.4620  $[\text{M}+\text{Na}]^+$ .

## General synthesis of RNA phosphoramidites

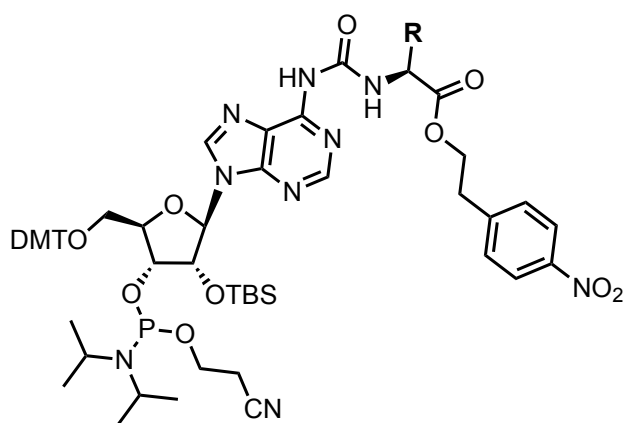

In an oven-dried flask under argon atmosphere, 5'-DMT protected compound (1 eq.) was dissolved in  $\text{CH}_2\text{Cl}_2$  and cooled to 0 °C. Hünig's base (4 eq.) was added dropwise followed by the addition of 2-cyanoethyl *N,N*-diisopropylchlorophosphoramidite (2.5 eq.). The solution was stirred at room temperature for 2 h. The reaction was quenched by addition of sat.  $\text{NaHCO}_3$  solution, and then extracted three times with  $\text{CH}_2\text{Cl}_2$ . The organic phase was dried over  $\text{Na}_2\text{SO}_4$ , filtered and concentrated in vacuo. The residue was purified by flash chromatography, eluting with Hex/EtOAc (1/1, v/v) containing 0.1% of pyridine, unless otherwise specified. The phosphoramidite was obtained as a mixture of diastereomers as white foam.

### Compound 46

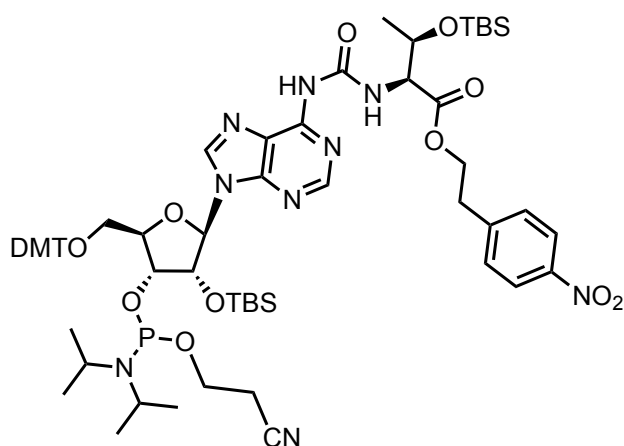

**Yield:** 85%;  **$^{31}\text{P}$  NMR (162 MHz, Acetone- $d_6$ )  $\delta$ :** 150.16, 148.45; **HRMS (ESI):** calculated for  $\text{C}_{65}\text{H}_{91}\text{N}_9\text{O}_{13}\text{PSi}_2^+$ :  $m/z = 1292.6007$   $[\text{M}+\text{H}]^+$ ; found:  $m/z = 1292.6033$   $[\text{M}+\text{H}]^+$ .

### Compound 47

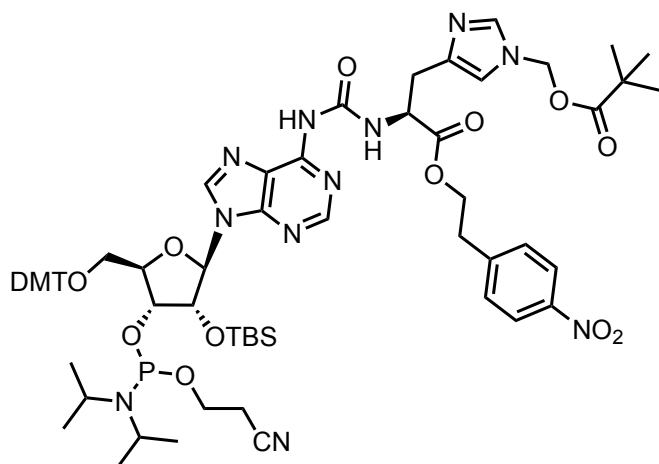

Eluent: 30% CH<sub>2</sub>Cl<sub>2</sub> in EtOAc containing 0.1% of pyridine.

**Yield:** 66%; **<sup>31</sup>P NMR (162 MHz, Acetone-*d*<sub>6</sub>)**  $\delta$ : 150.26, 148.61; **HRMS (ESI):** calculated for C<sub>67</sub>H<sub>87</sub>N<sub>11</sub>O<sub>14</sub>PSi<sup>+</sup>:  $m/z = 1328.5935$  [M+H]<sup>+</sup>; found:  $m/z = 1328.5944$  [M+H]<sup>+</sup>.

### Compound 48

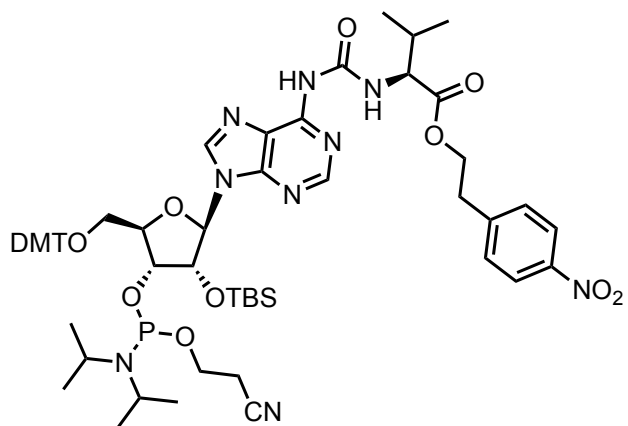

**Yield:** 87%; **<sup>31</sup>P NMR (162 MHz, Acetone-*d*<sub>6</sub>)**  $\delta$ : 150.22, 148.65; **HRMS (ESI):** calculated for C<sub>60</sub>H<sub>79</sub>N<sub>9</sub>O<sub>12</sub>PSi<sup>+</sup>:  $m/z = 1176.5355$  [M+H]<sup>+</sup>; found:  $m/z = 1176.5359$  [M+H]<sup>+</sup>.



### Compound 49

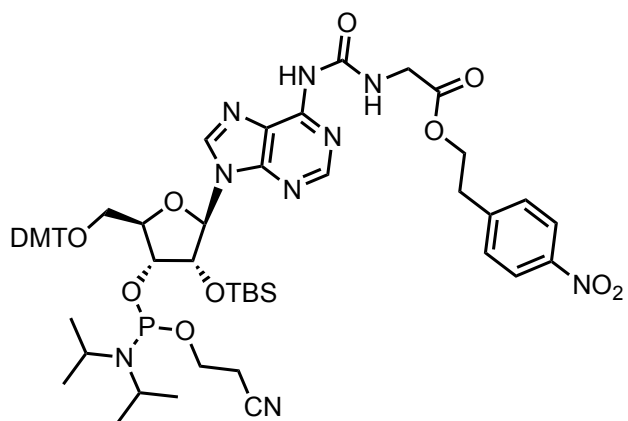

**Yield:** 86%; **<sup>31</sup>P NMR (162 MHz, Acetone-*d*<sub>6</sub>)**  $\delta$ : 150.32, 148.60; **HRMS (ESI):** calculated for C<sub>57</sub>H<sub>72</sub>N<sub>9</sub>O<sub>12</sub>SiP<sup>+</sup>:  $m/z = 1134.4880$  [M+H]<sup>+</sup>; found:  $m/z = 1134.4894$  [M + H]<sup>+</sup>.

### Compound 50

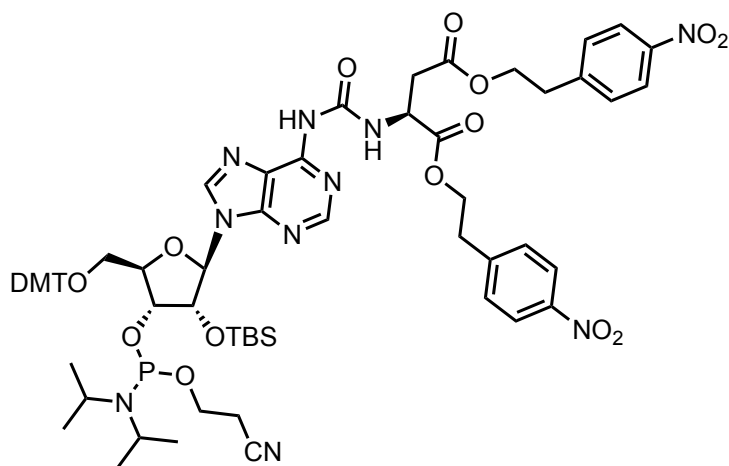

**Yield:** 65%; **<sup>31</sup>P NMR (162 MHz, Acetone-*d*<sub>6</sub>)**  $\delta$ : 150.15, 148.67; **HRMS (ESI):** calculated for C<sub>67</sub>H<sub>82</sub>N<sub>10</sub>O<sub>16</sub>PSi<sup>+</sup>:  $m/z = 1341.5417$  [M+H]<sup>+</sup>; found:  $m/z = 1341.5437$  [M+H]<sup>+</sup>.

### Compound 51a

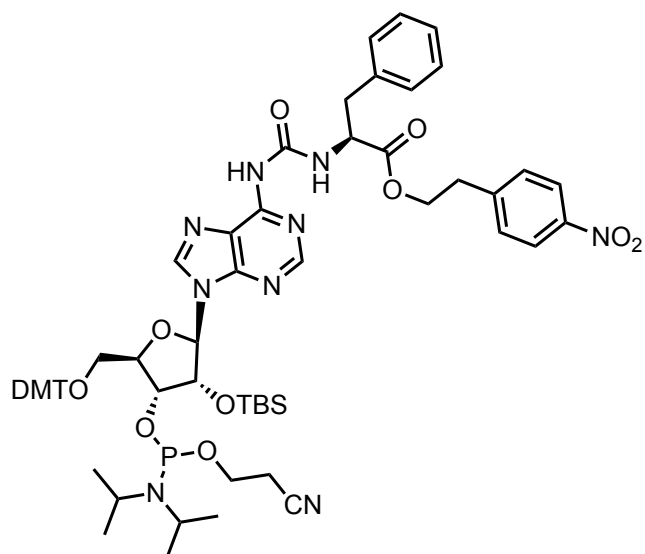

**Yield:** 67%; **<sup>31</sup>P NMR (162 MHz, CD<sub>2</sub>Cl<sub>2</sub>) δ:** 150.7, 149.1; **HRMS (ESI):** calculated for C<sub>64</sub>H<sub>79</sub>N<sub>9</sub>O<sub>12</sub>PSi<sup>+</sup>: m/z = 1224.5350 [M+H]<sup>+</sup>; found: m/z = 1224.5374 [M+H]<sup>+</sup>.

### Compound 51b

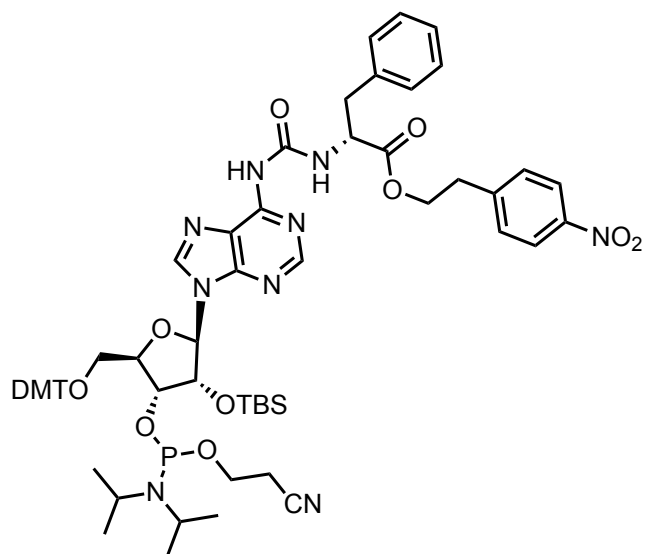

**Yield:** 67%; **<sup>31</sup>P NMR (162 MHz, CD<sub>2</sub>Cl<sub>2</sub>) δ:** 150.6, 148.9; **HRMS (ESI):** calculated for C<sub>64</sub>H<sub>79</sub>N<sub>9</sub>O<sub>12</sub>PSi<sup>+</sup>: m/z = 1224.5350 [M+H]<sup>+</sup>; found: m/z = 1224.5383 [M+H]<sup>+</sup>.

## Compound 52

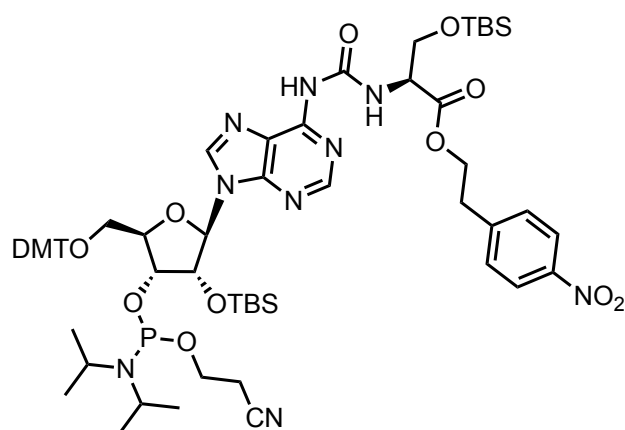

**Yield:** 70%;  $^{31}\text{P}$  NMR (162 MHz, Acetone- $d_6$ )  $\delta$ : 150.34, 148.45; **HRMS (ESI):** calculated for  $\text{C}_{64}\text{H}_{89}\text{N}_9\text{O}_{13}\text{PSi}_2^+$ :  $m/z = 1278.5856$   $[\text{M}+\text{H}]^+$ ; found:  $m/z = 1278.5877$   $[\text{M}+\text{H}]^+$ .

## 2.2. Synthesis of DNA building block

### Compound 54

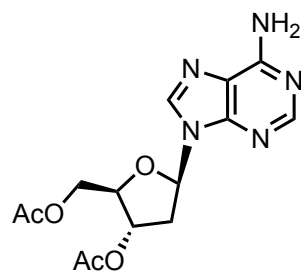

The compound was synthesized according to the published procedure.<sup>5</sup>

Acetic anhydride (1.1 ml, 11.5 mmol, 6.2 eq.) was added to a mixture of deoxyadenosine monohydrate **53** (0.5 g, 1.85 mmol, 1 eq.), pyridine (7 ml) and 4-(dimethylamino)pyridine (25 mg, 0.4 mmol, 0.1 eq.). The reaction mixture was stirred at room temperature for 4 hours. Subsequently, iced water was added, and the mixture was concentrated and co-evaporated with toluene. The compound was used for further steps without additional purification.

**Yield:** 99%;  $^1\text{H}$  NMR (400 MHz,  $\text{CDCl}_3$ )  $\delta$ : 8.23 (s, 1H), 7.92 (s, 1H), 7.26 (s, 2H), 6.34 (dd,  $J = 7.9, 6.0$  Hz, 1H), 5.34 – 5.32 (m, 1H), 4.32 – 4.24 (m, 3H), 2.87 – 2.80 (m, 1H), 2.57 – 2.52 (m, 1H), 2.04 (s, 3H), 2.00 (s, 3H). **HRMS (ESI):** calculated for  $\text{C}_{14}\text{H}_{18}\text{N}_5\text{O}_5^+$ :  $m/z = 336.1302$   $[\text{M}+\text{H}]^+$ ; found:  $m/z = 336.1305$   $[\text{M}+\text{H}]^+$ .

The analytical data is in agreement with the literature.<sup>5</sup>

## Compound 55

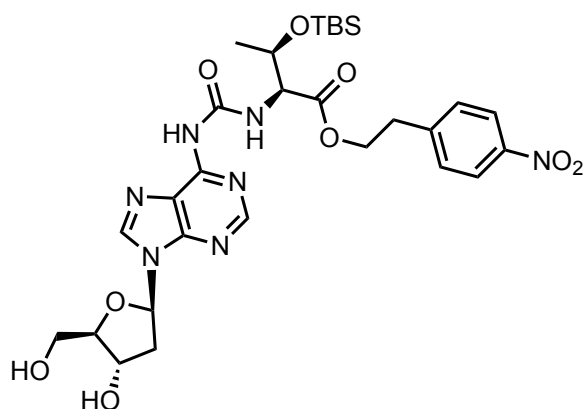

The acetyl-protected deoxyadenosine derivative **54** (0.5 g, 1.5 mmol, 1 eq.) was dissolved in dry  $\text{CH}_2\text{Cl}_2$  under nitrogen atmosphere. 1-*N*-methyl-3-phenoxy carbonyl-imidazolium chloride (**22**; 0.71 g, 3 mmol, 2 eq.) was added to the reaction mixture and the resulting suspension was stirred at room temperature for 2 hours (the solution in time becomes clear). Afterwards the protected threonine derivative **7** (1.1 g, 3 mmol, 2 eq.) was added together with TEA (415  $\mu\text{l}$ , 3 mmol, 2 eq.) as a solution in  $\text{CH}_2\text{Cl}_2$  and the resulting solution was stirred overnight at room temperature. The reaction was quenched by addition of saturated aqueous  $\text{NaHCO}_3$  solution. The solution was extracted three times with  $\text{CH}_2\text{Cl}_2$ , and the organic phase was dried, filtered and concentrated *in vacuo*. The acetyl groups were immediately deprotected with 7N  $\text{NH}_3/\text{MeOH}$  (2 ml). After stirring 2 hours at room temperature, the reaction mixture was evaporated. The residue was purified via flash chromatography eluting with  $\text{CH}_2\text{Cl}_2/\text{MeOH}$  (10/1, v/v).

**Yield:** 65%; **IR:**  $\tilde{\nu}$  = 3227 (w), 2929 (w), 2855 (w), 1734 (w), 1686 (vs), 1610 (s), 1587 (s), 1518 (vs), 1465 (vs), 1344 (vs), 1312 (w), 1248 (s), 1213 (w), 1094 (vs), 939 (s), 827 (vs)  $\text{cm}^{-1}$ ;  **$^1\text{H}$  NMR (400 MHz, Acetone- $d_6$ )  $\delta$ :** 10.02 (d,  $J$  = 8.6 Hz, 1H), 9.40 (s, 1H), 8.70 (s, 1H), 8.39 (s, 1H), 7.91 (d,  $J$  = 8.2 Hz, 2H), 7.47 (d,  $J$  = 8.2 Hz, 2H), 6.54 (t,  $J$  = 6.7 Hz, 1H), 4.67 (s, 1H), 4.51 (d,  $J$  = 9.3 Hz, 2H), 4.38 (t,  $J$  = 5.6 Hz, 2H), 4.09 (s, 1H), 3.86 – 3.67 (m, 2H), 3.08 (t,  $J$  = 5.6 Hz, 2H), 2.90 (dt,  $J$  = 13.0, 6.7 Hz, 1H), 2.52 – 2.41 (m, 1H), 2.01 (s, 1H), 1.93 (s, 1H), 1.23 (d,  $J$  = 5.9 Hz, 3H), 0.88 (s, 9H), 0.05 (s, 3H), -0.06 (s, 3H);  **$^{13}\text{C}$  NMR (101 MHz, Acetone- $d_6$ )  $\delta$ :** 171.5, 155.1, 151.1, 150.9, 147.4, 144.2, 130.9, 124.0, 122.0, 89.8, 86.8, 72.6, 69.5, 65.5, 63.3, 41.4, 35.2, 30.6, 26.0, 21.5, 20.5, 18.4, -4.2, -5.2; **HRMS (ESI):** calculated for  $\text{C}_{29}\text{H}_{42}\text{N}_7\text{O}_9\text{Si}^+$ :  $m/z$  = 660.2813  $[\text{M}+\text{H}]^+$ ; found:  $m/z$  = 660.2812  $[\text{M}+\text{H}]^+$ .

## Compound 56

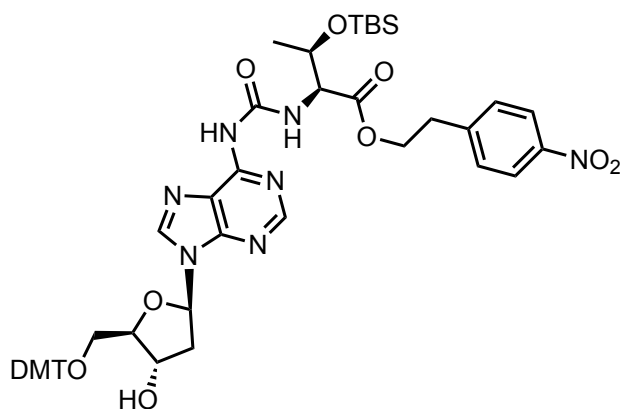

The 3'-5'-deprotected adenosine derivative **55** (0.34 g, 0.52 mmol, 1 eq.) was dissolved in pyridine under N<sub>2</sub> atmosphere. DMT chloride (0.26 g, 0.77 mmol, 1.5 eq.) was added in two portions and the mixture was stirred at room temperature overnight. Then the volatiles were evaporated, and crude product was purified by flash chromatography eluting with CH<sub>2</sub>Cl<sub>2</sub>/MeOH (10/1, v/v) with an addition of 0.1% of pyridine to afford the DMT protected derivative.

**Yield:** 72%; **IR:**  $\tilde{\nu}$  = 2960 (w), 2930 (w), 1734 (w), 1696 (s), 1609 (s), 1586 (w), 1520 (vs), 1509 (vs), 1467 (s), 1345 (vs), 1304 (w), 1250 (vs), 1175 (s), 1095 (w), 1034 (s), 940 (w), 828 (vs), 777 (s), 699 (w) cm<sup>-1</sup>; **<sup>1</sup>H NMR (400 MHz, Acetone-*d*<sub>6</sub>)**  $\delta$ : 10.02 (d, *J* = 9.1 Hz, 1H), 8.98 (s, 1H), 8.52 (s, 1H), 8.34 (s, 1H), 7.96 (d, *J* = 8.7 Hz, 2H), 7.51 (d, *J* = 8.7 Hz, 2H), 7.42 (d, *J* = 7.1 Hz, 2H), 7.31 – 7.28 (m, 4H), 7.24 – 7.12 (m, 3H), 6.79 – 6.74 (m, 4H), 6.55 (t, *J* = 6.4 Hz, 1H), 4.76 (q, *J* = 4.2 Hz, 1H), 4.64 – 4.58 (m, 1H), 4.55 (ddd, *J* = 10.6, 7.7, 1.5 Hz, 2H), 4.41 (t, *J* = 6.2 Hz, 2H), 4.25 – 4.18 (m, 1H), 3.74 (d, *J* = 3.3 Hz, 6H), 3.43 (dd, *J* = 10.2, 5.9 Hz, 1H), 3.35 (dd, *J* = 10.2, 4.0 Hz, 1H), 3.17 – 3.10 (m, 3H), 2.58 – 2.52 (m, 1H), 1.29 (d, *J* = 6.3 Hz, 3H), 0.93 (s, 9H), 0.11 (s, 3H), -0.01 (s, 3H); **<sup>13</sup>C NMR (101 MHz, Acetone-*d*<sub>6</sub>)**  $\delta$ : 171.6, 159.4, 154.9, 151.2, 151.0, 147.4, 146.1, 143.9, 136.8, 131.0, 130.9, 130.8, 128.9, 128.4, 127.4, 124.0, 122.0, 113.7, 87.7, 86.8, 86.1, 72.6, 69.6, 65.4, 65.1, 60.3, 55.4, 40.0, 35.3, 26.0, 21.5, 18.4, -4.1, -5.2; **HRMS (ESI):** calculated for C<sub>50</sub>H<sub>60</sub>N<sub>7</sub>O<sub>11</sub>Si<sup>+</sup>: *m/z* = 962.4120 [M+H]<sup>+</sup>; found: *m/z* = 962.4136 [M+H]<sup>+</sup>.

## Compound 57

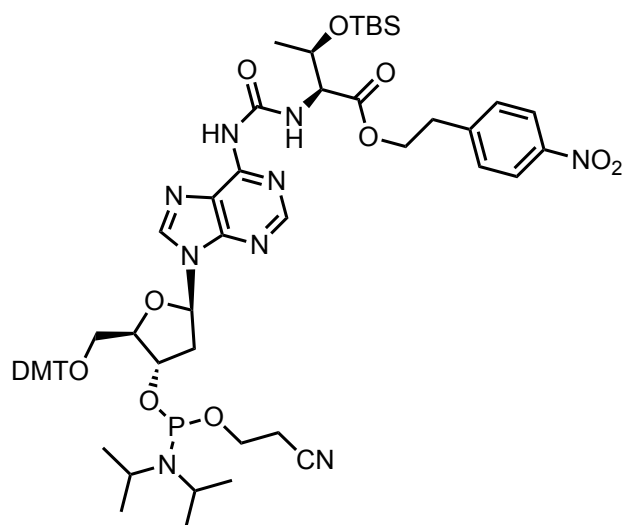

In an oven-dried flask under argon atmosphere, 5'-DMT protected compound **56** (0.1 g, 0.1 mmol, 1 eq.) was dissolved in  $\text{CH}_2\text{Cl}_2$  and cooled to 0 °C. Hünig's base (72  $\mu\text{l}$ , 0.4 mmol, 4 eq.) was added dropwise followed by the addition of 2-cyanoethyl *N,N*-diisopropylchlorophosphoramidite (60  $\mu\text{l}$ , 0.25 mmol, 2.5 eq.). The solution was stirred at room temperature for 2 h. The reaction was quenched by addition of sat.  $\text{NaHCO}_3$  solution, and then extracted three times with  $\text{CH}_2\text{Cl}_2$ . The organic phase was dried over  $\text{Na}_2\text{SO}_4$ , filtered and concentrated in vacuo. The residue was purified by flash chromatography, eluting with Hex/EtOAc (1/2, v/v) containing 0.1% of pyridine. The phosphoramidite was obtained as a mixture of diastereomers as white foam.

**Yield:** 62%;  **$^{31}\text{P}$  NMR (162 MHz, Acetone- $d_6$ )  $\delta$ :** 148.00, 146.59; **HRMS (ESI):** calculated for  $\text{C}_{59}\text{H}_{76}\text{N}_9\text{NaO}_{12}\text{PSi}^+$ :  $m/z = 1184.5018$   $[\text{M}+\text{Na}]^+$ ; found:  $m/z = 1184.5021$   $[\text{M}+\text{Na}]^+$ .

### 3. Synthesis and Purification of Oligonucleotides

All of the oligonucleotides used in this study were synthesized on a 1  $\mu\text{mol}$  scale using a DNA automated synthesizer (Applied Biosystems 394 DNA/RNA Synthesizer) with standard phosphoramidite chemistry. The phosphoramidites of canonical ribonucleosides were purchased from Glen Research and Sigma-Aldrich. Oligonucleotides containing non-canonical nucleosides were synthesized in DMT-OFF mode using phosphoramidites (Bz-A, Dmf-G, Ac-C, U) with BTT in  $\text{CH}_3\text{CN}$  as an activator, DCA in  $\text{CH}_2\text{Cl}_2$  as a deblocking solution and  $\text{Ac}_2\text{O}$  in pyridine/THF as a capping reagent. For deprotection of npe-group the solid support was treated with DBU solution (10% in THF, 1 ml) for 2 h at room temperature. Subsequently, the supernatant was removed, and the beads were washed with THF and dried under vacuum. The solid support was suspended in a mixture of aqueous ammonia and methylamine (1:1, 1 ml) at room temperature for 1 h. The supernatant was removed, and the beads were washed with water. The supernatant and washings were combined, and the solvents were evaporated under reduced pressure. The residue was subsequently heated with a solution of triethylamine trihydrofluoride (125  $\mu\text{l}$ ) in DMSO (50  $\mu\text{l}$ ) at 65  $^\circ\text{C}$  for 1.5 h. The RNA was precipitated by addition of aqueous NaOAc solution (3M, 25  $\mu\text{l}$ ) and *n*-butanol (1 ml). To ensure complete precipitation, the sample was incubated at -80  $^\circ\text{C}$  for 1 h. After centrifugation (4  $^\circ\text{C}$ , 4000 rpm, 15 min), the supernatant was removed, and the precipitated RNA was lyophilized. The oligonucleotides were further purified by reverse-phase HPLC using a Waters Breeze (2487 Dual  $\lambda$  Array Detector, 1525 Binary HPLC Pump) equipped with the column VP 250/32 C18 from Macherey Nagel. Oligonucleotides were purified using the following buffer system: buffer A: 100 mM  $\text{NEt}_3/\text{HOAc}$ , pH 7.0 in  $\text{H}_2\text{O}$  and buffer B: 100 mM  $\text{NEt}_3/\text{HOAc}$  in 80 % (v/v) acetonitrile. A flow rate of 5 ml/min with a gradient of 0-25 % of buffer B in 30 min was applied for the purifications. Analytical RP-HPLC was performed on an analytical HPLC Waters Alliance (2695 Separation Module, 2996 Photodiode Array Detector) equipped with the column Nucleosil 120-2 C18 from Macherey Nagel using a flow of 0.5 mL/min, a gradient of 0-30% of buffer B in 45 min was applied. Calculation of concentrations was assisted using the software OligoAnalyzer 3.0 (Integrated DNA Technologies: <https://eu.idtdna.com/calc/analyzer>). For strands containing non-canonical base, the extinction coefficient of their corresponding canonical-only strand was employed without corrections. The structural integrity of the synthesized oligonucleotides was analyzed by MALDI-TOF mass measurements.

Sequences of synthesized strands:

**ON1:** 5' GUCt<sup>6</sup>ACCUGA 3'

**ON2:** 5' GUCg<sup>6</sup>ACCUGA 3'

**ON3:** 5' GUCval<sup>6</sup>ACCUGA 3'

**ON4:** 5' GUChis<sup>6</sup>ACCUGA 3'

**ON5:** 5' GUCasp<sup>6</sup>ACCUGA 3'

**ON6:** 5' GUC-L-phe<sup>6</sup>ACCUGA 3'

**ON7:** 5' GUC-D-phe<sup>6</sup>ACCUGA 3'

**ON8:** 5' AUCGt<sup>6</sup>ACUACGt<sup>6</sup>AAUCGct<sup>6</sup>AACCG 3'

**ON9:** 5' AGAUGUG-ser<sup>6</sup>A-asp<sup>6</sup>A-his<sup>6</sup>A-GAGAUGA 3'

**ODN1:** 5' d(GTCt<sup>6</sup>dACCTGA) 3'



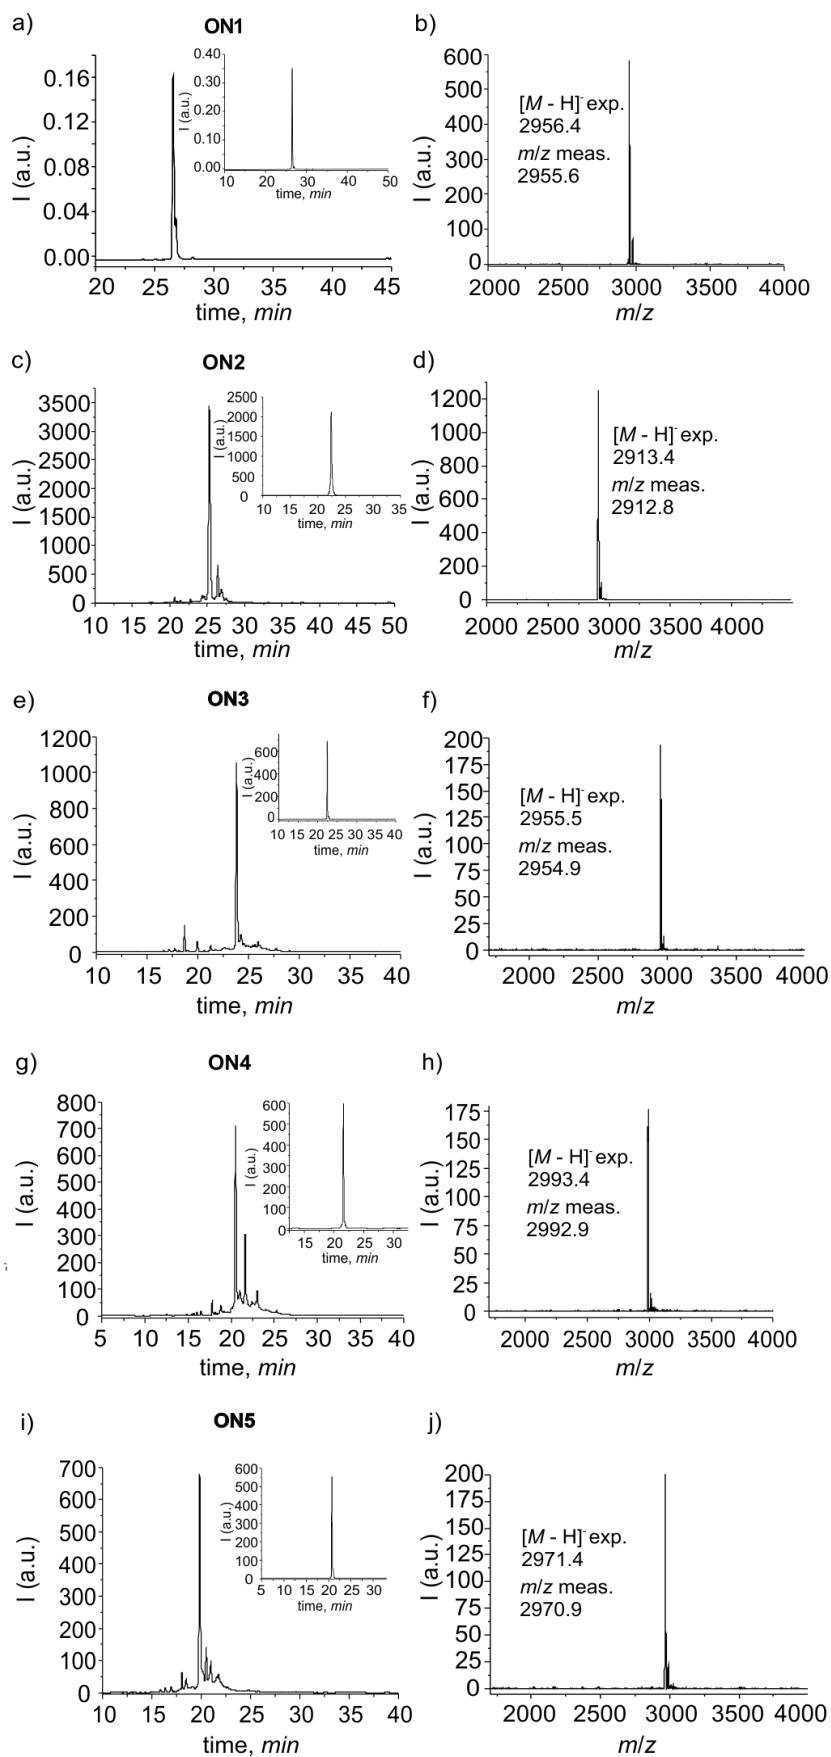

**Figure S1.** HPLC and MALDI data of oligonucleotides **ON1-ON5**.

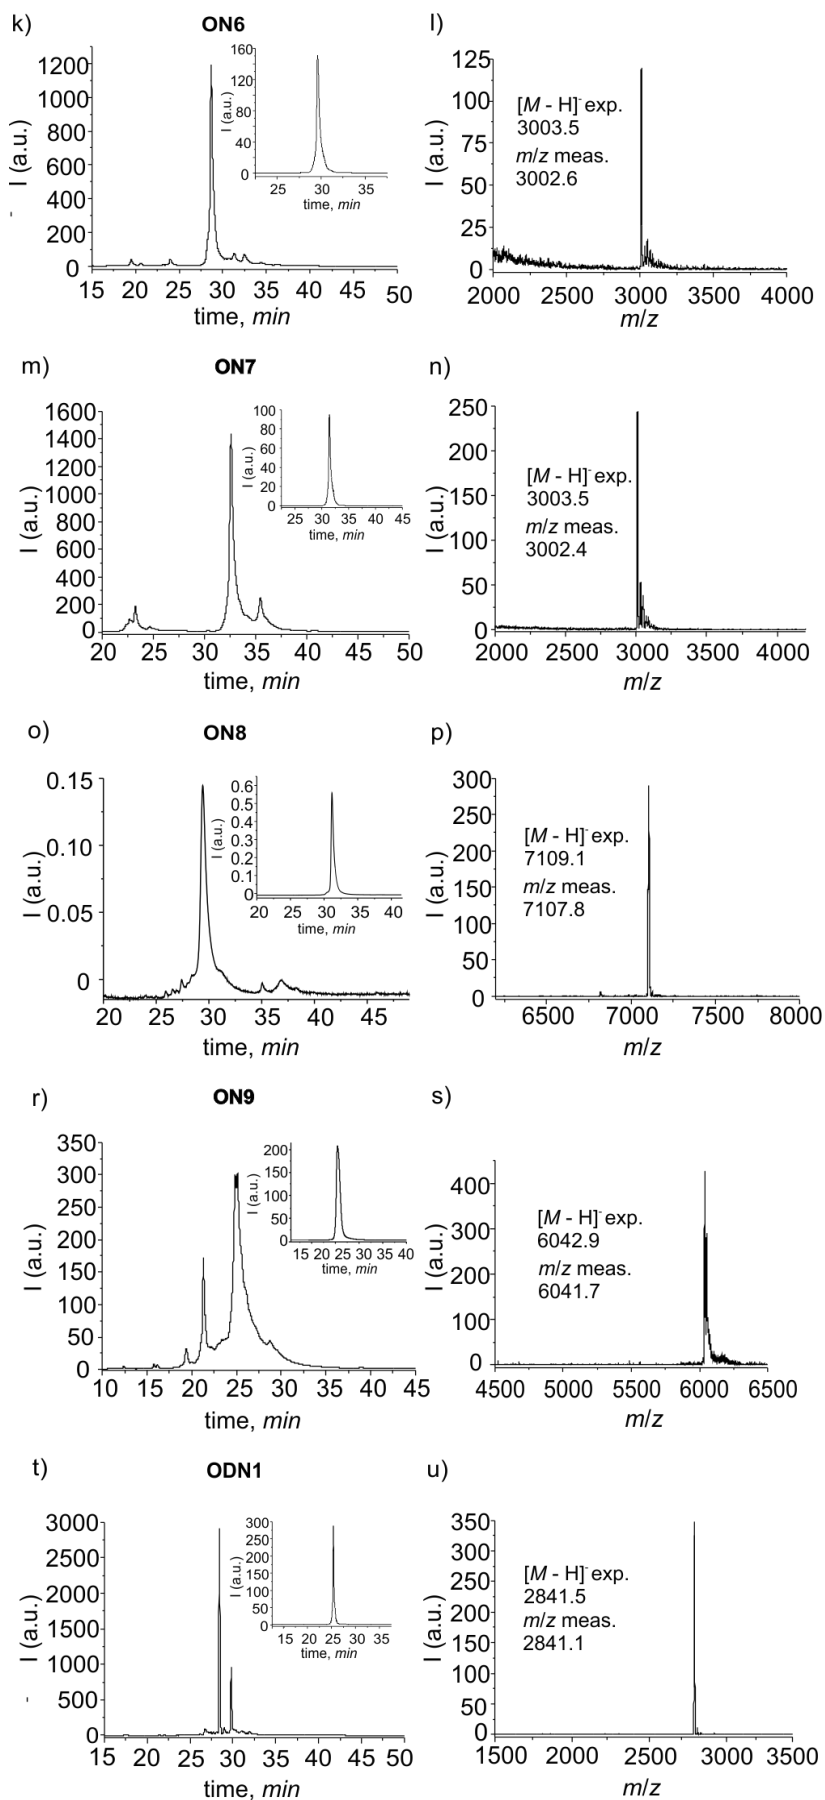

**Figure S2.** HPLC and MALDI data of oligonucleotides **ON6-ODN1**.

#### **4. UV Melting Curve Measurements**

The UV melting curves were measured on JASCO V-650 spectrometer using 10 mm QS cuvettes, purchased from Hellma Analytics. A solution (80  $\mu\text{L}$ ) of equimolar amounts of oligonucleotides (4  $\mu\text{M}$  each) in the buffer solution containing 10 mM sodium phosphate buffer (pH 7.0) and 150 mM NaCl was heated at 90  $^{\circ}\text{C}$  for 2 min and gradually cooled to 4  $^{\circ}\text{C}$  prior to the measurement. Melting profiles were recorded at temperatures between 5 and 75  $^{\circ}\text{C}$  with a ramping and scanning rate of 1  $^{\circ}\text{C}/\text{min}$  at 260 nm. All samples were measured at least three times.  $T_m$  values from each measurement were calculated using the “fitting curve” method and presented as an average of three independent measurements.

# 5. NMR spectra

Compound 5

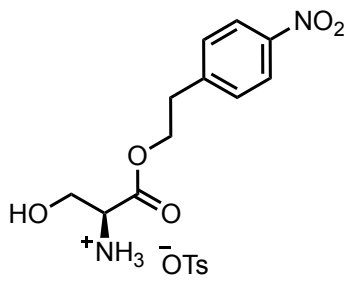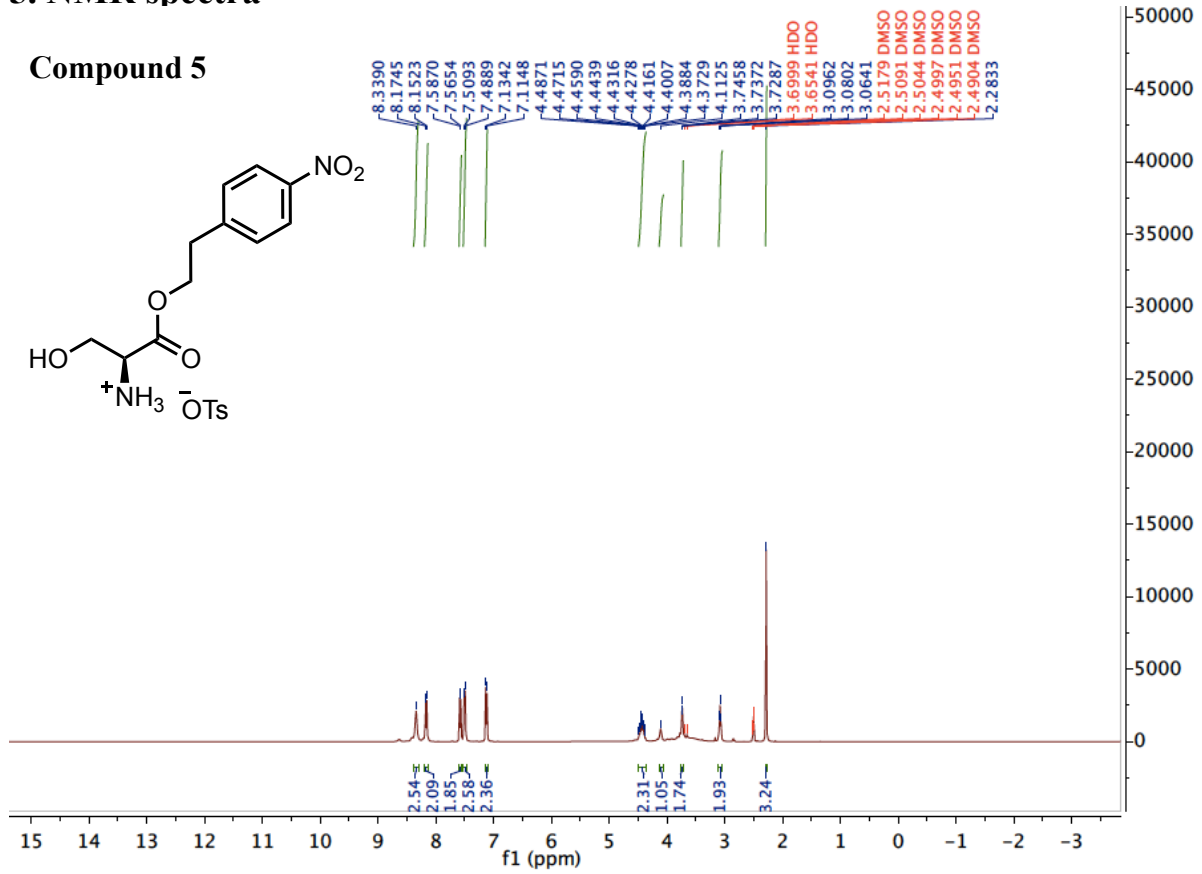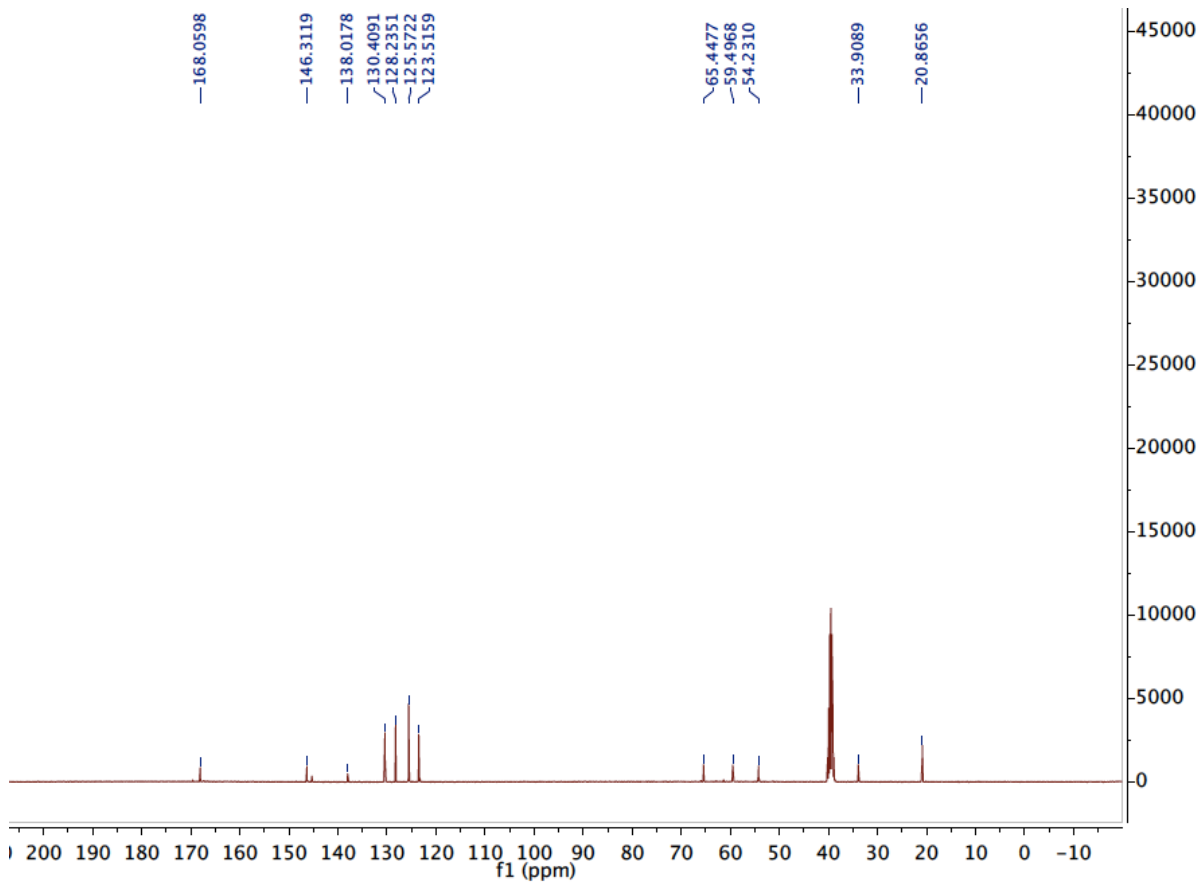

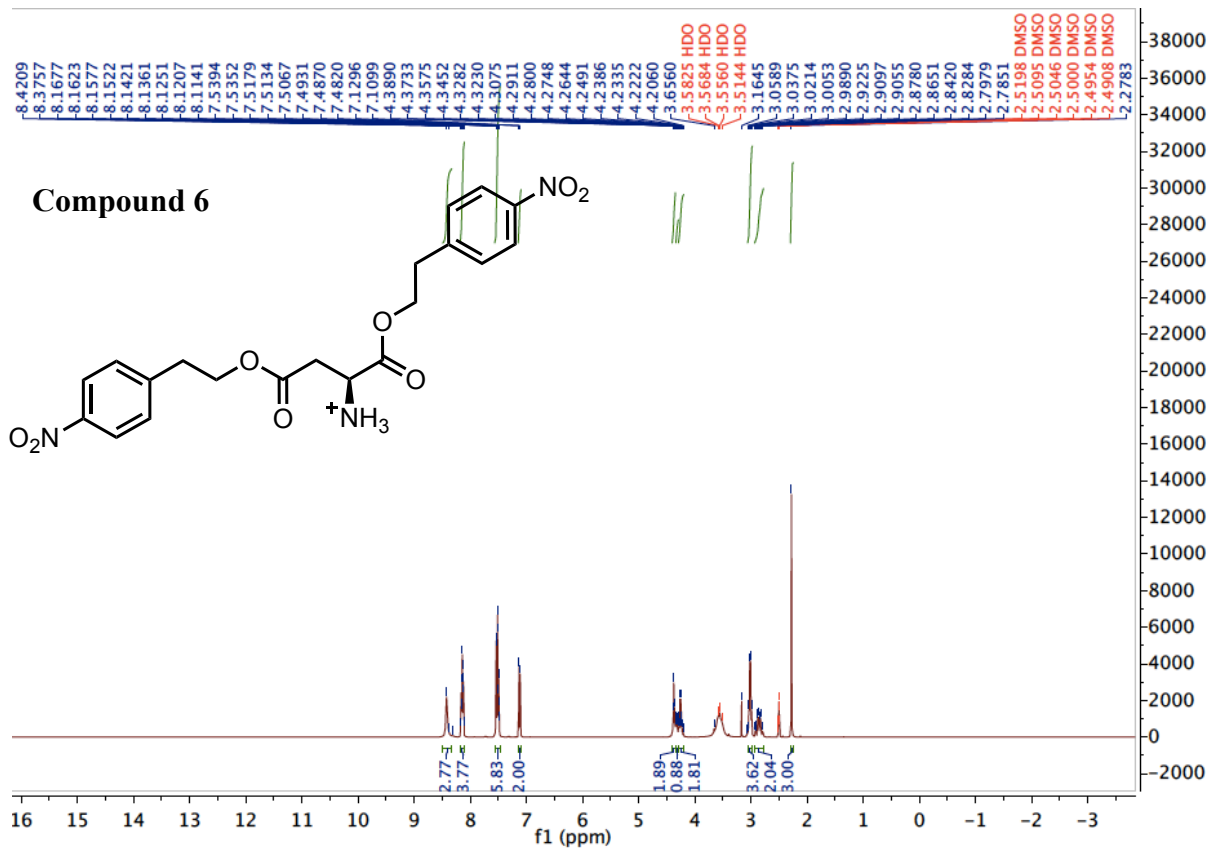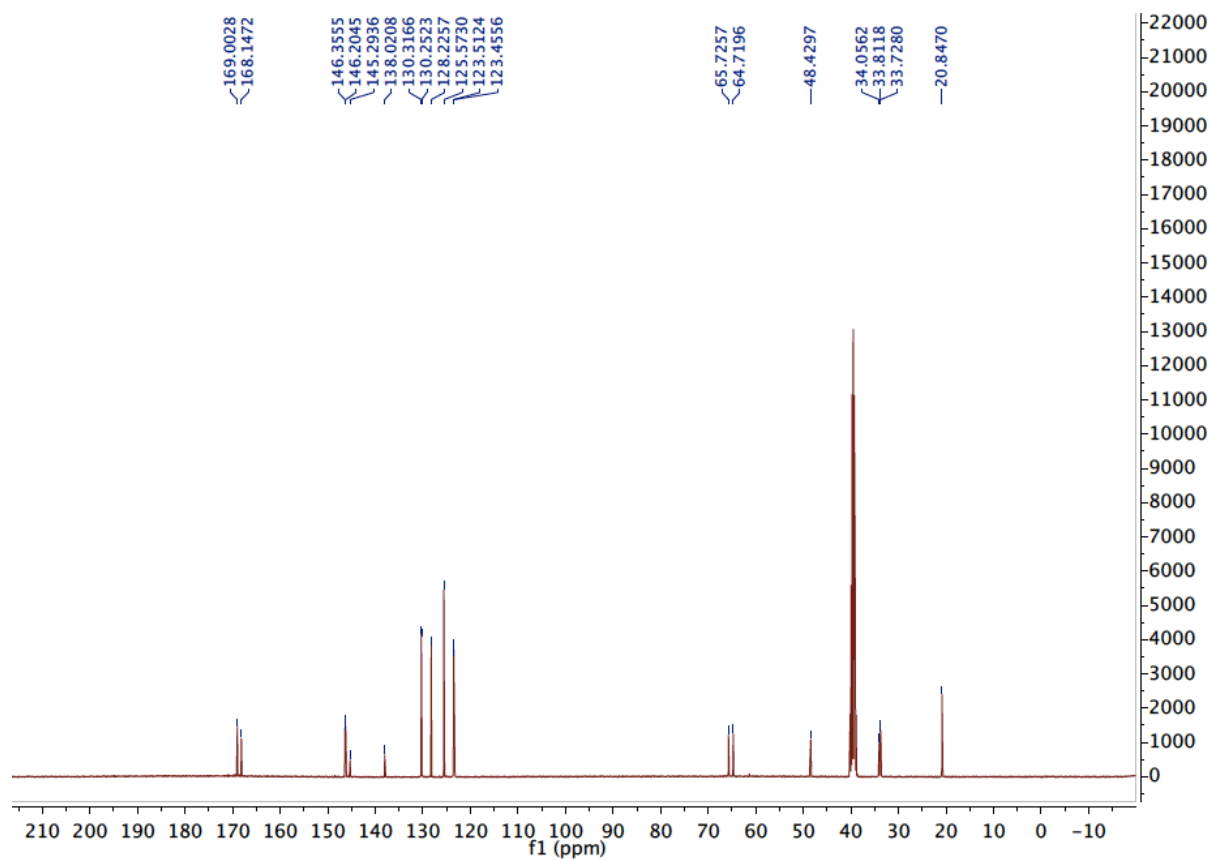

**Compound 8**

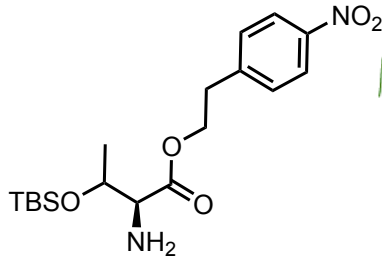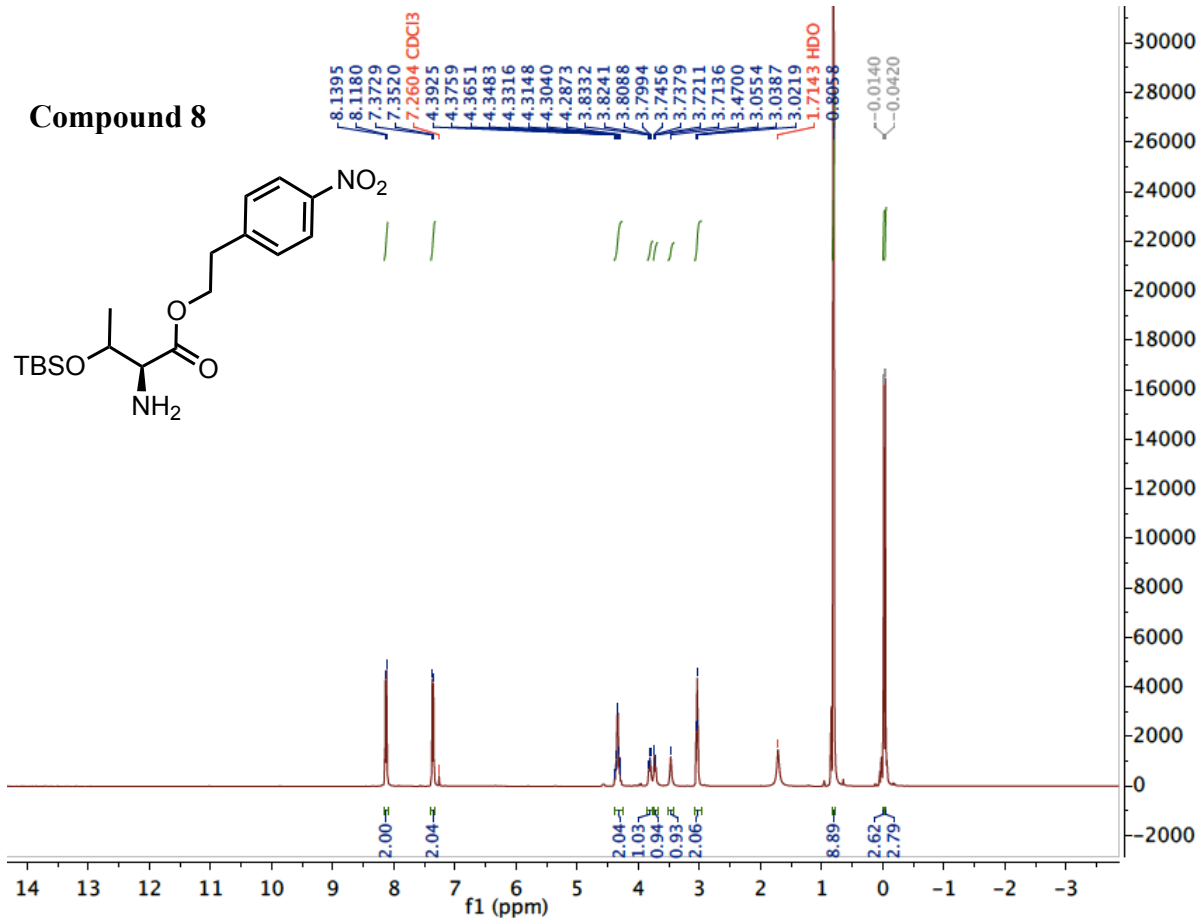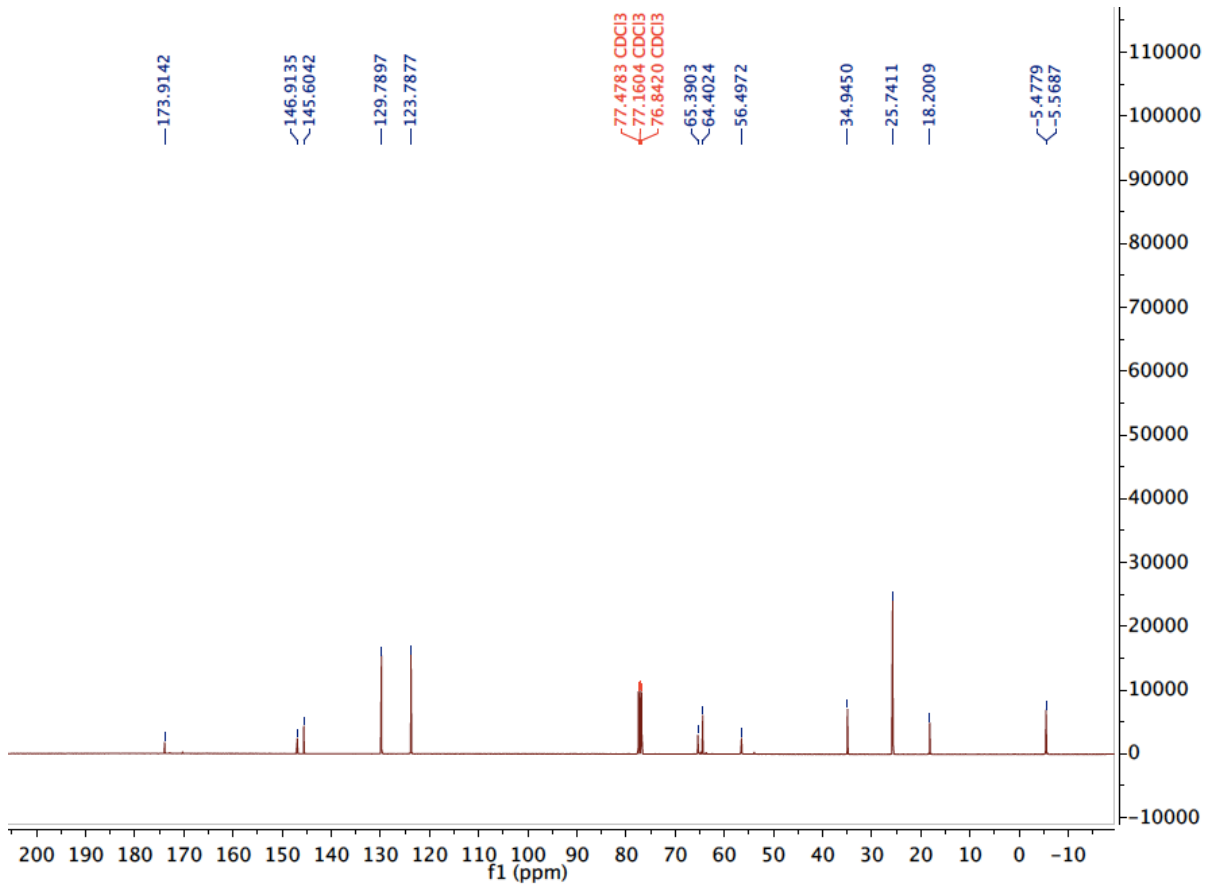

**Compound 12**

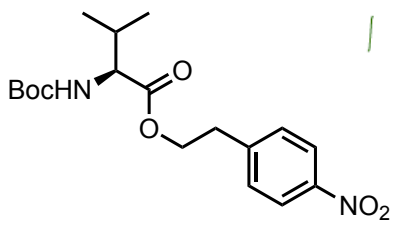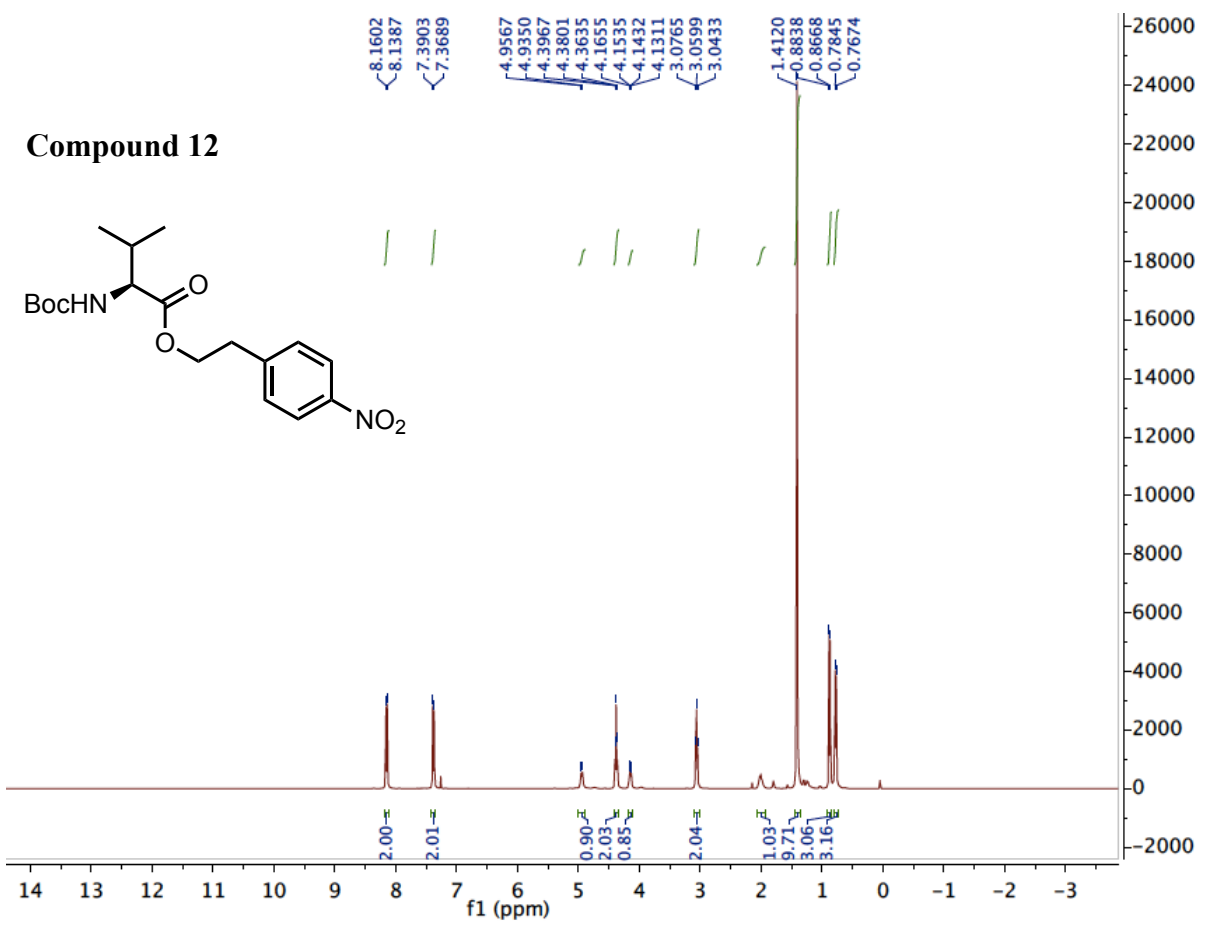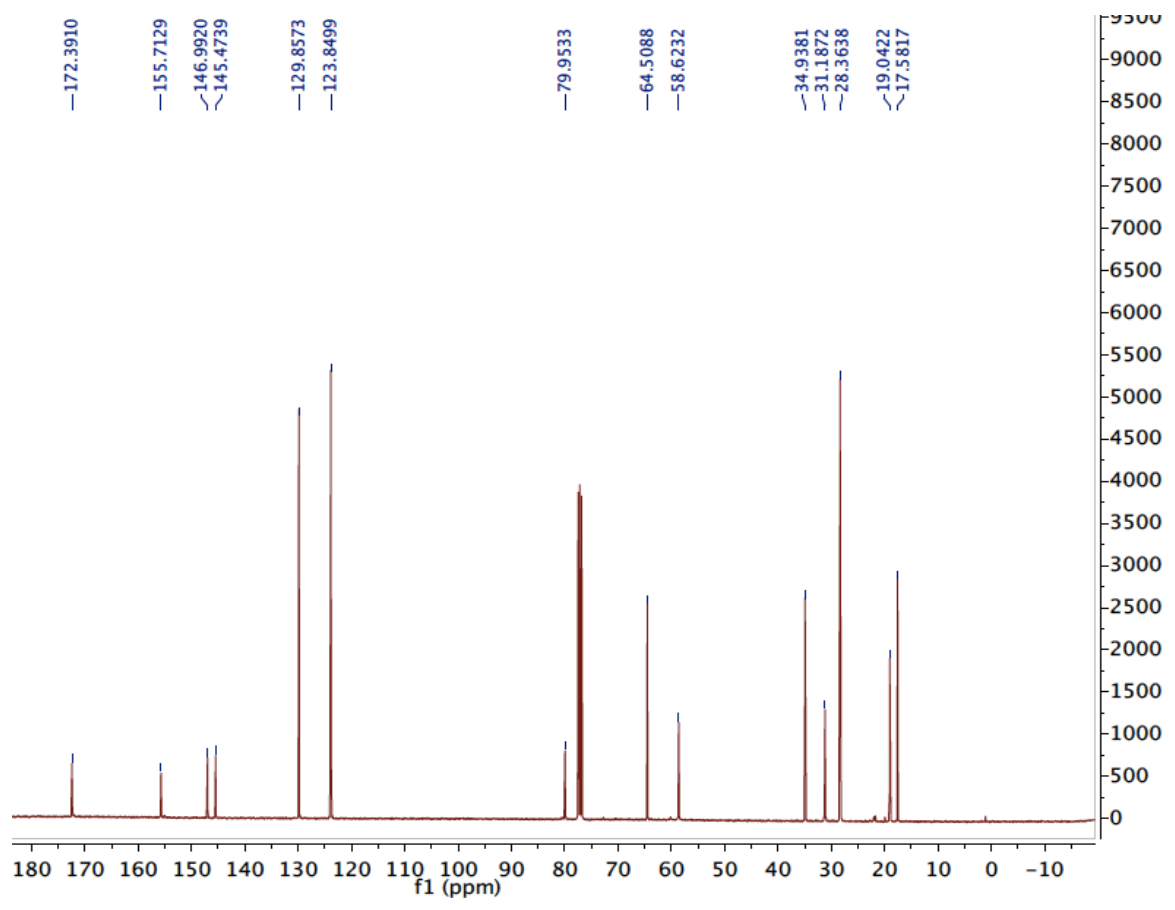

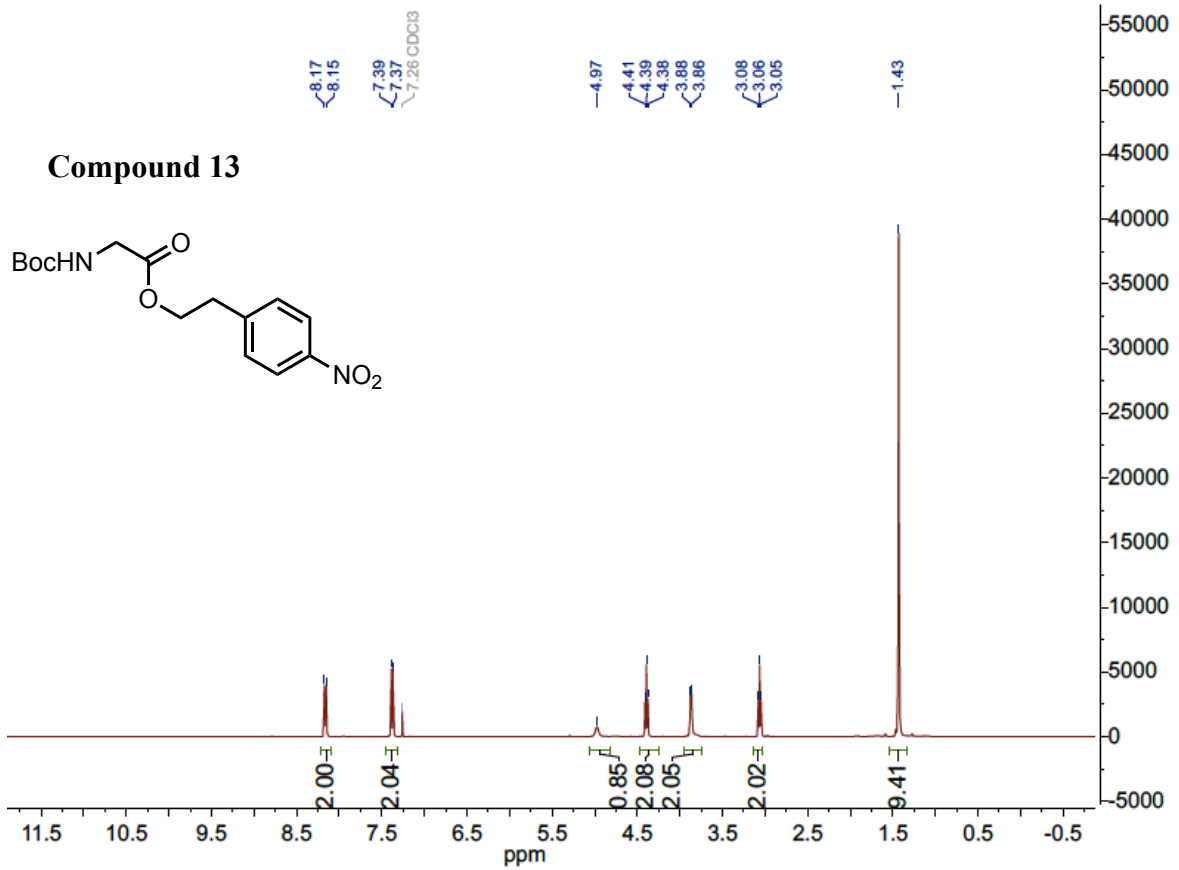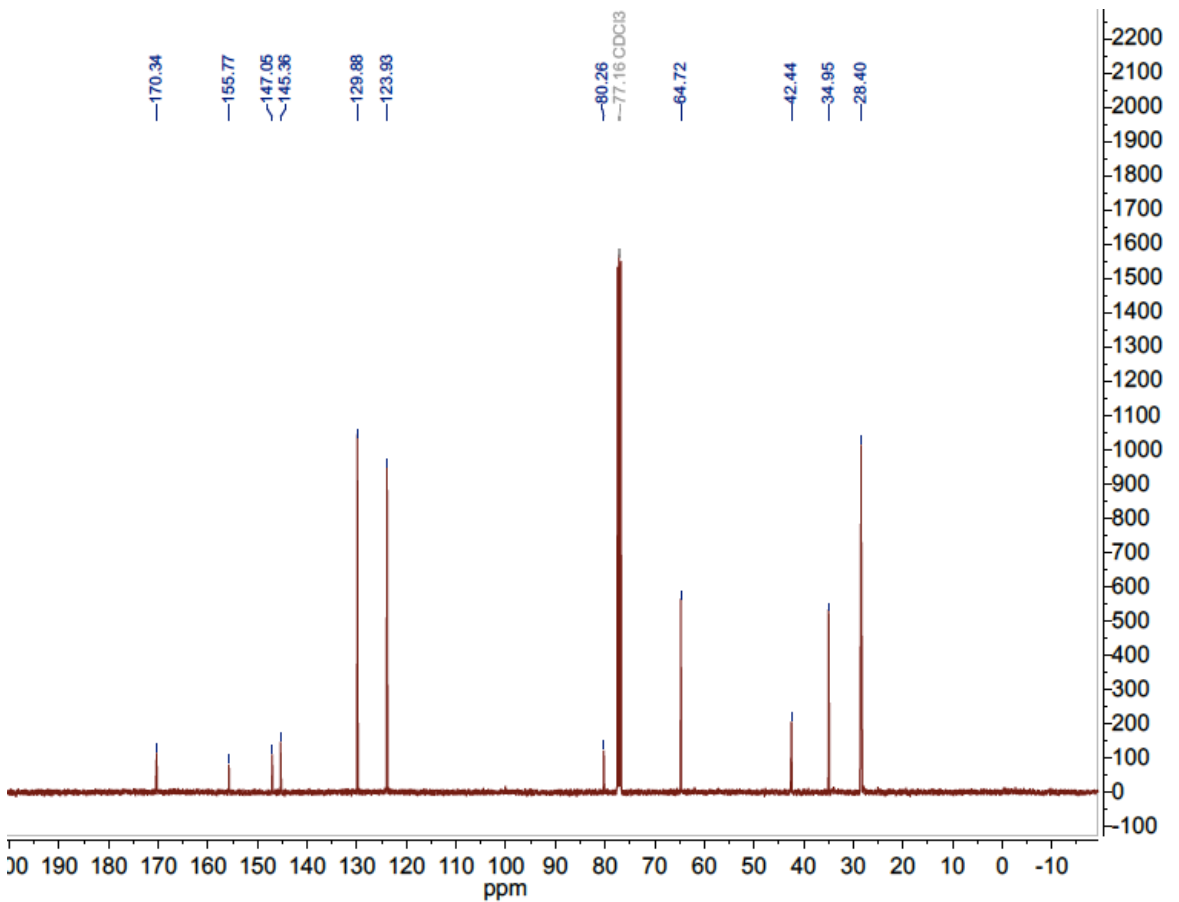



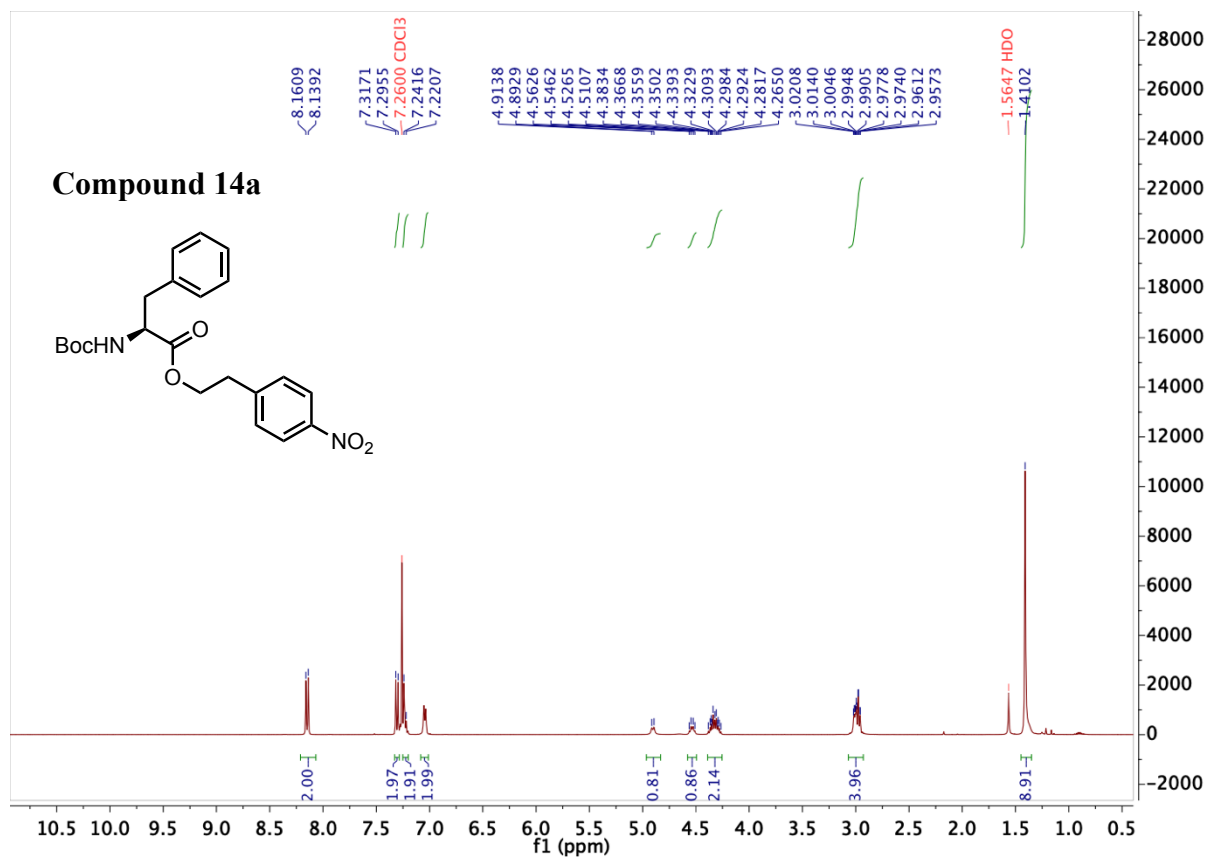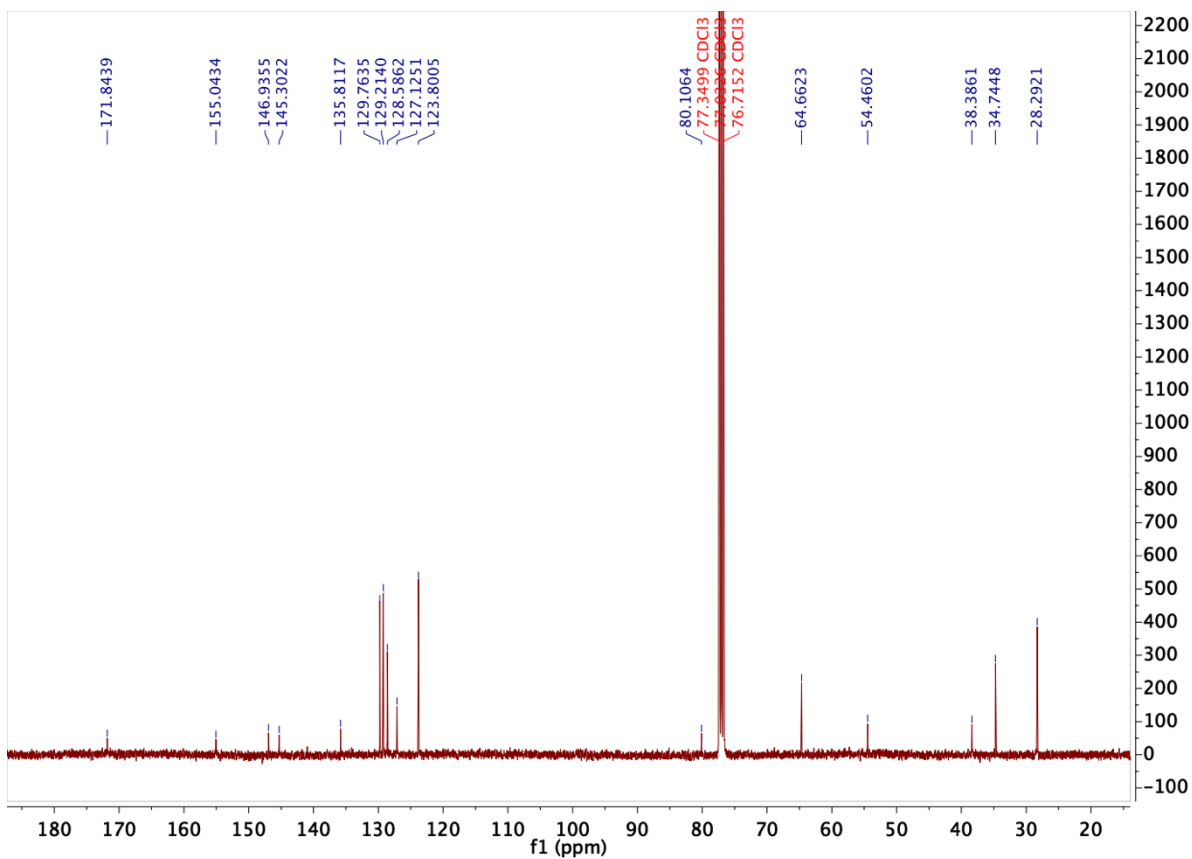

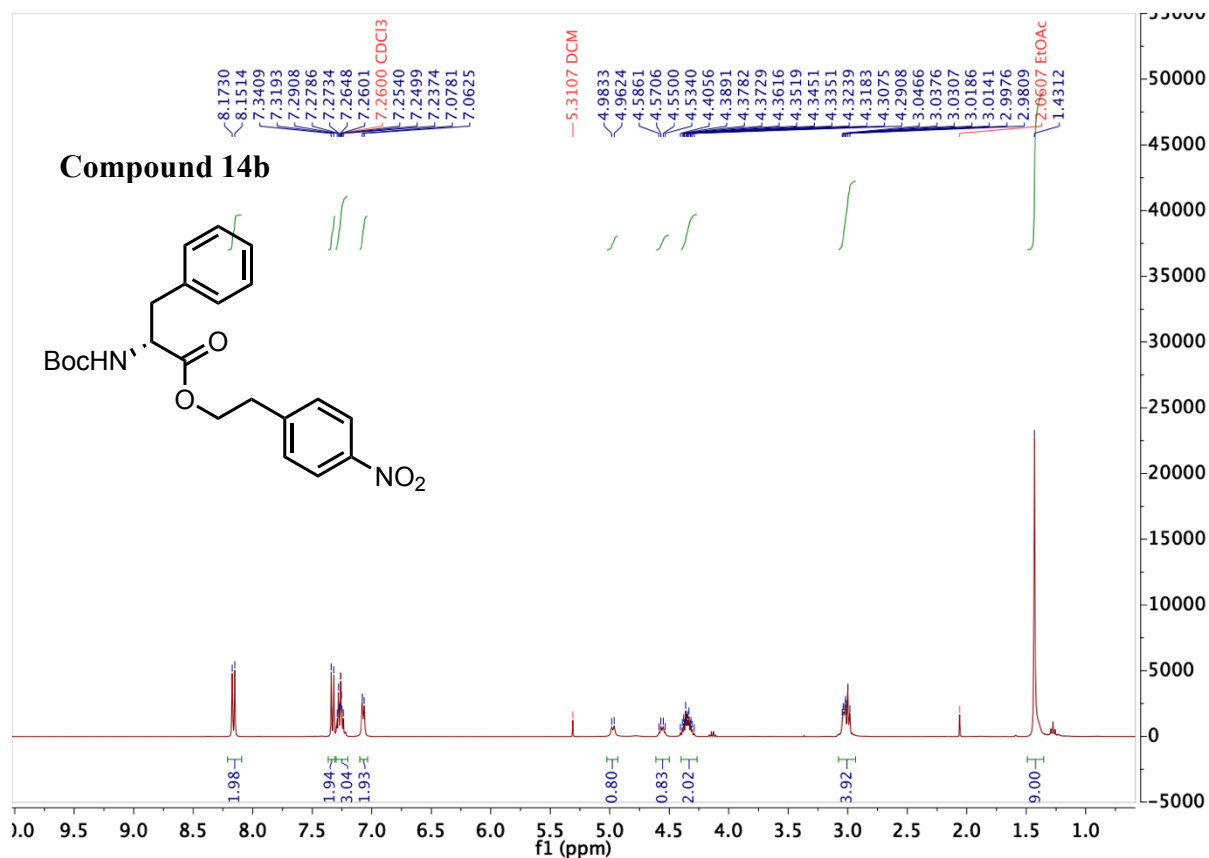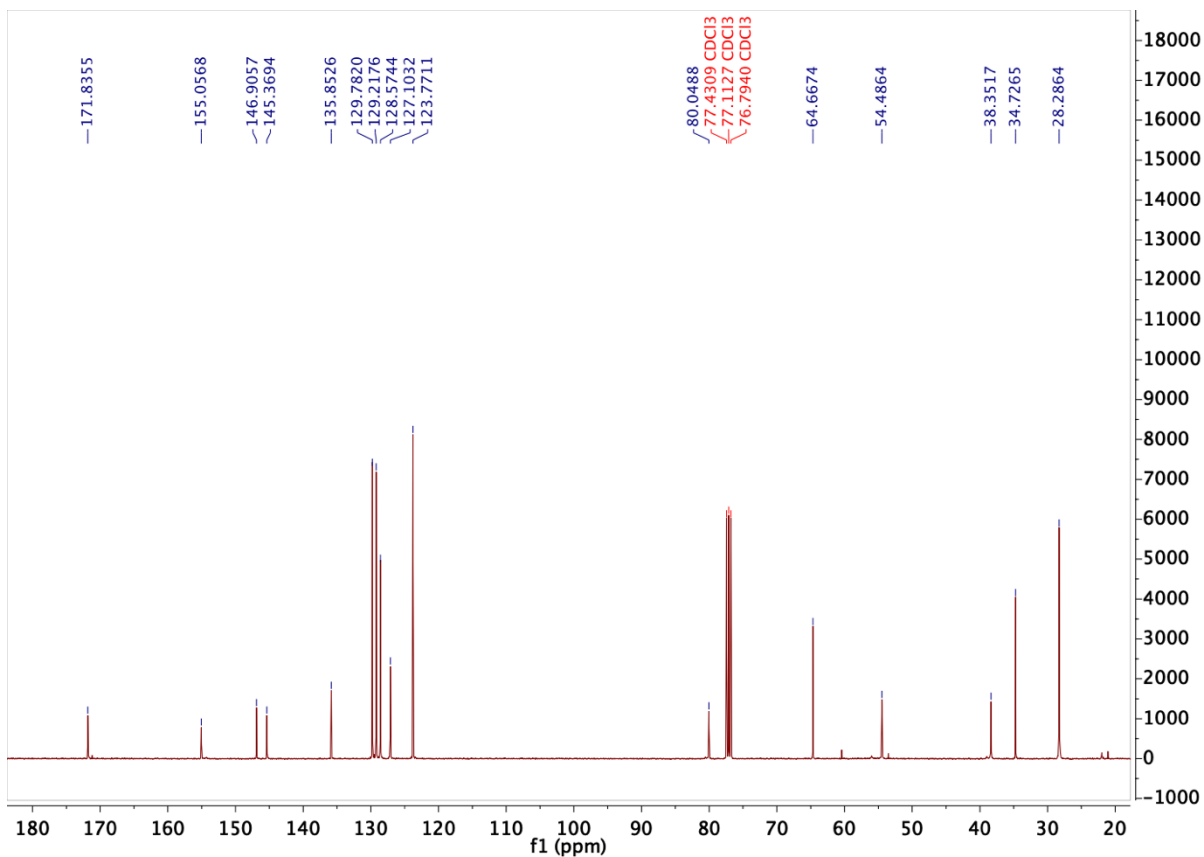

N074\_dmso\_fch1.fid

### Compound 15

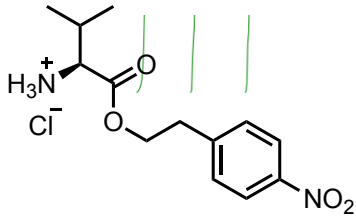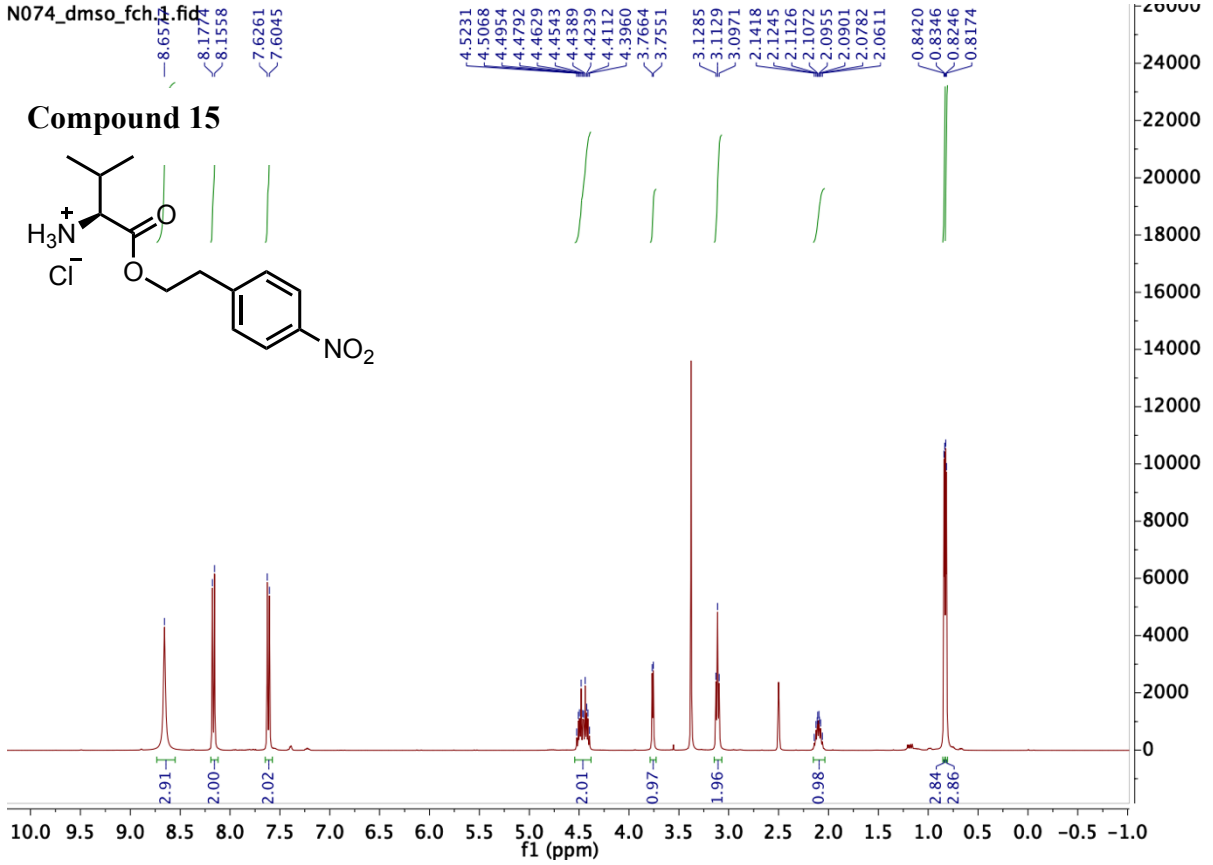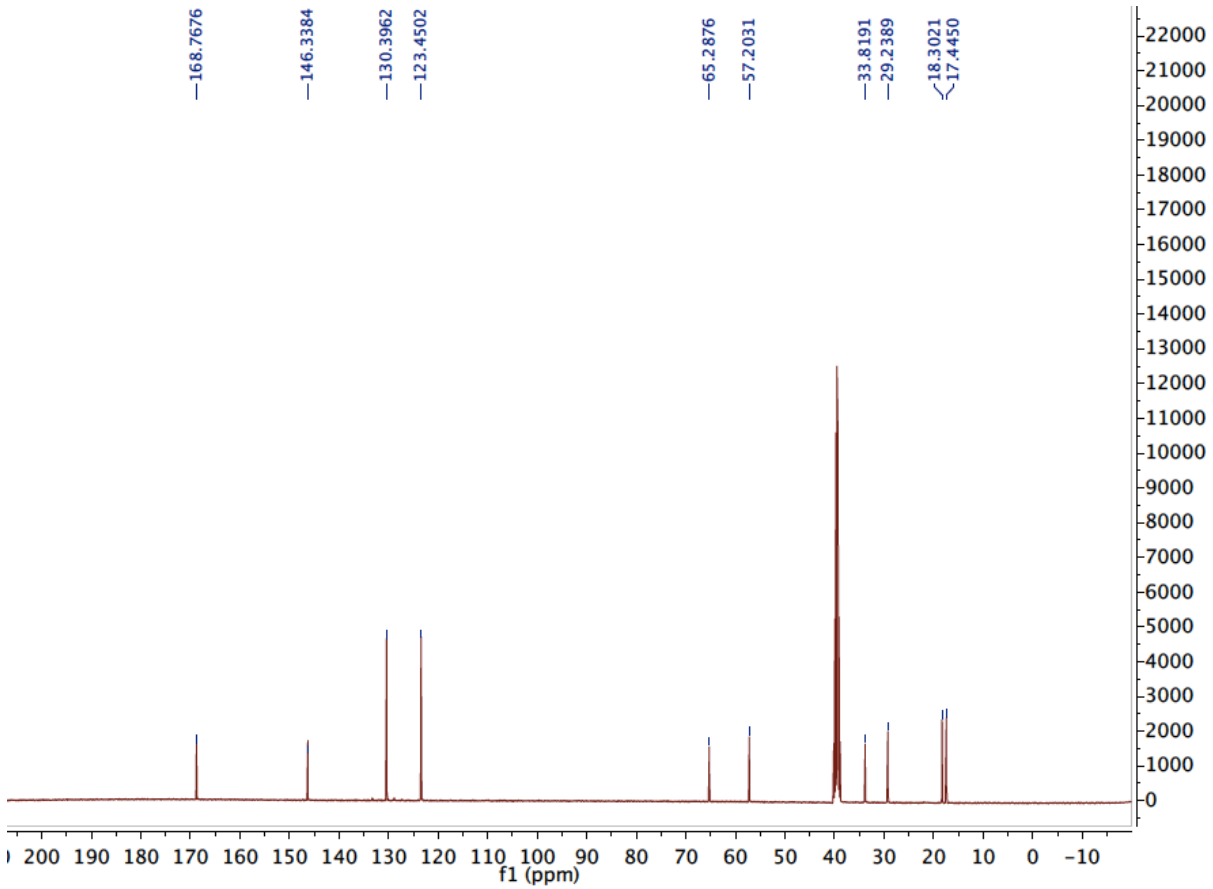

Compound 16

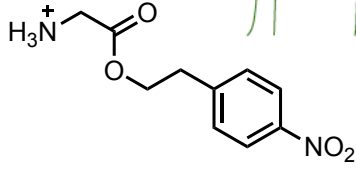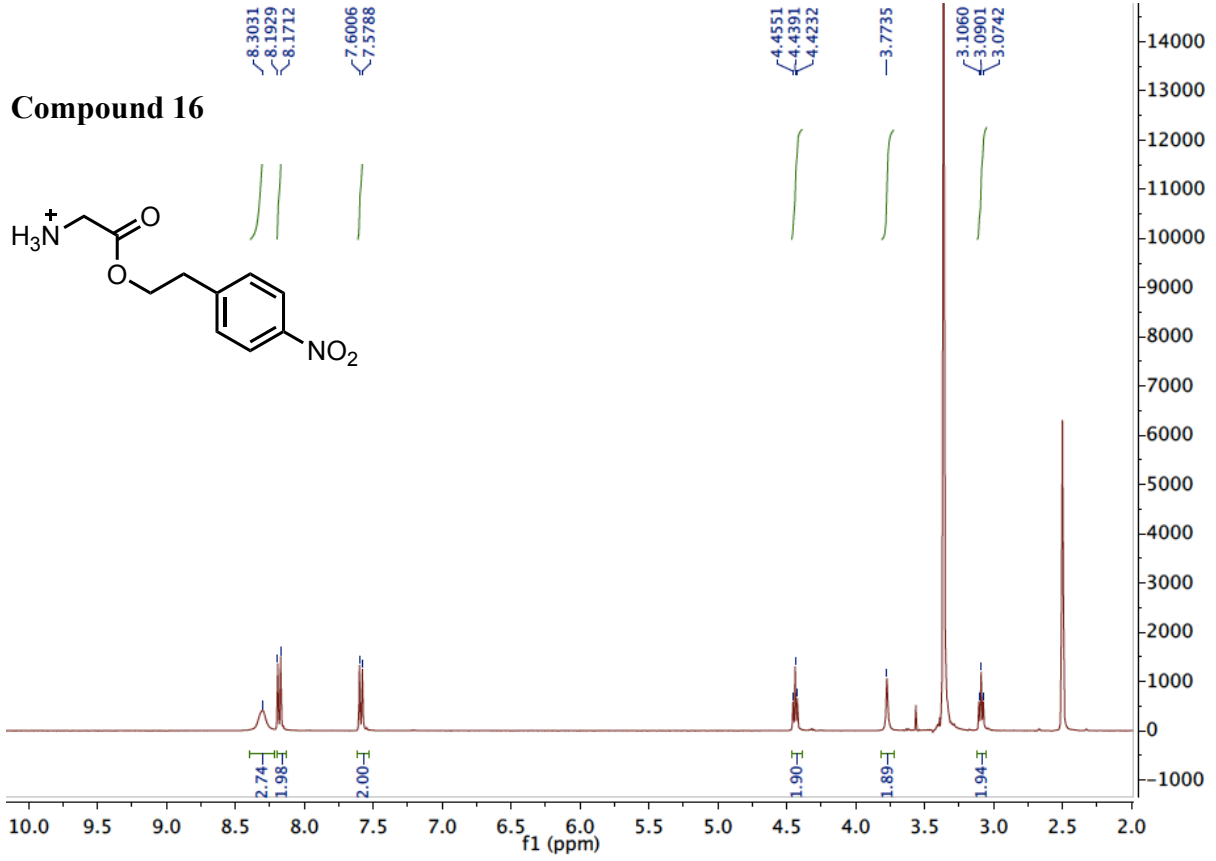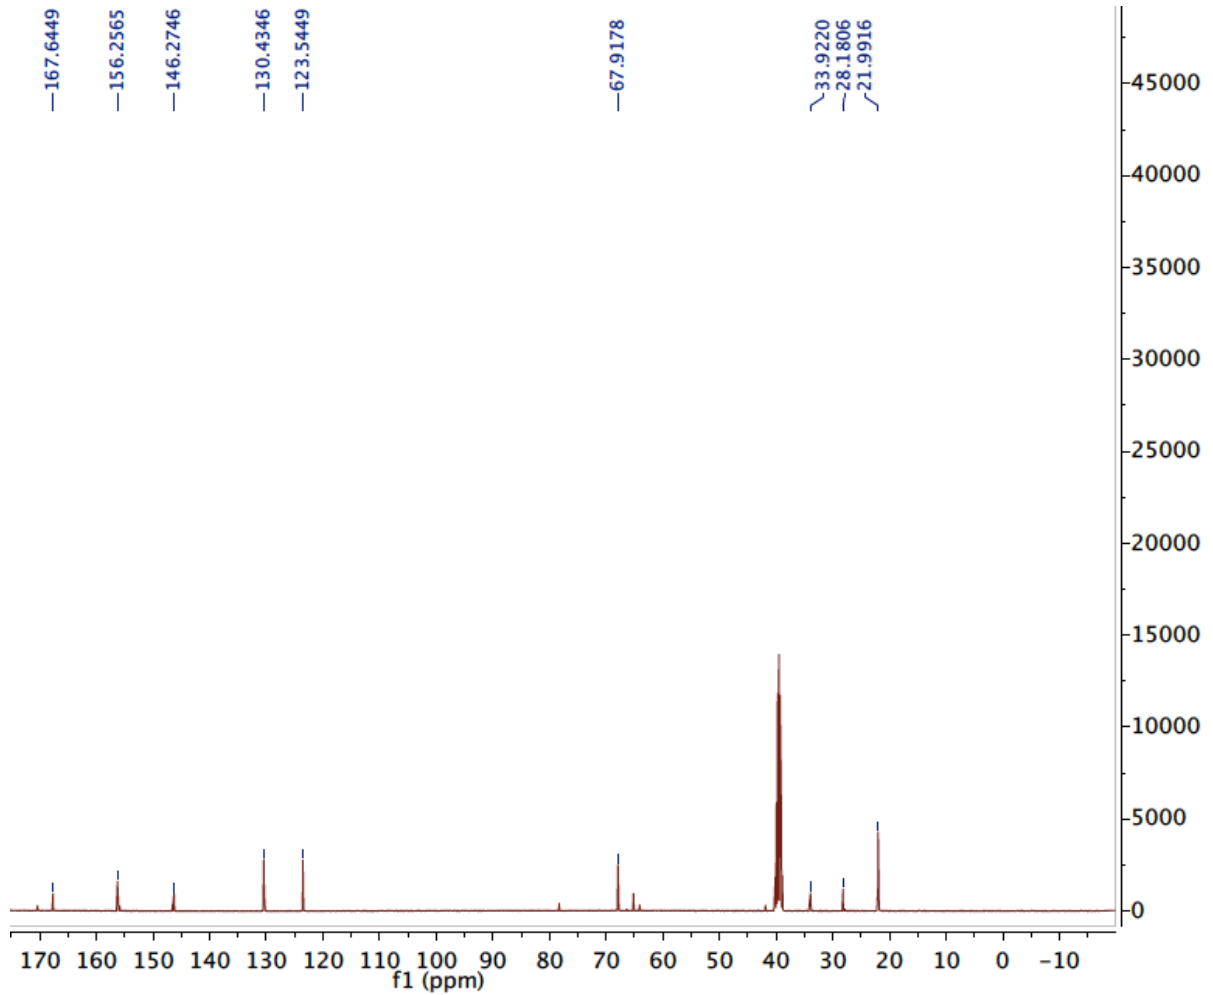

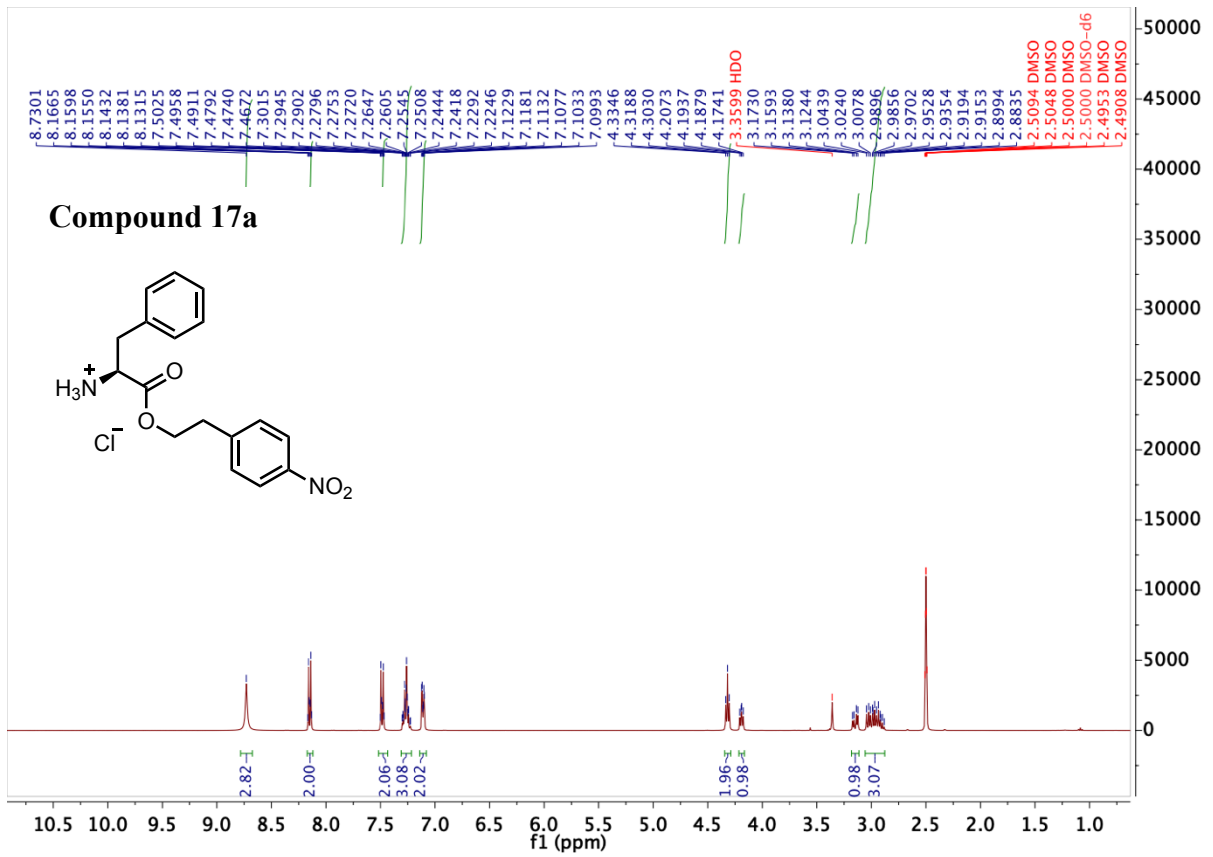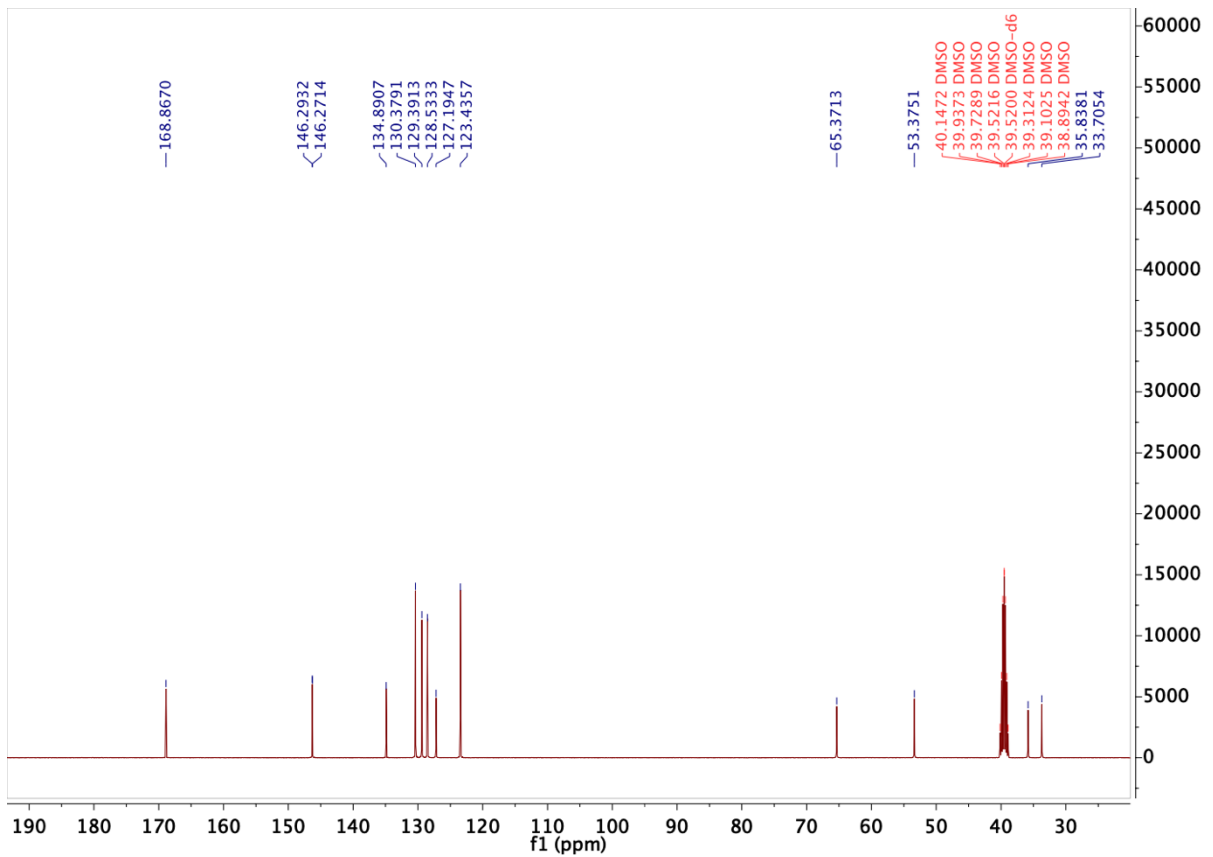

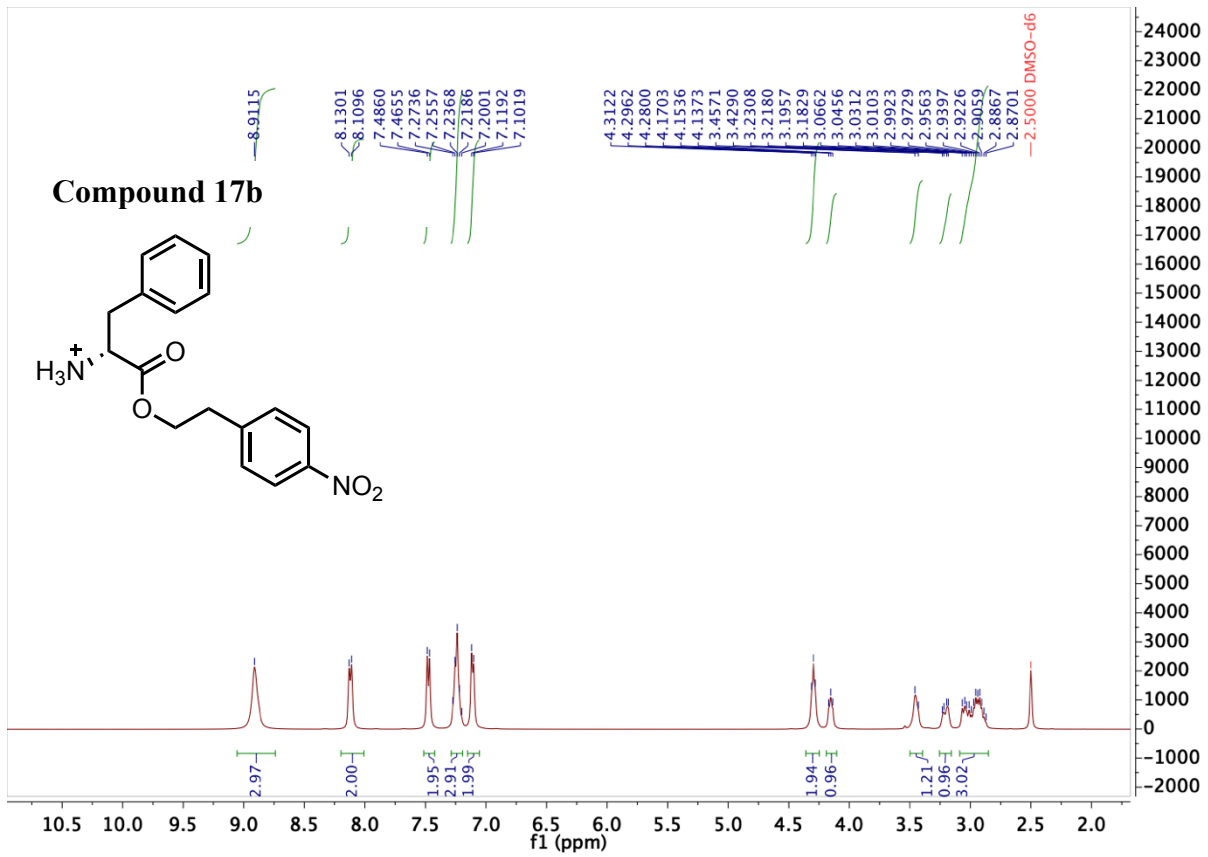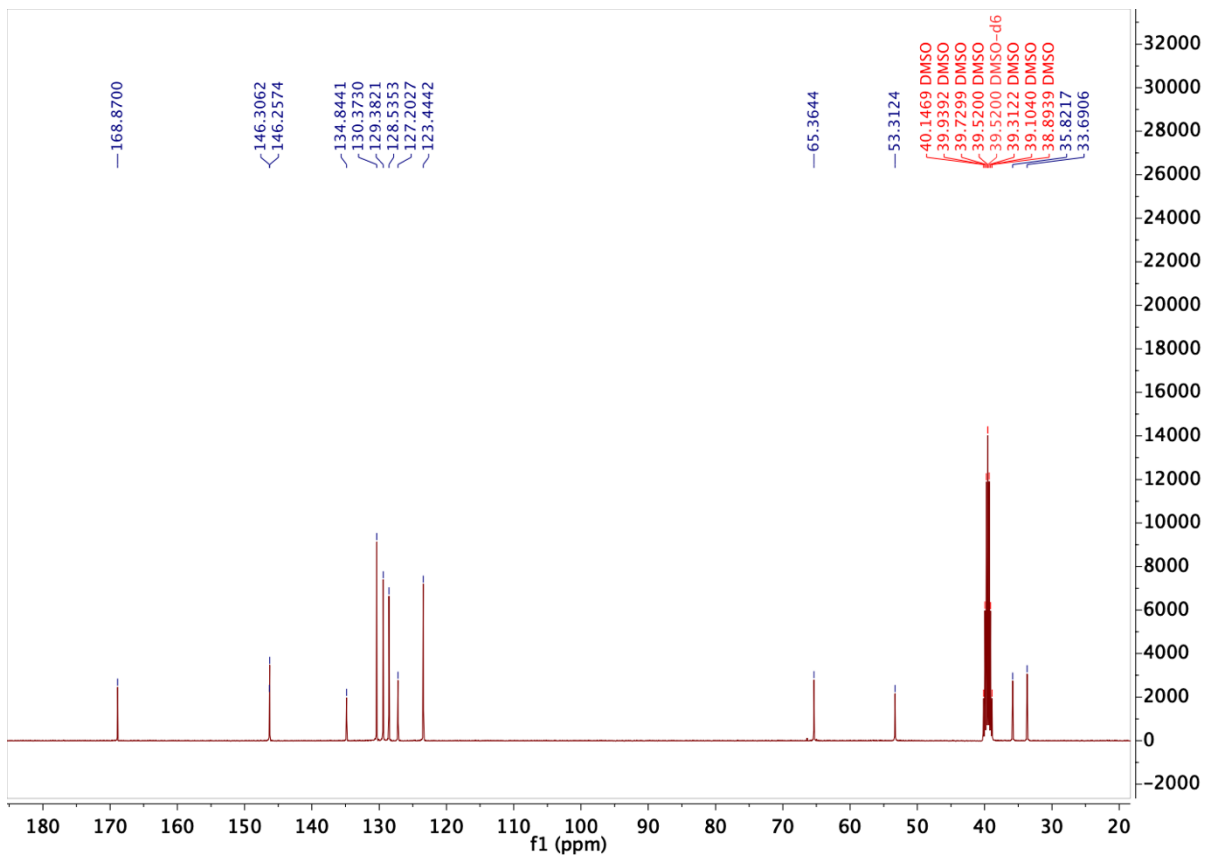

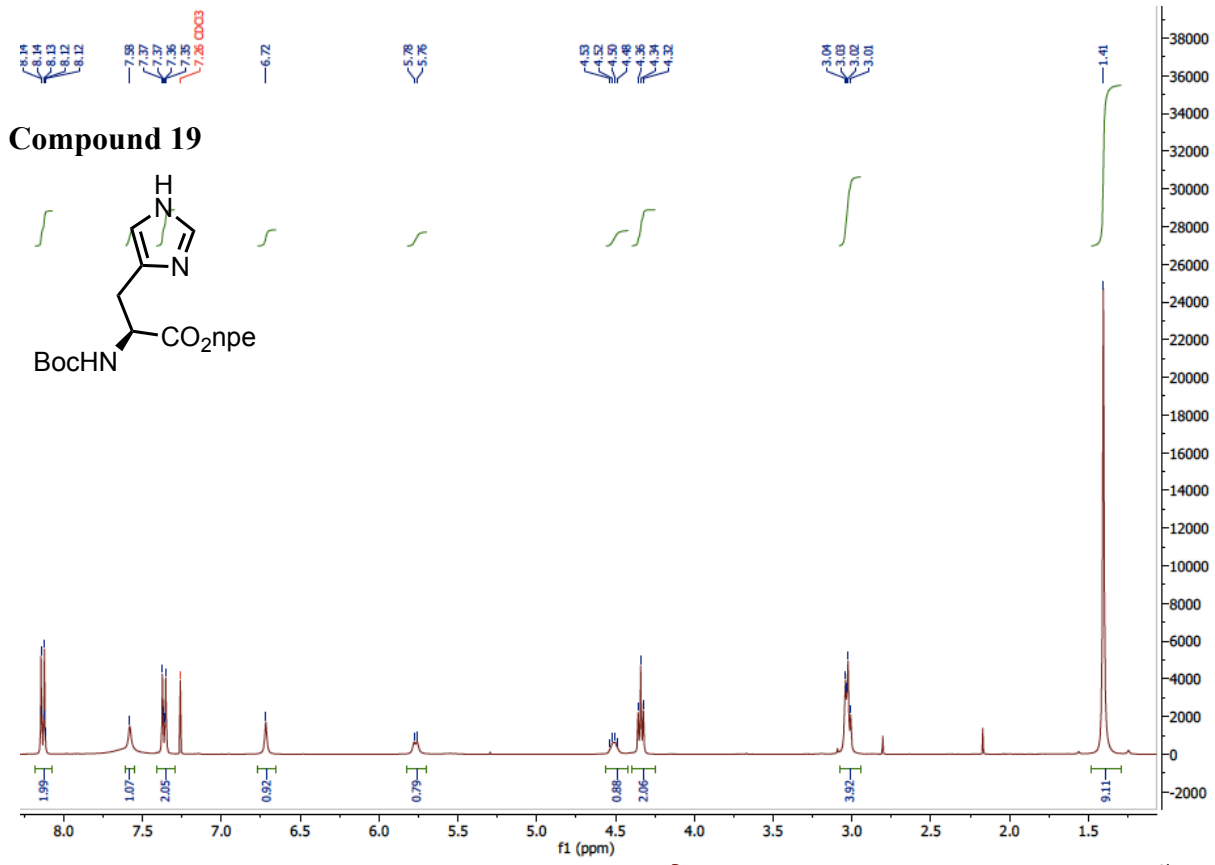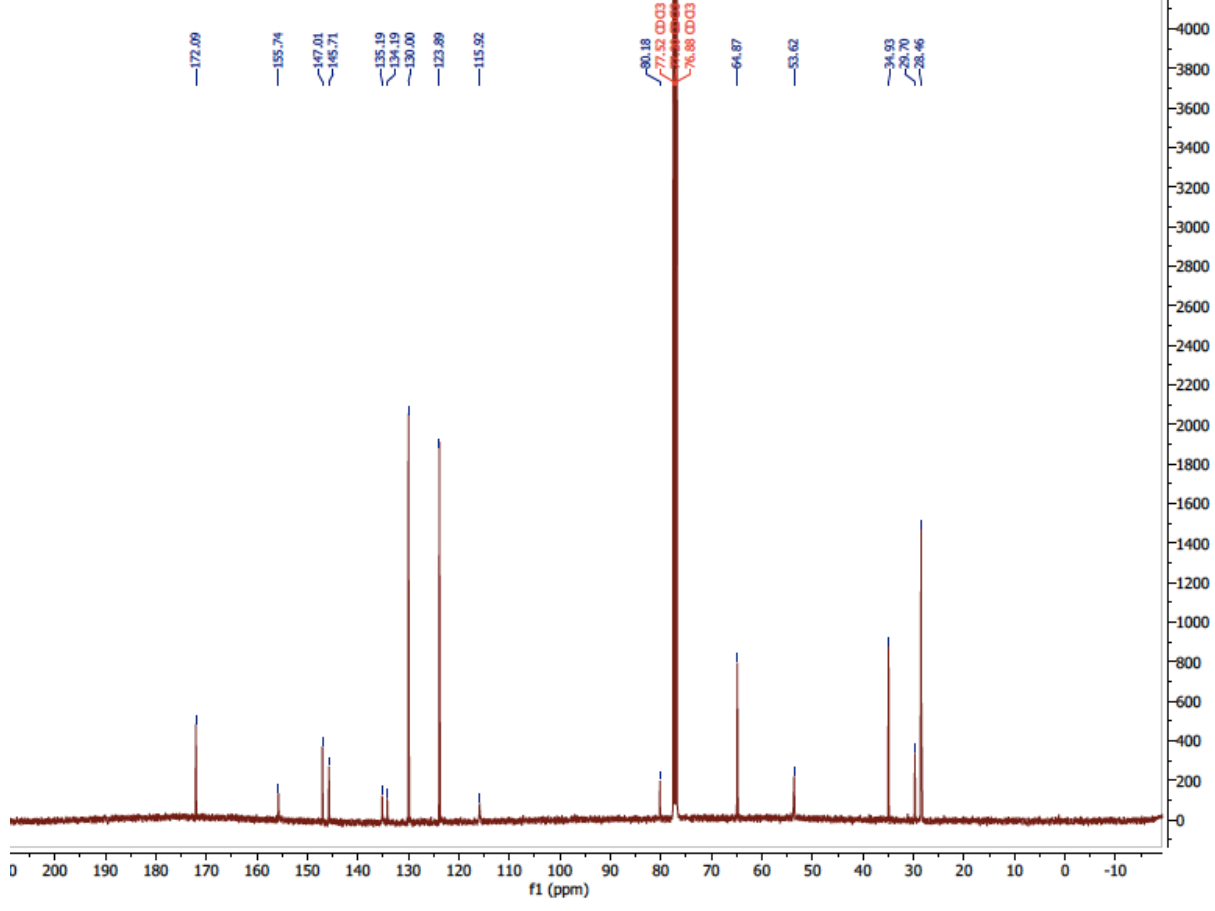

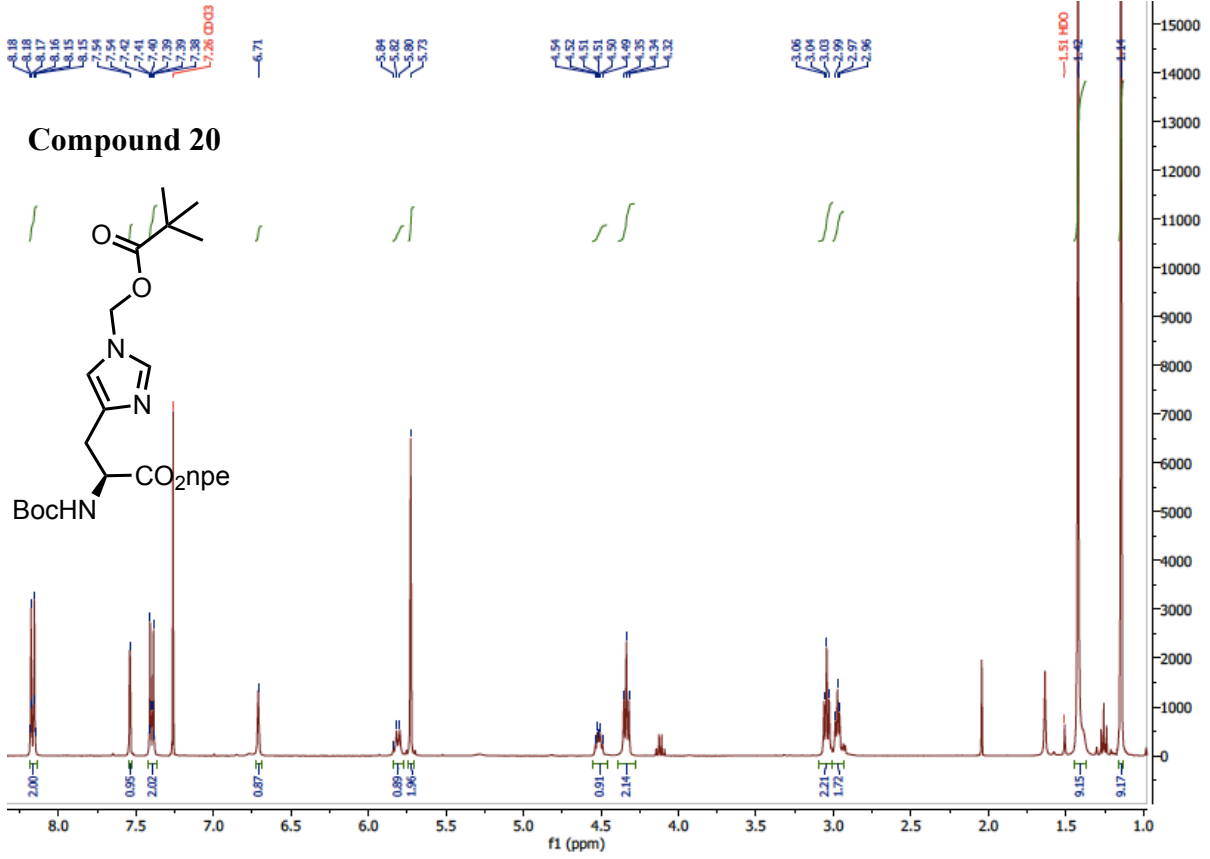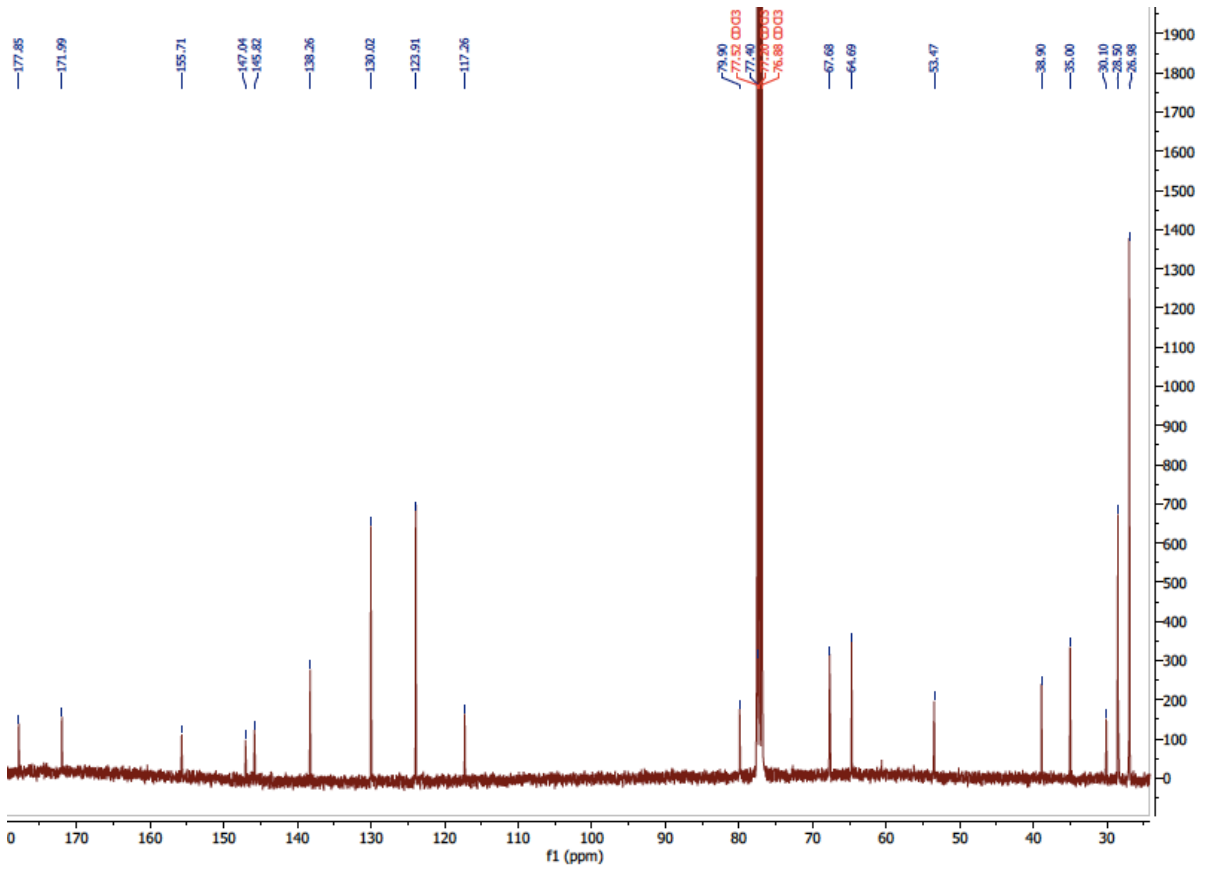



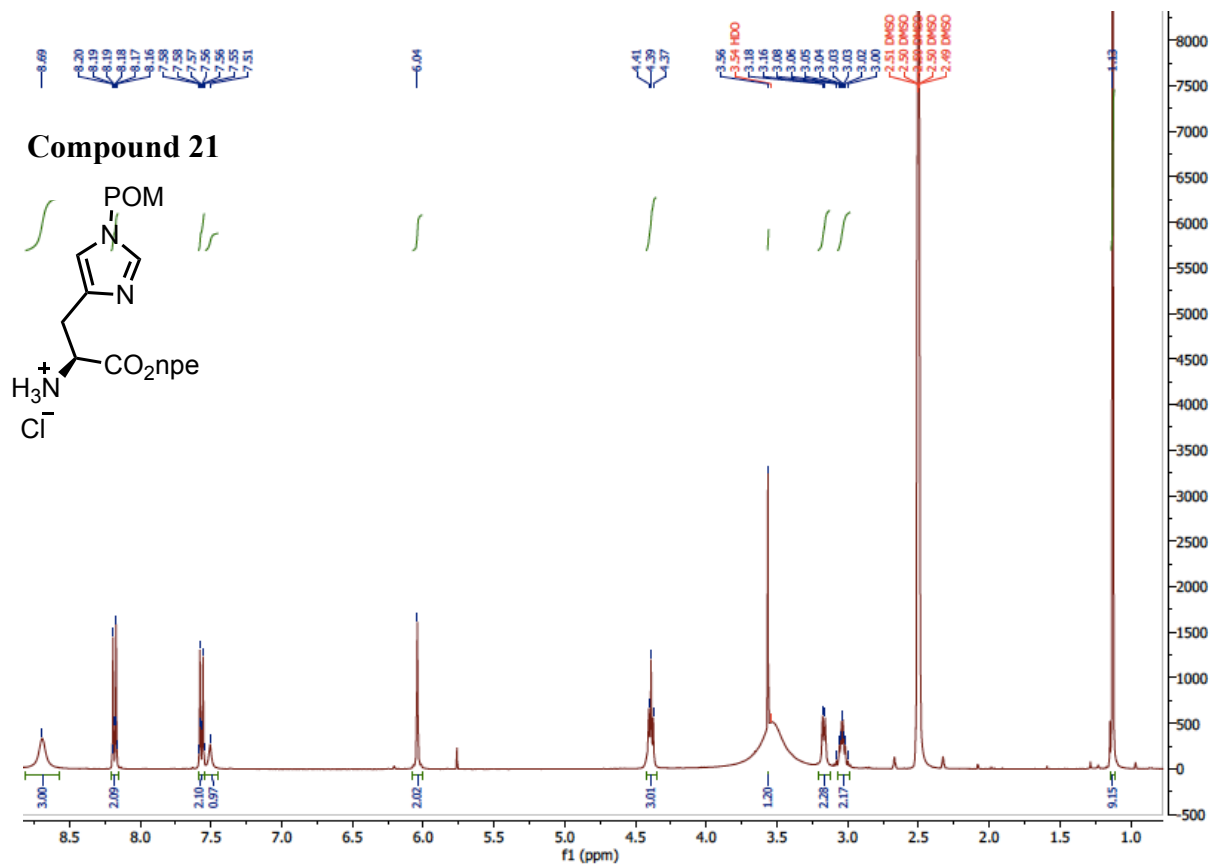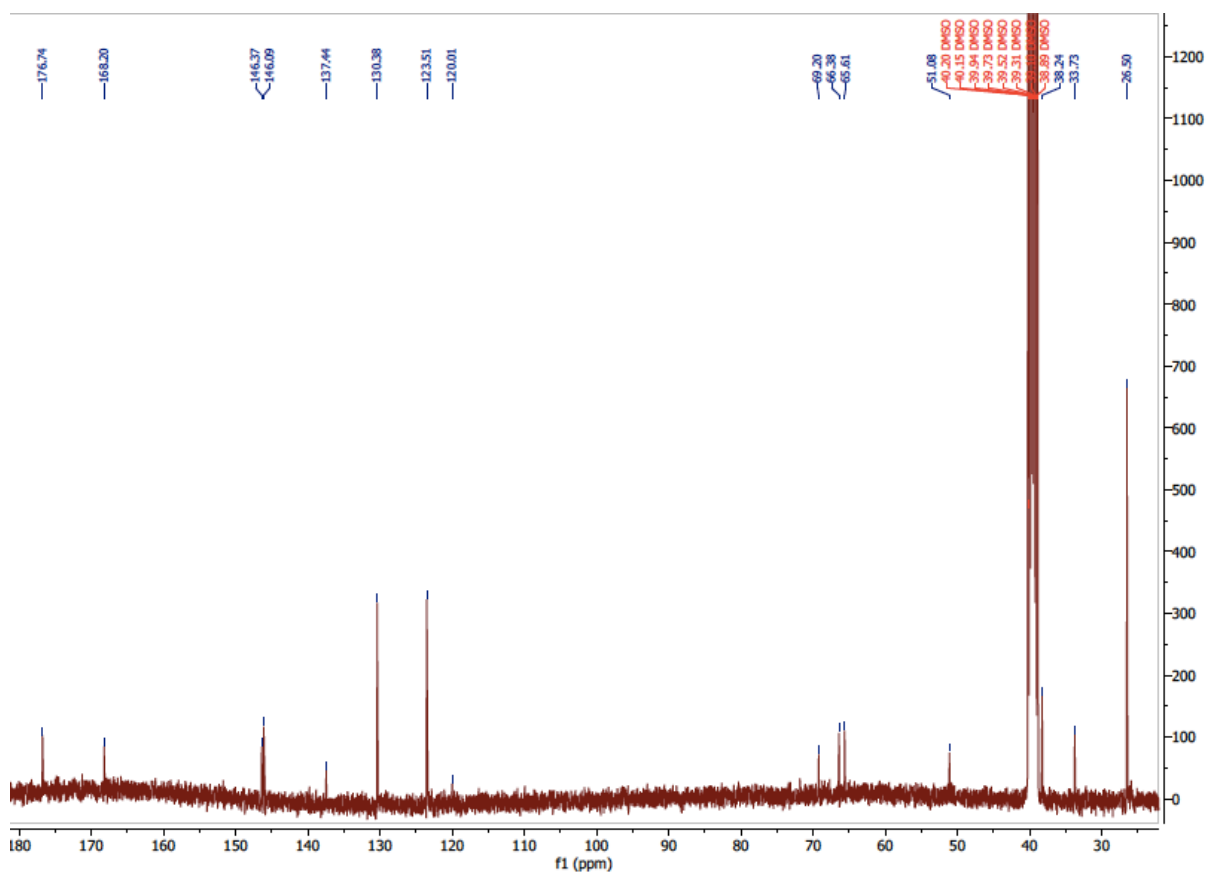

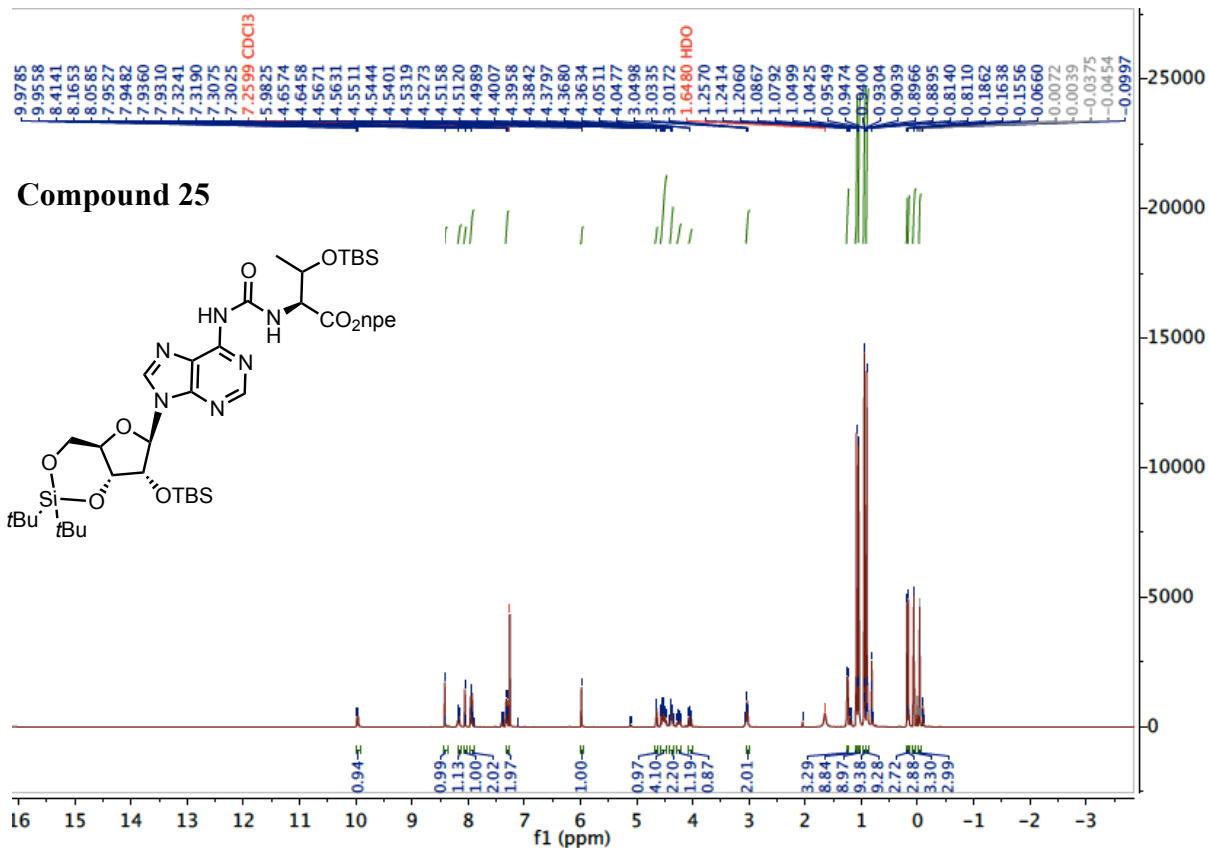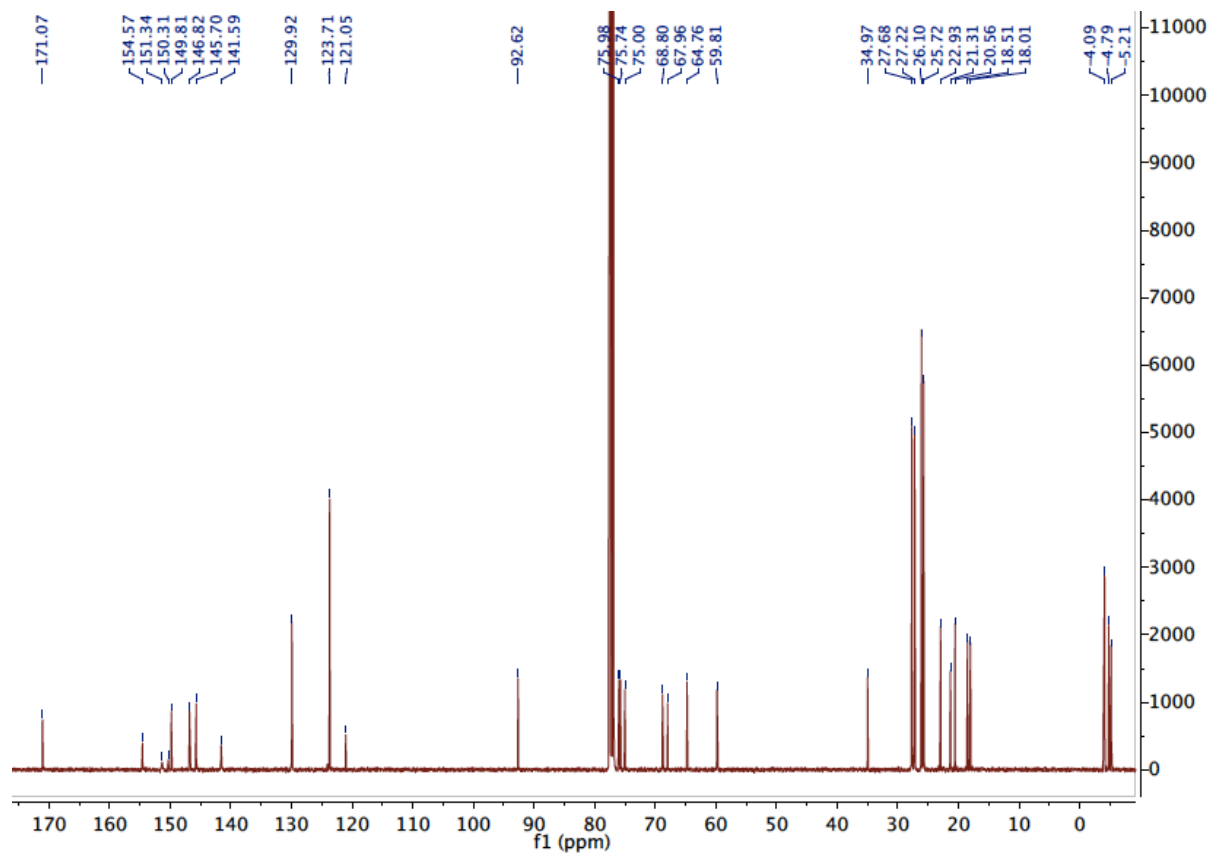

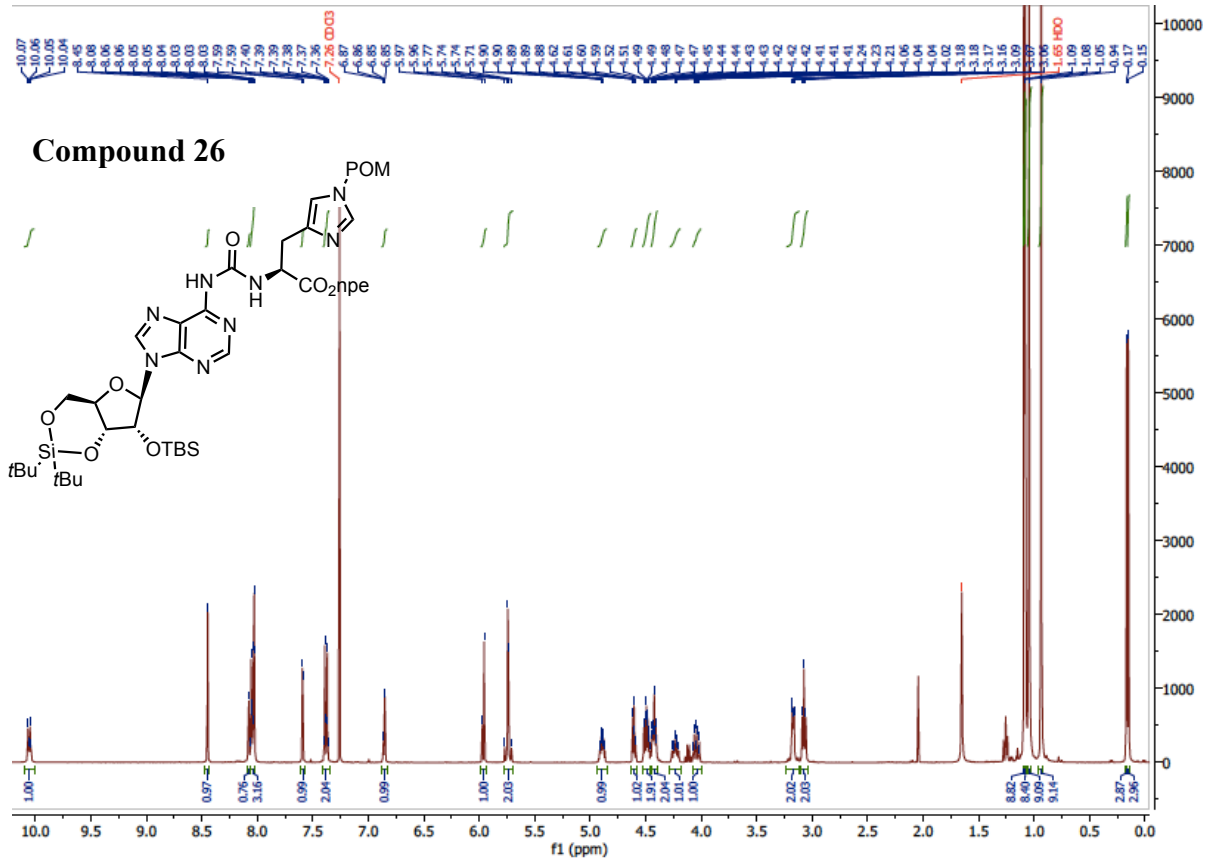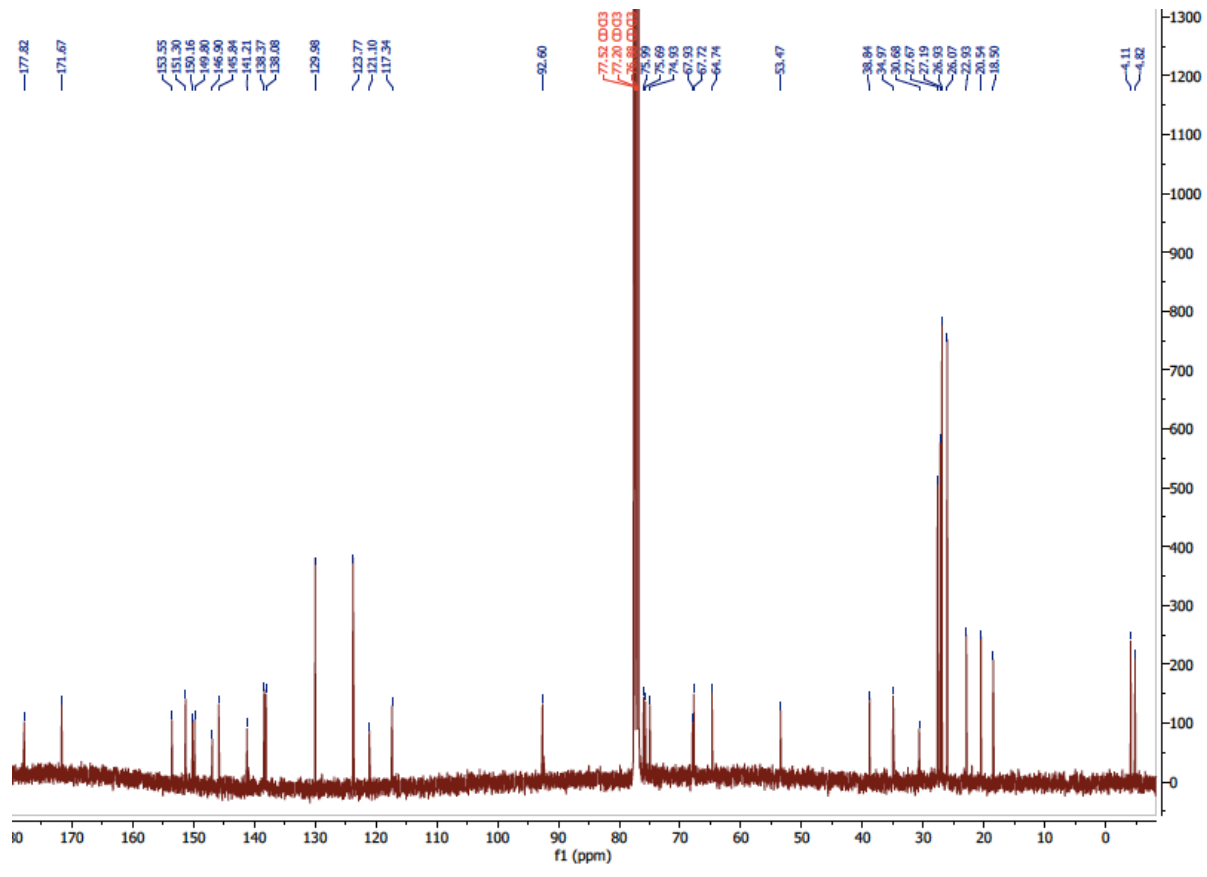

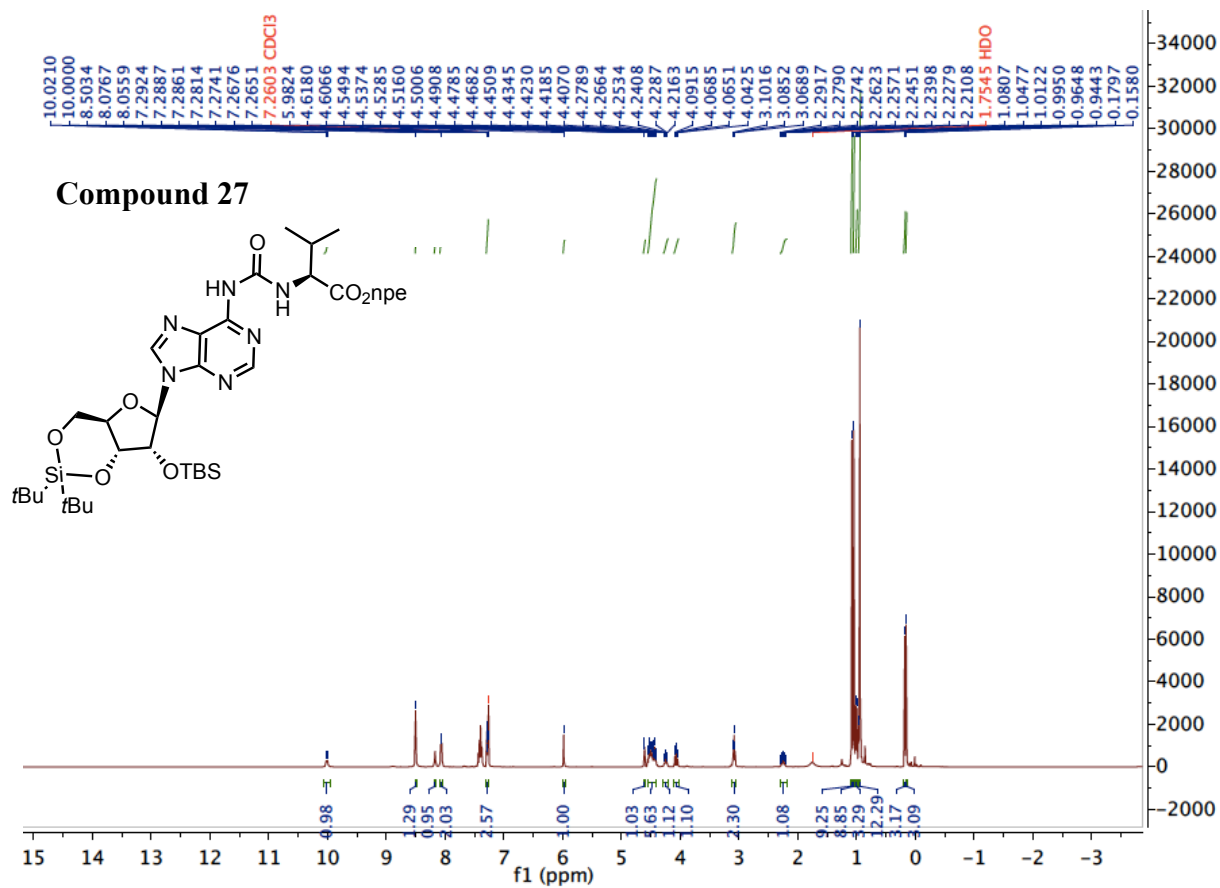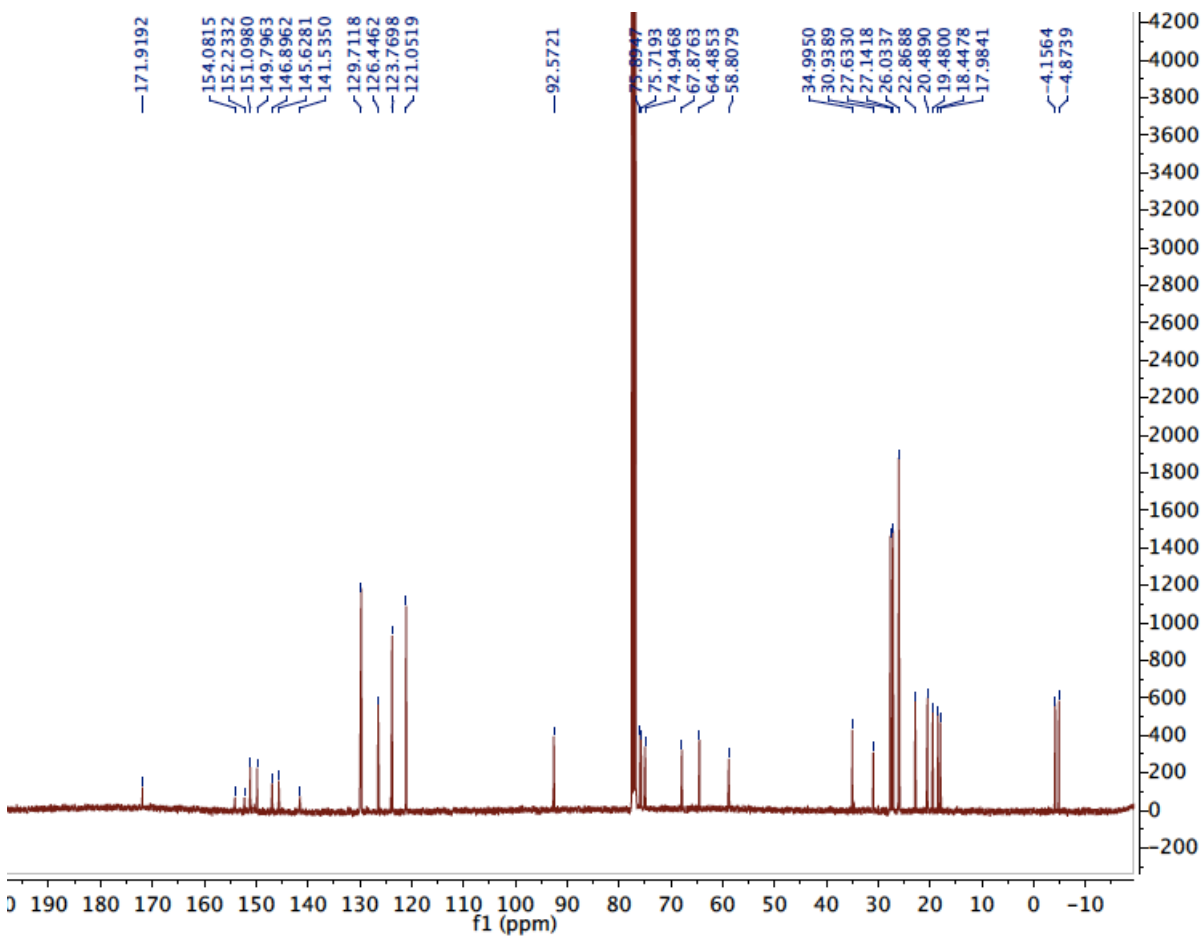

### Compound 28

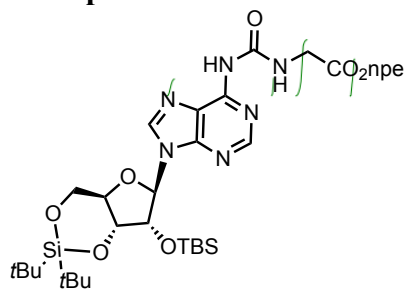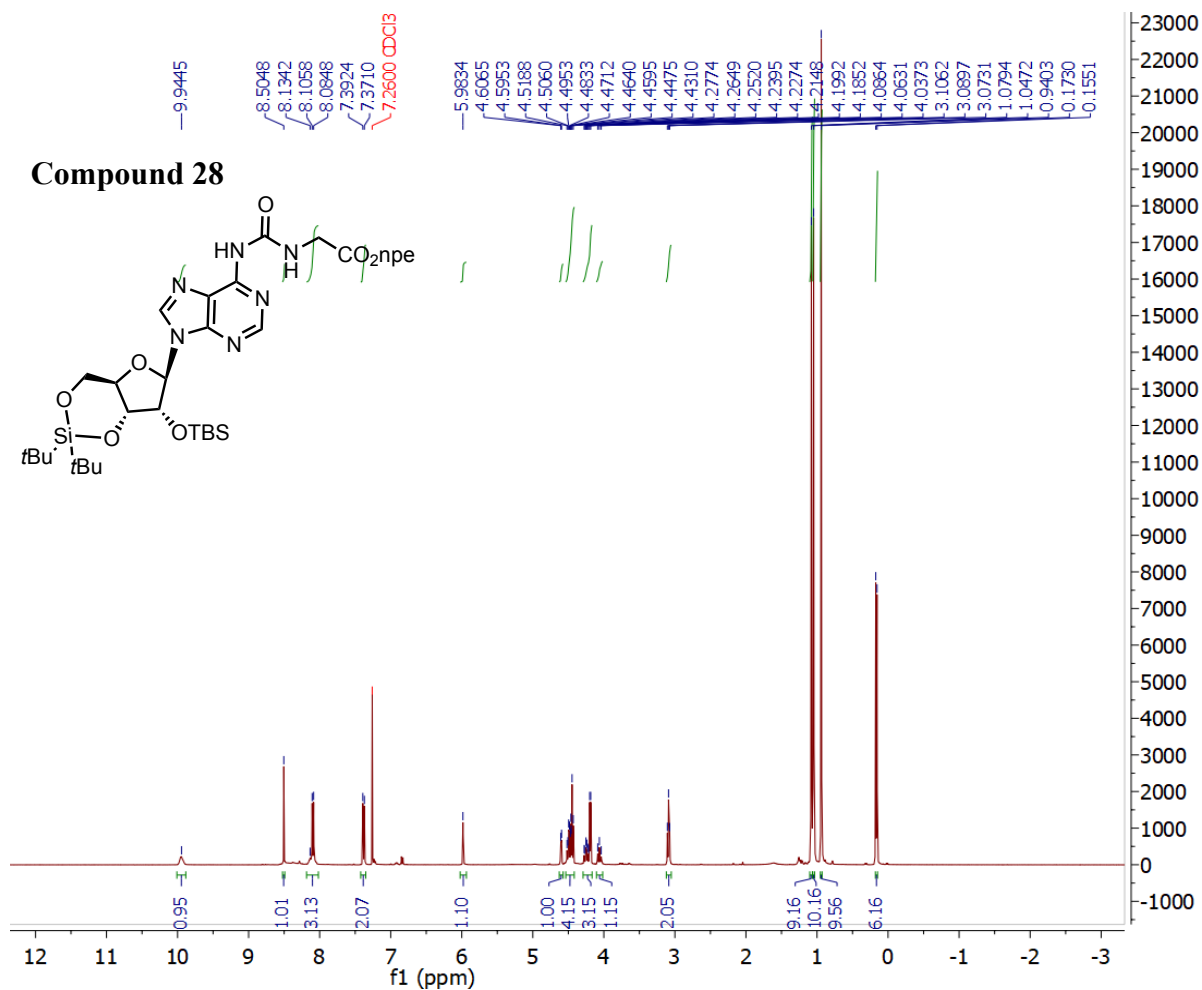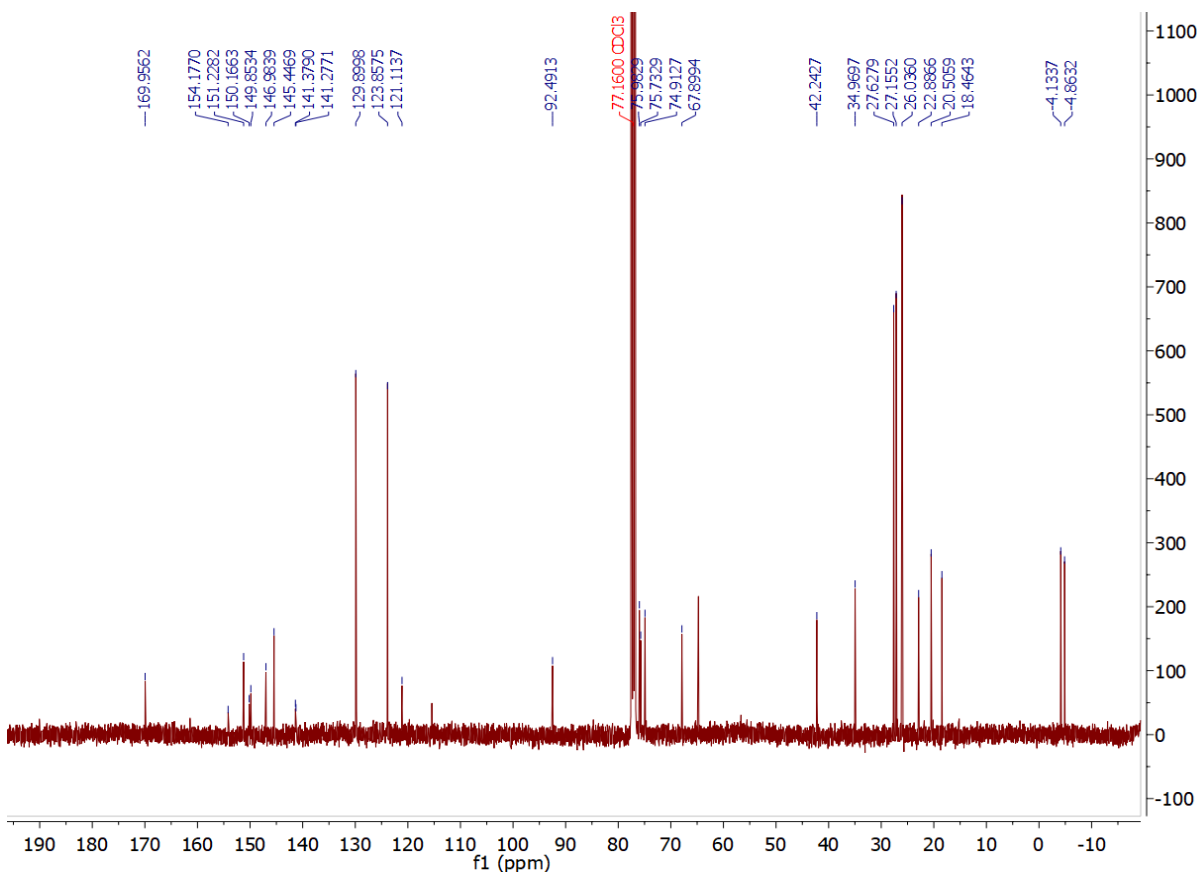

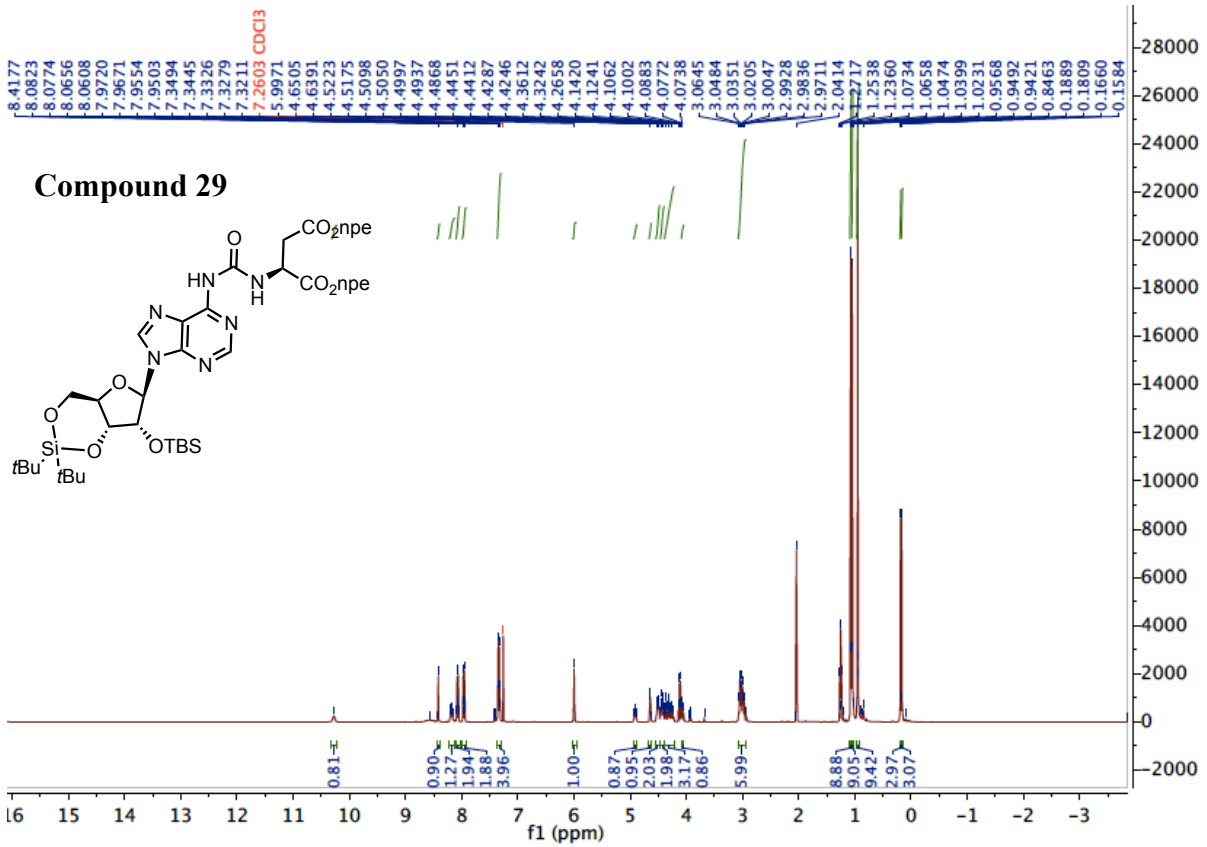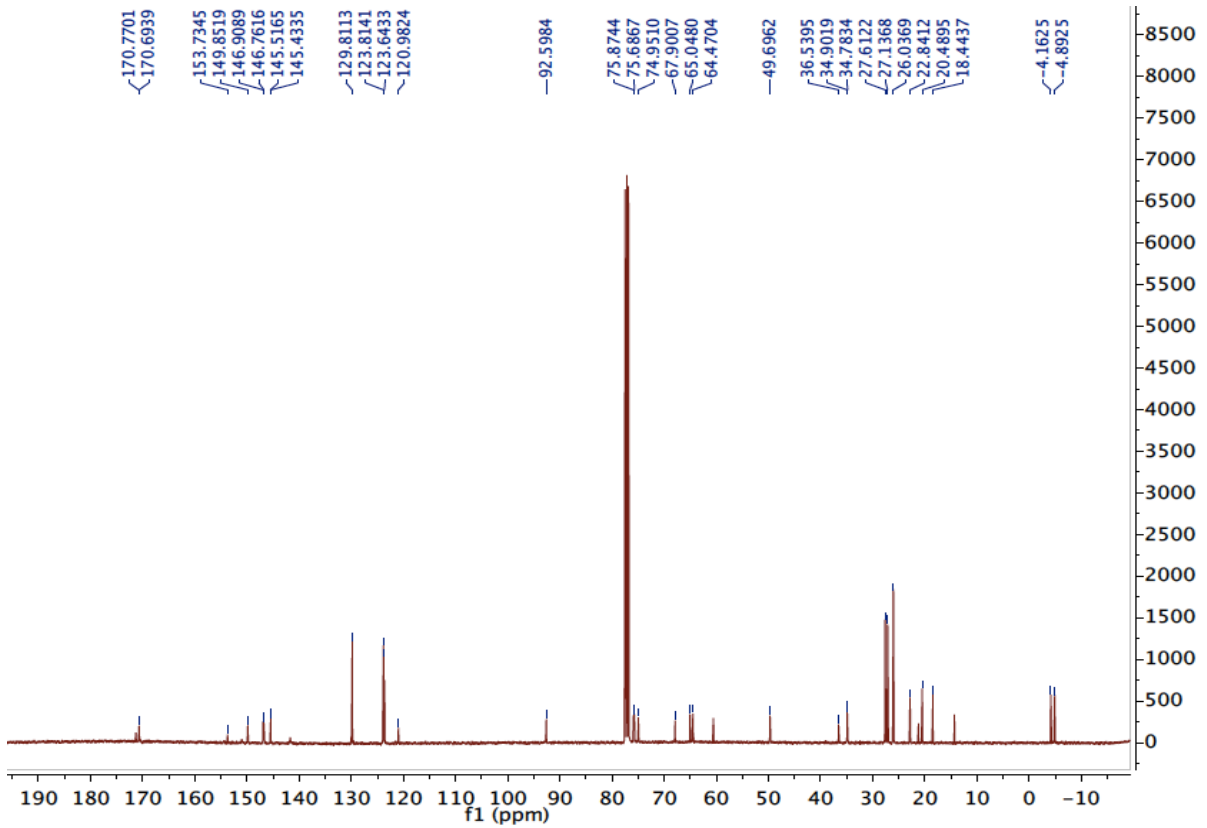

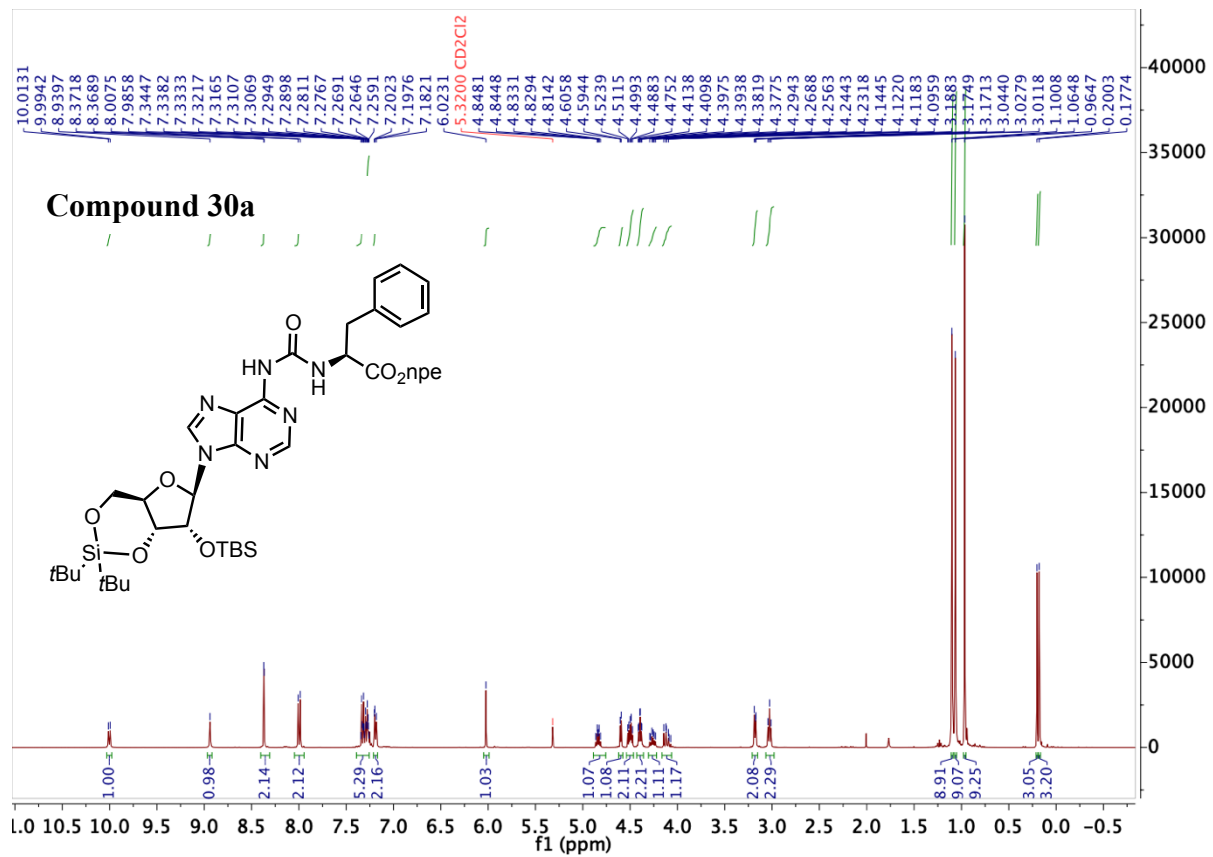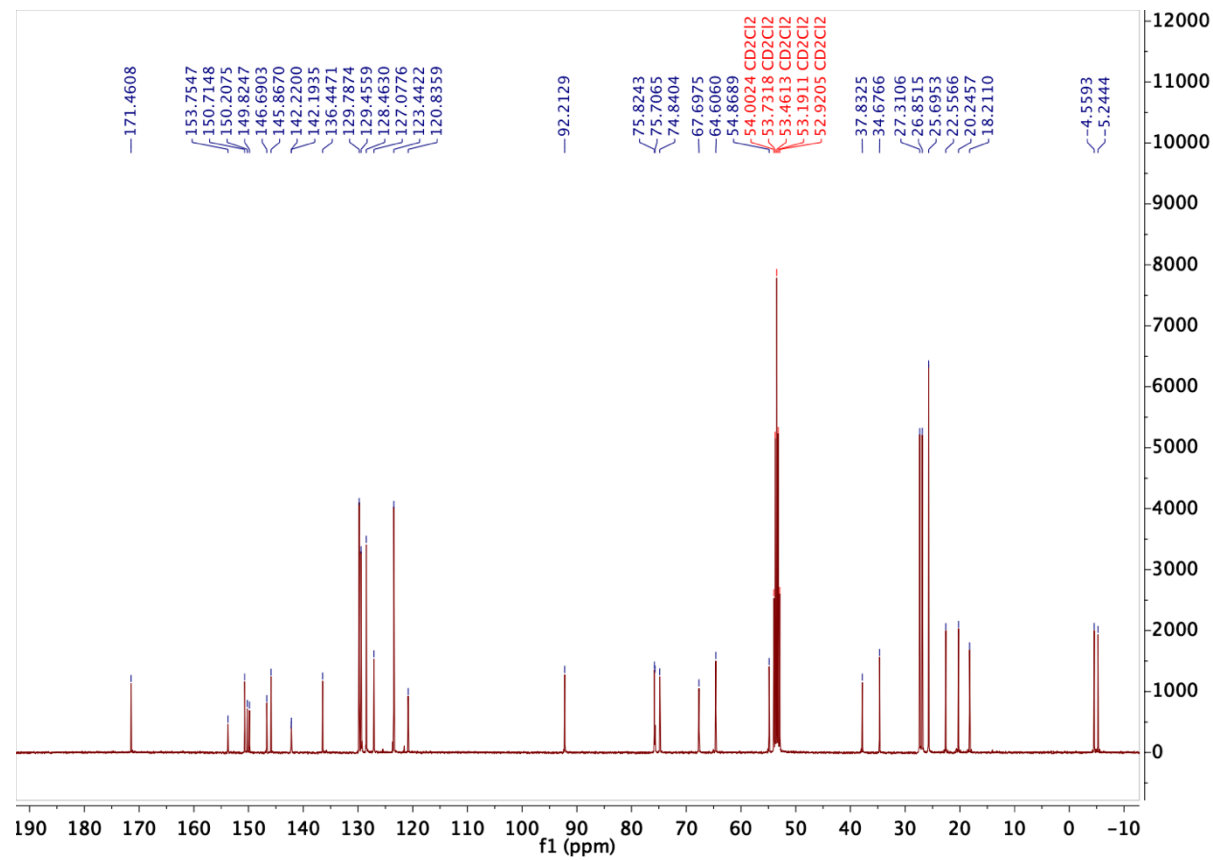

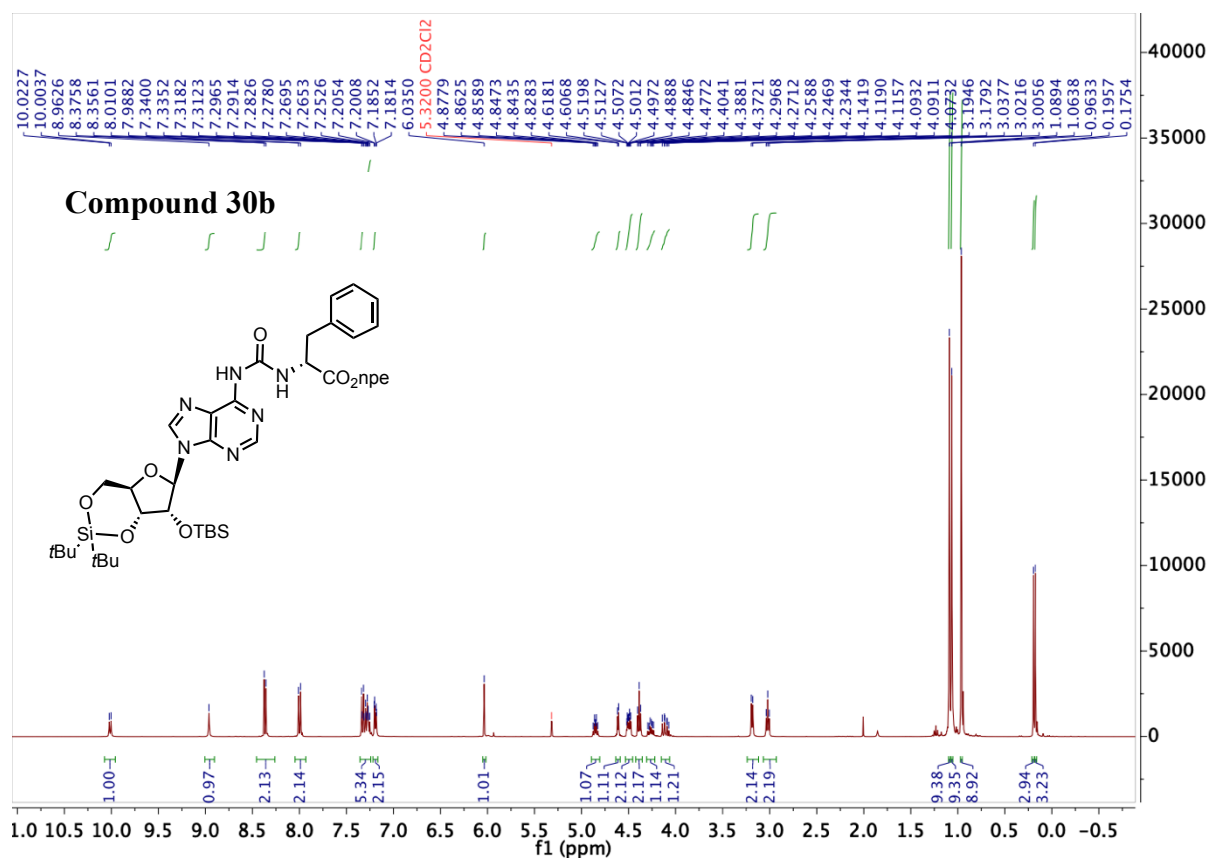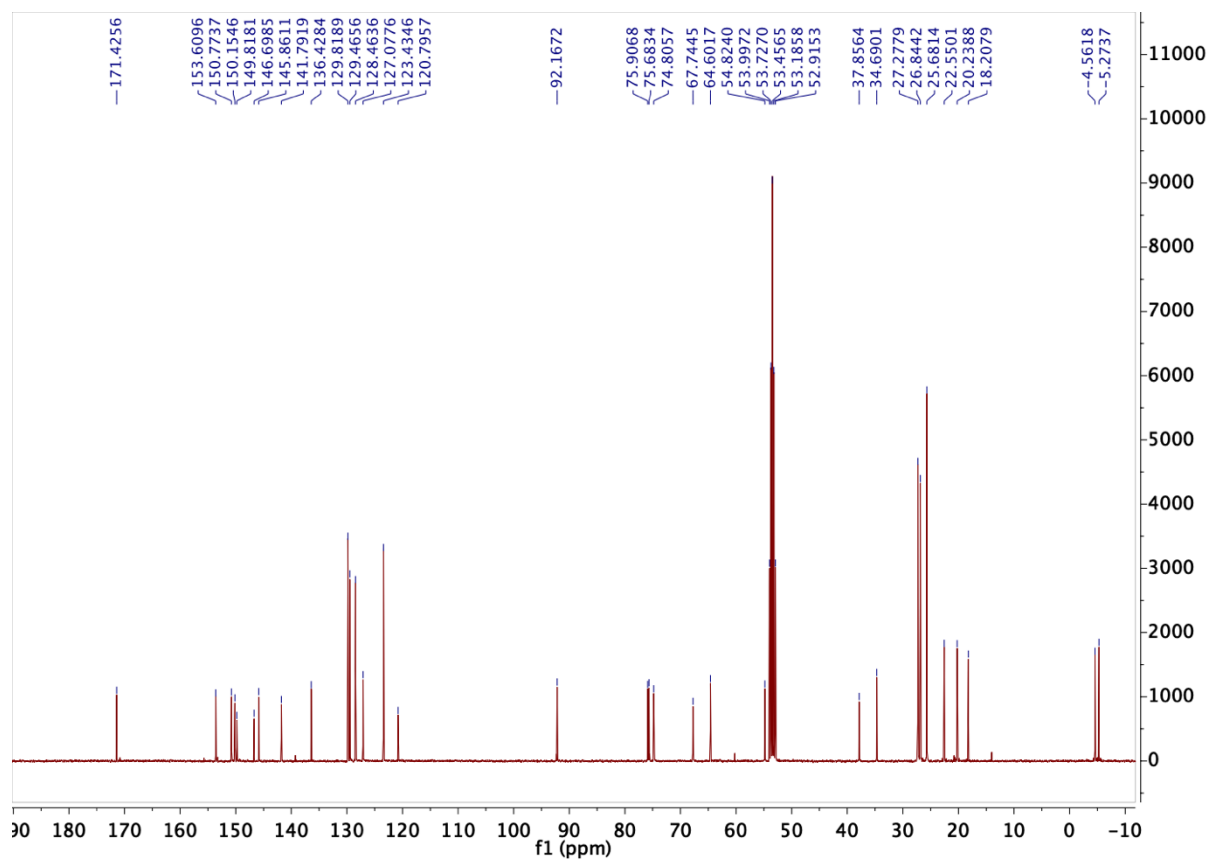



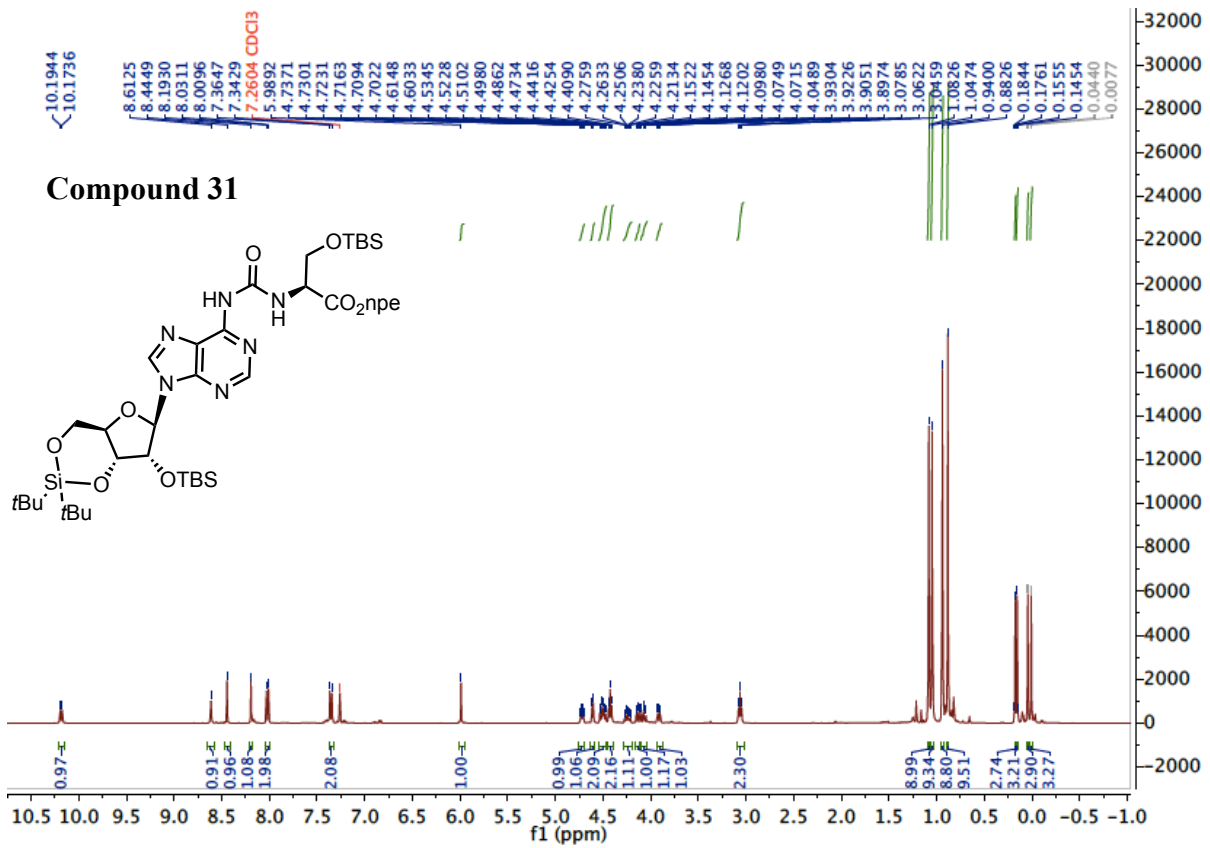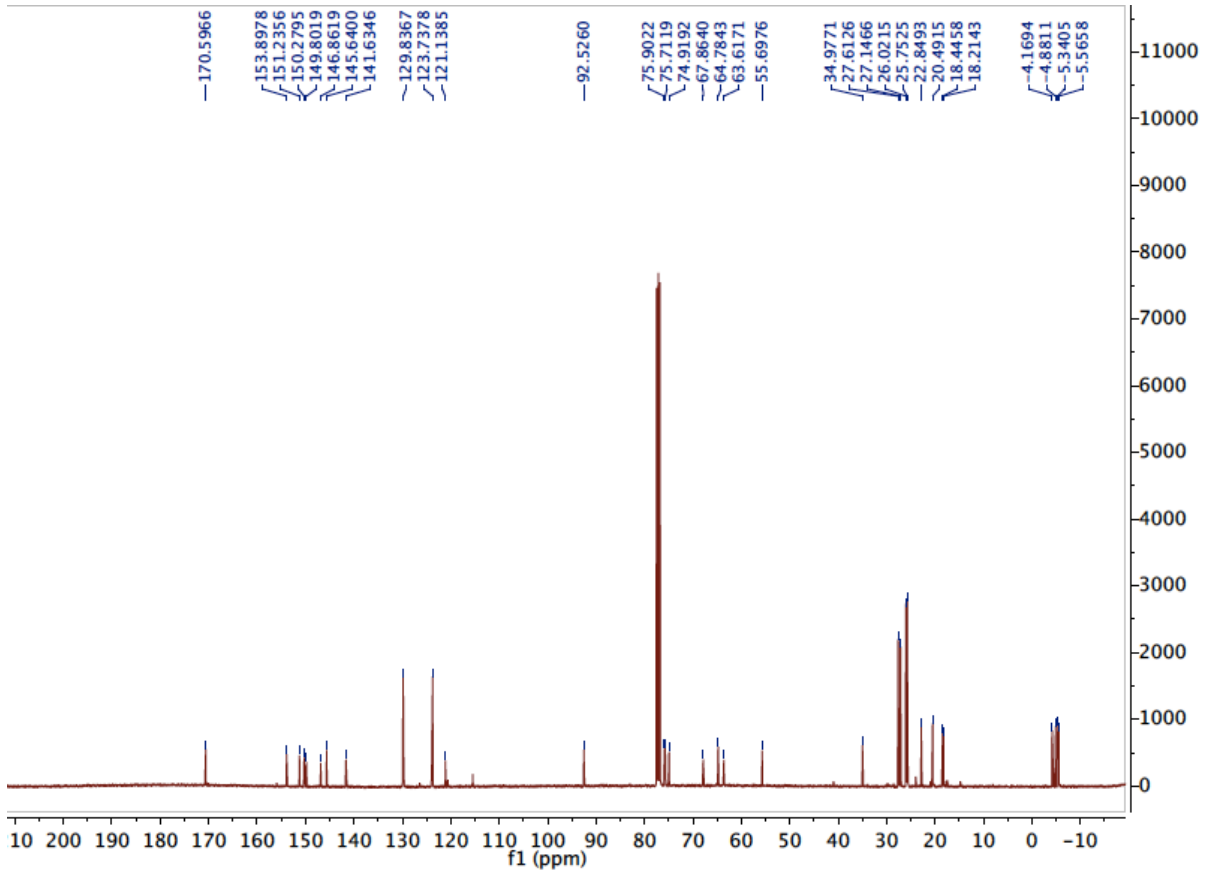

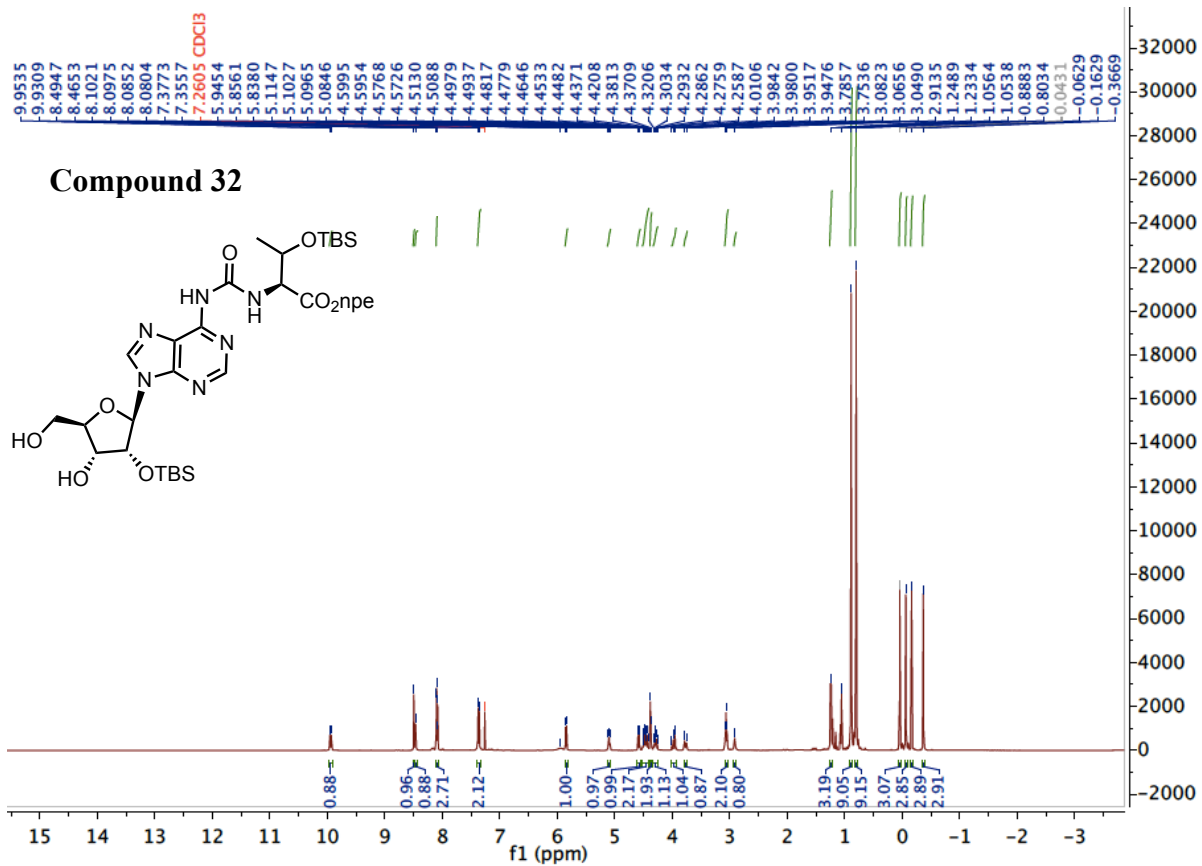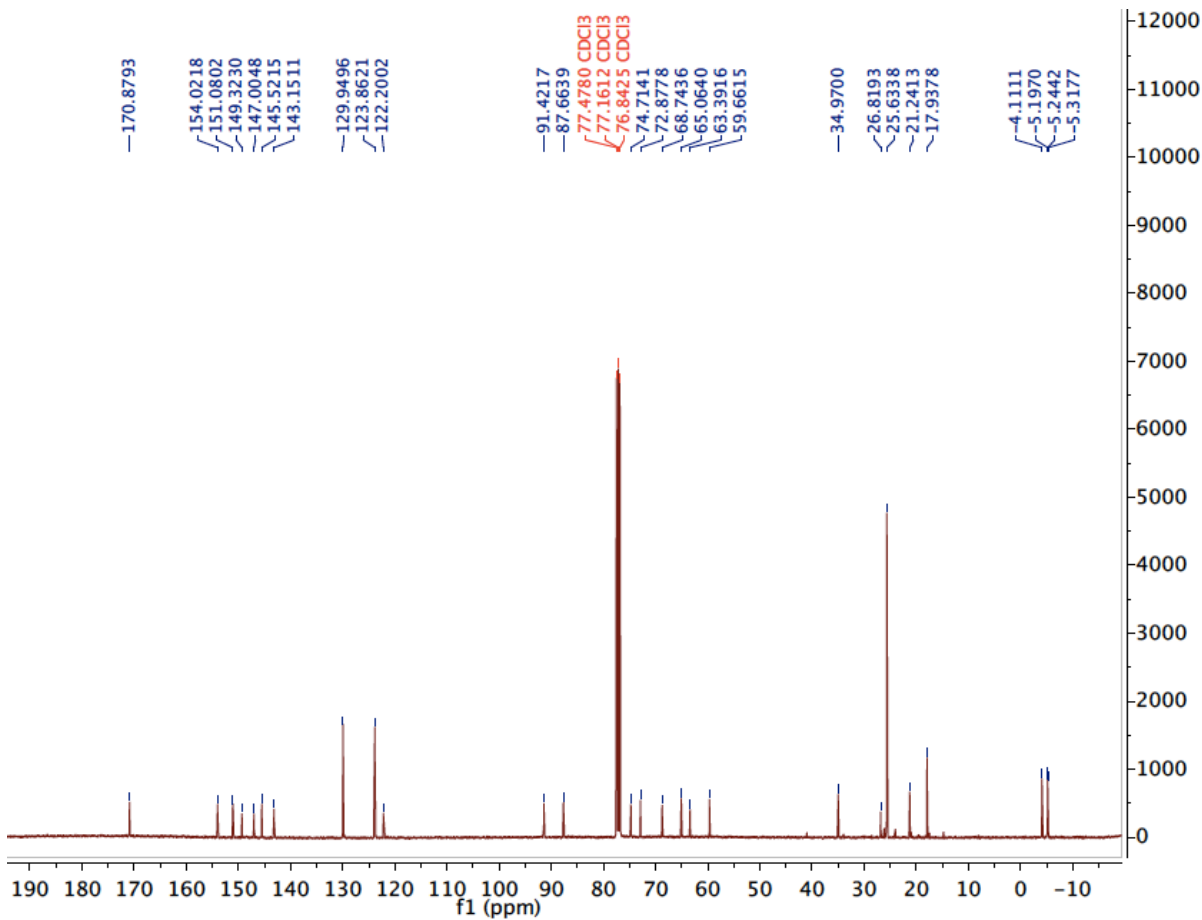

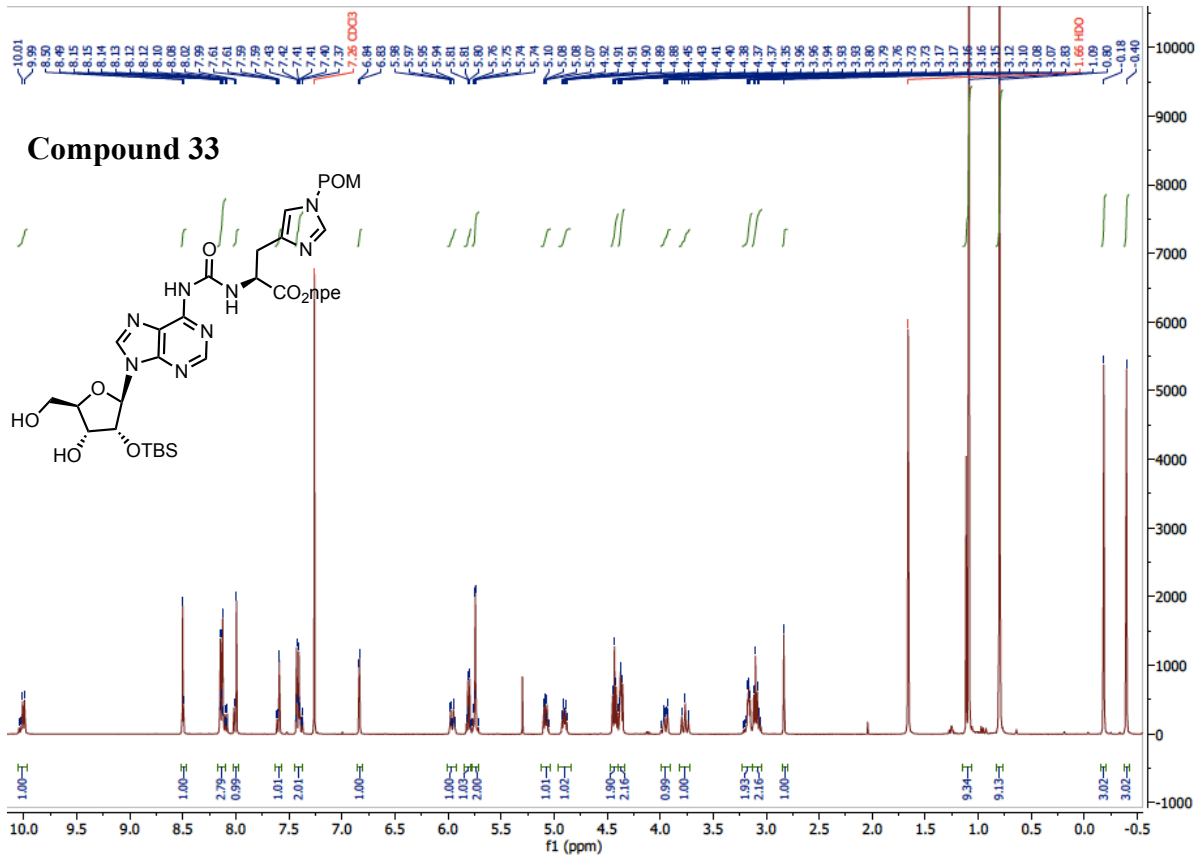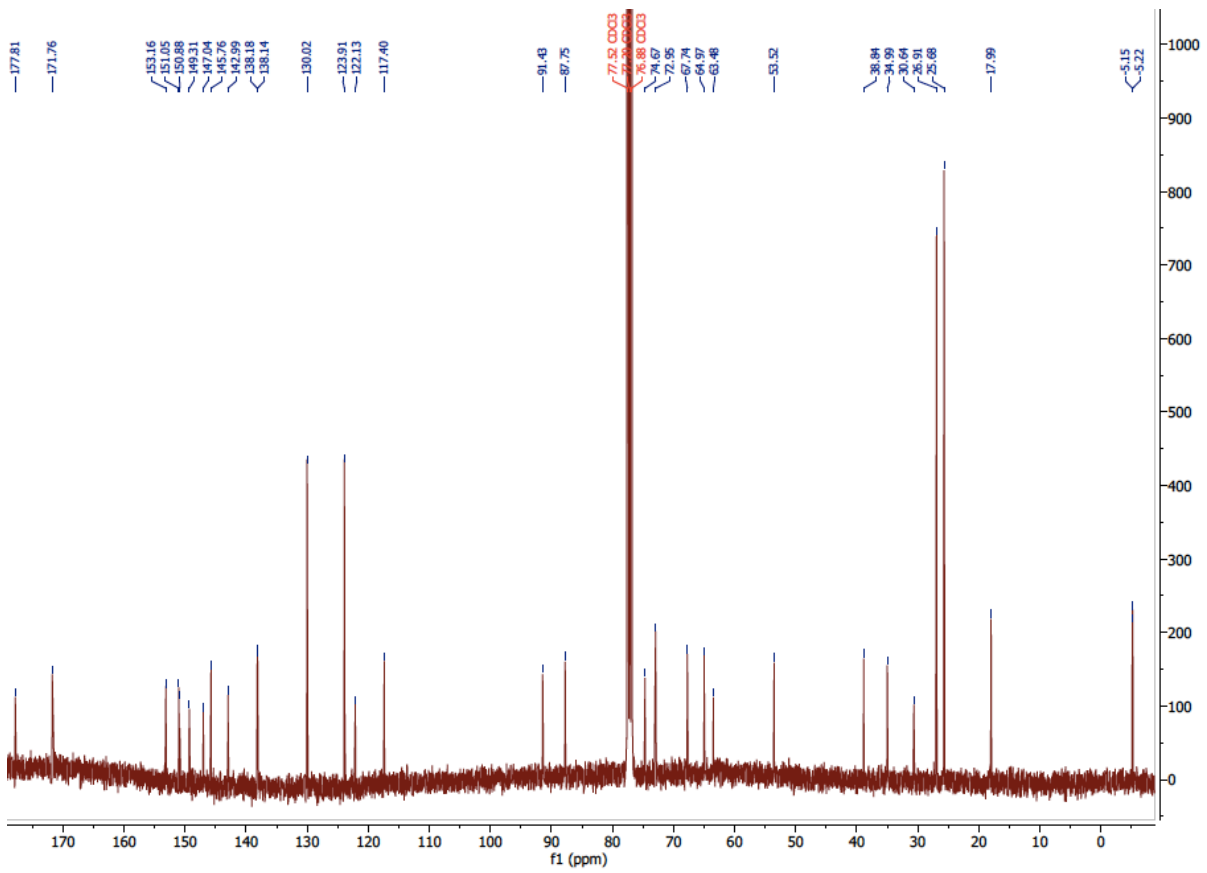

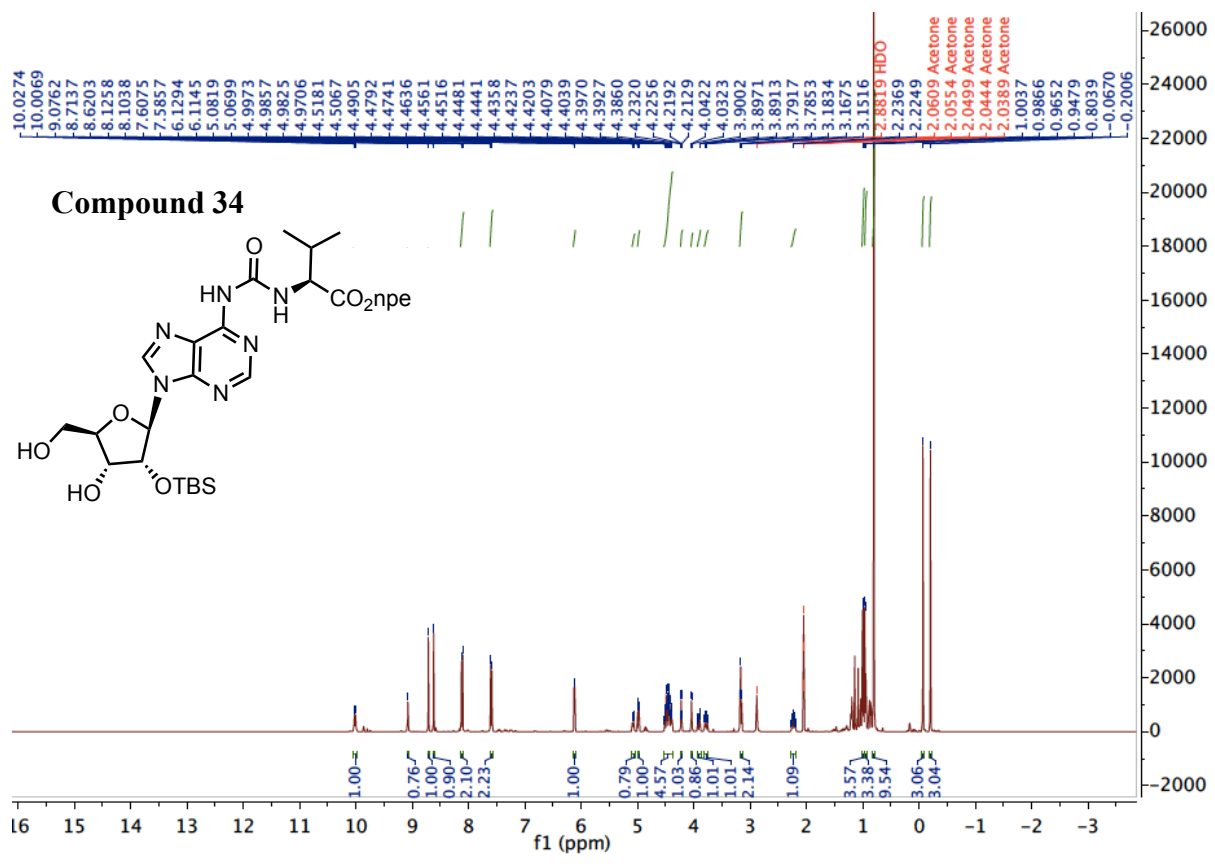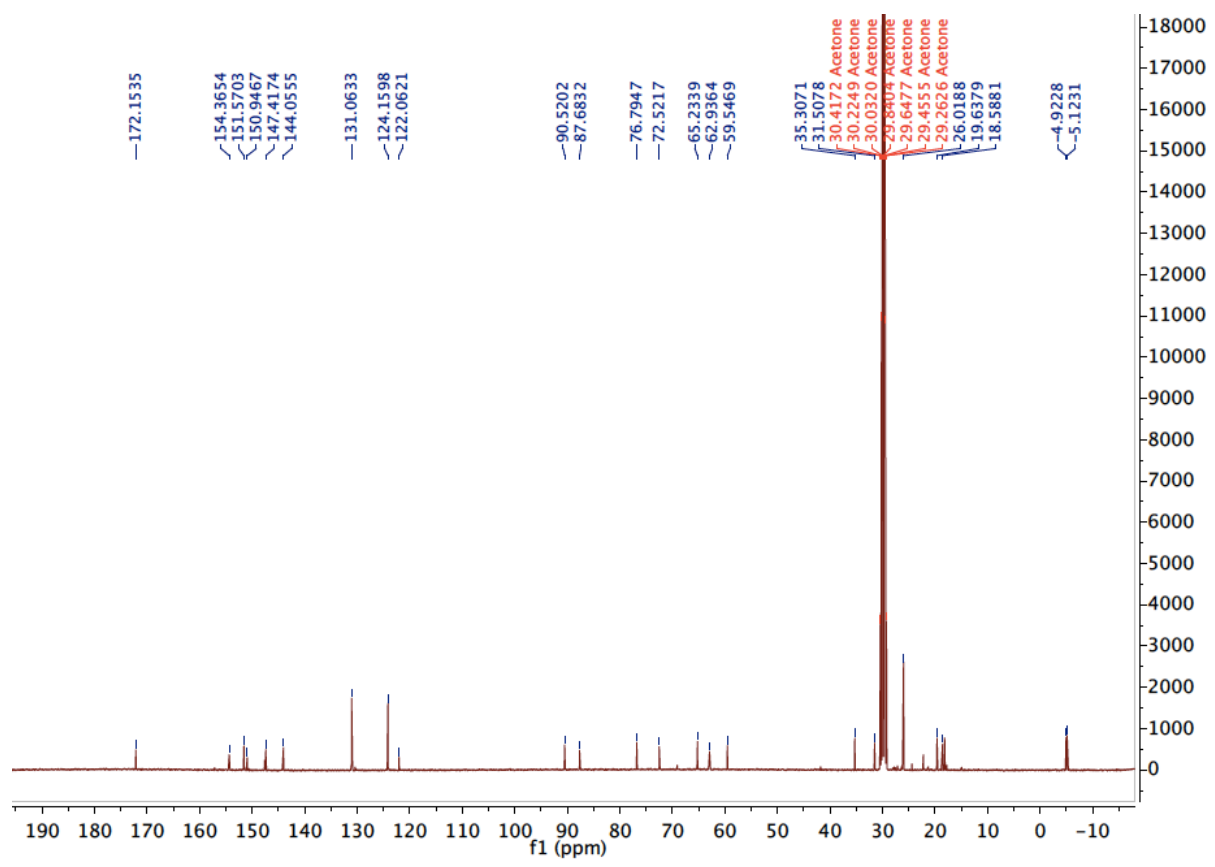

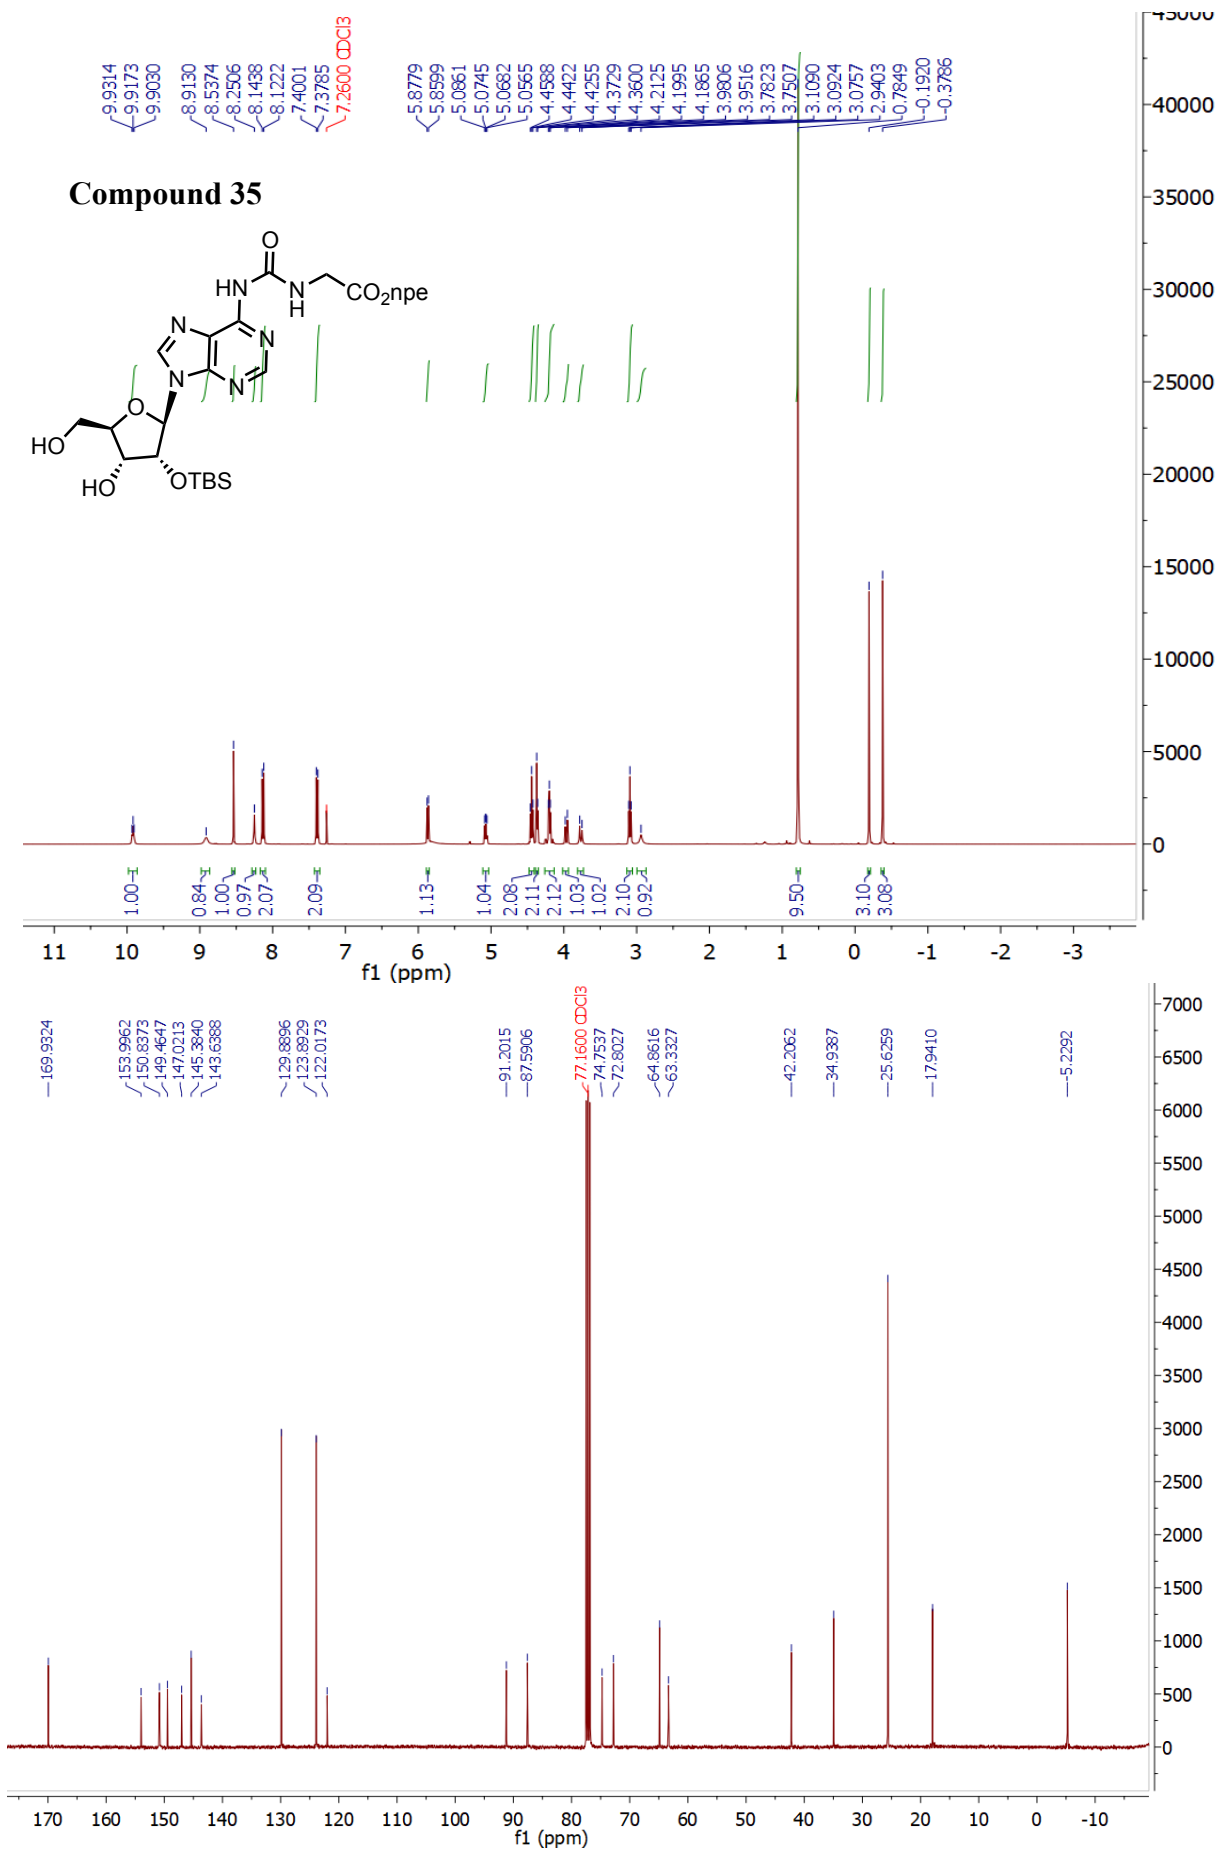

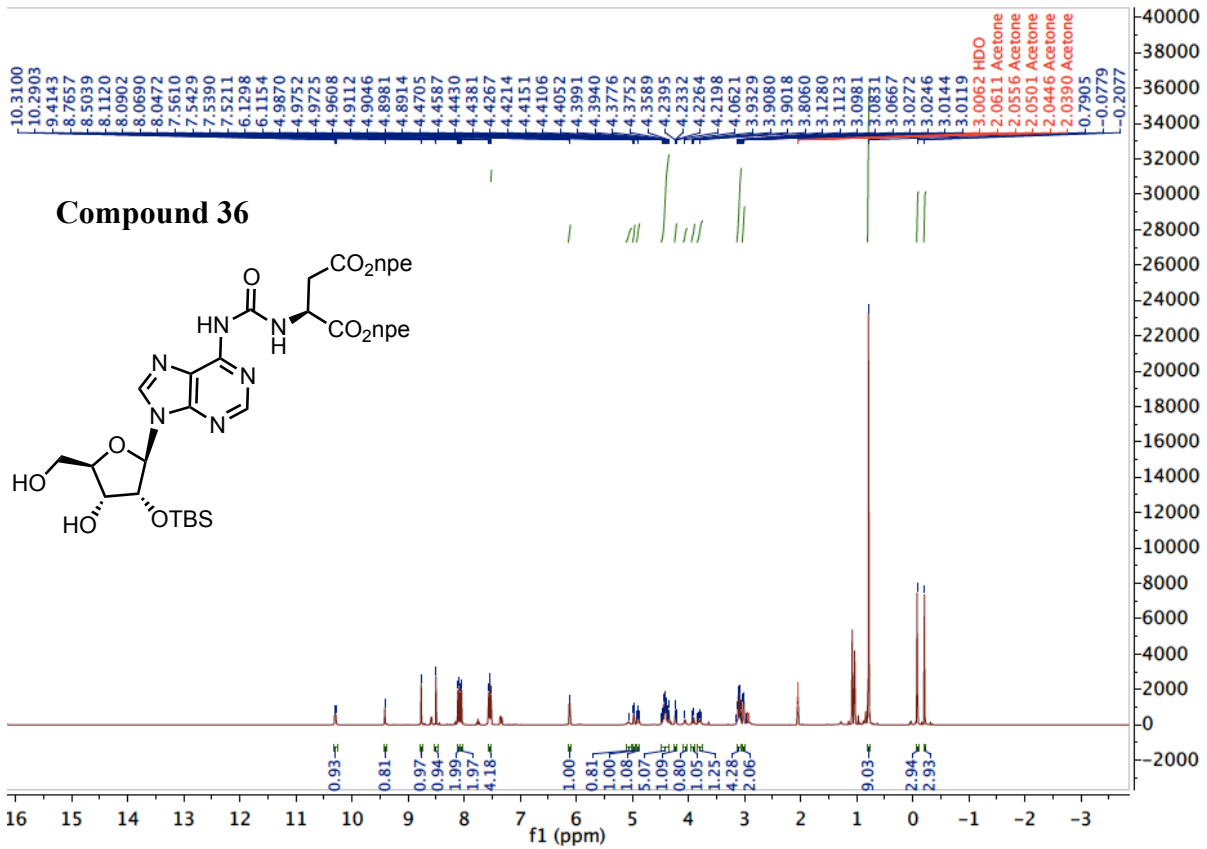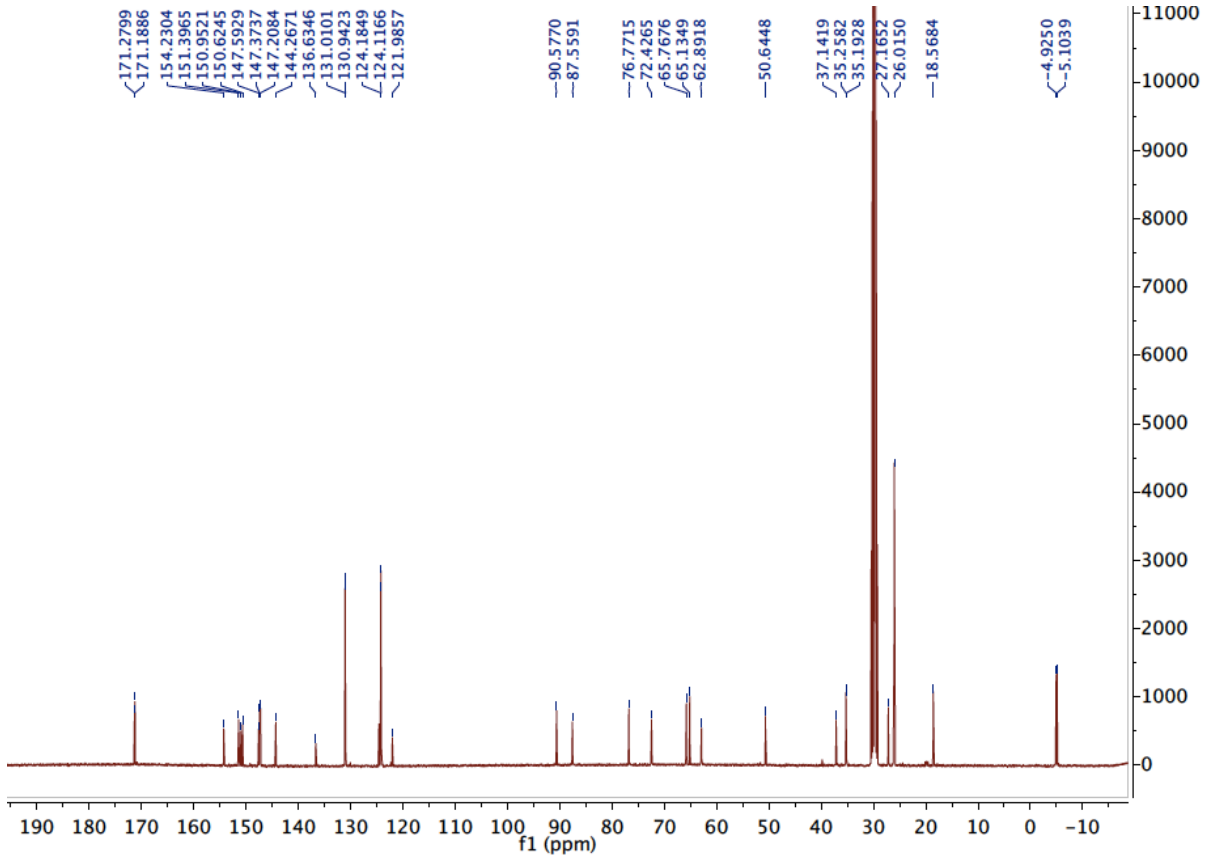

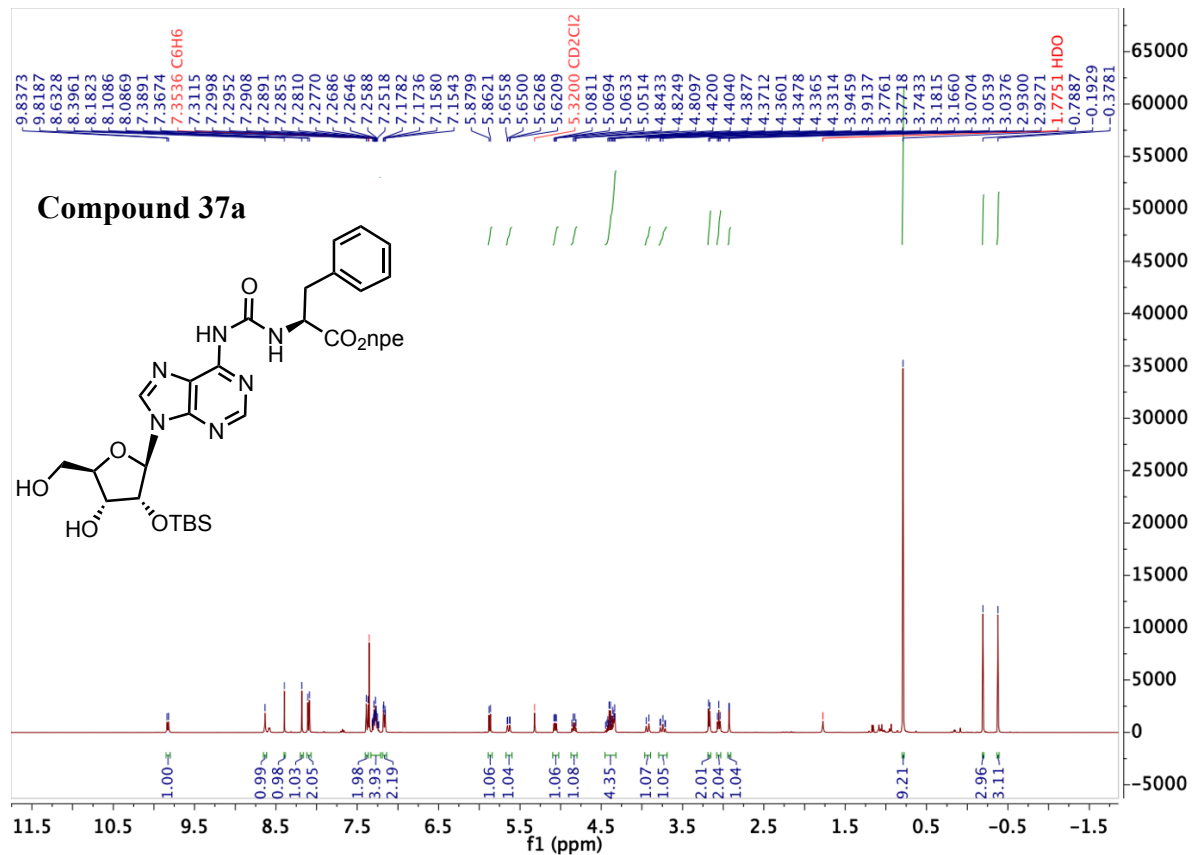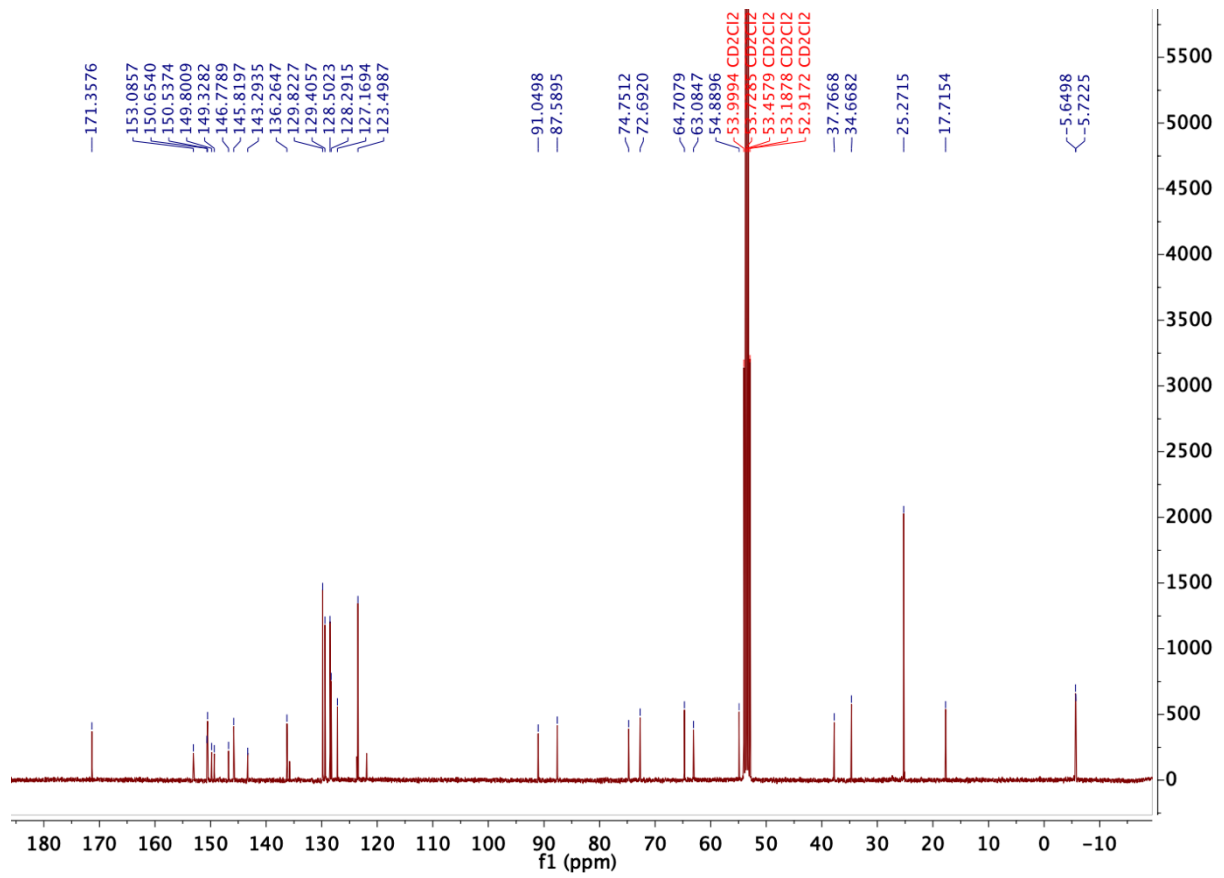

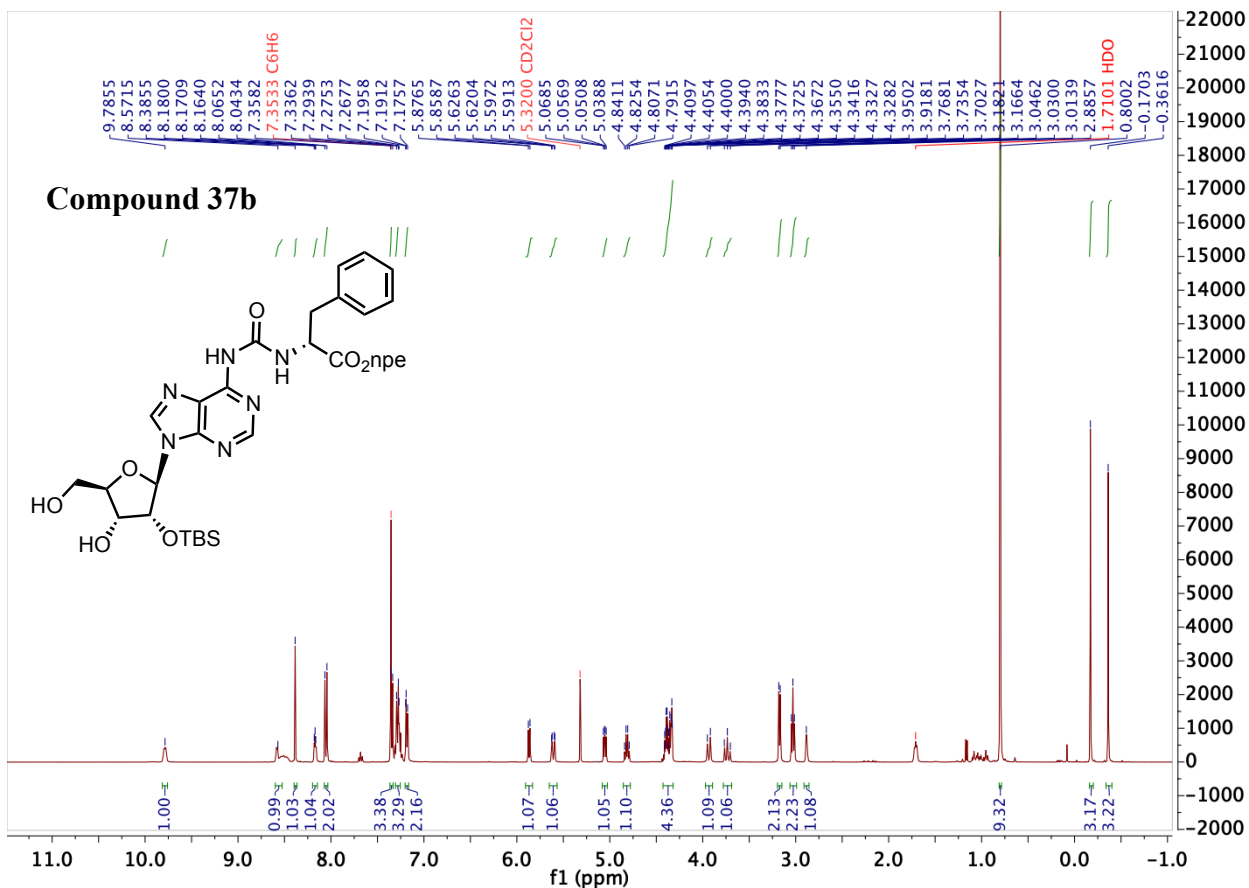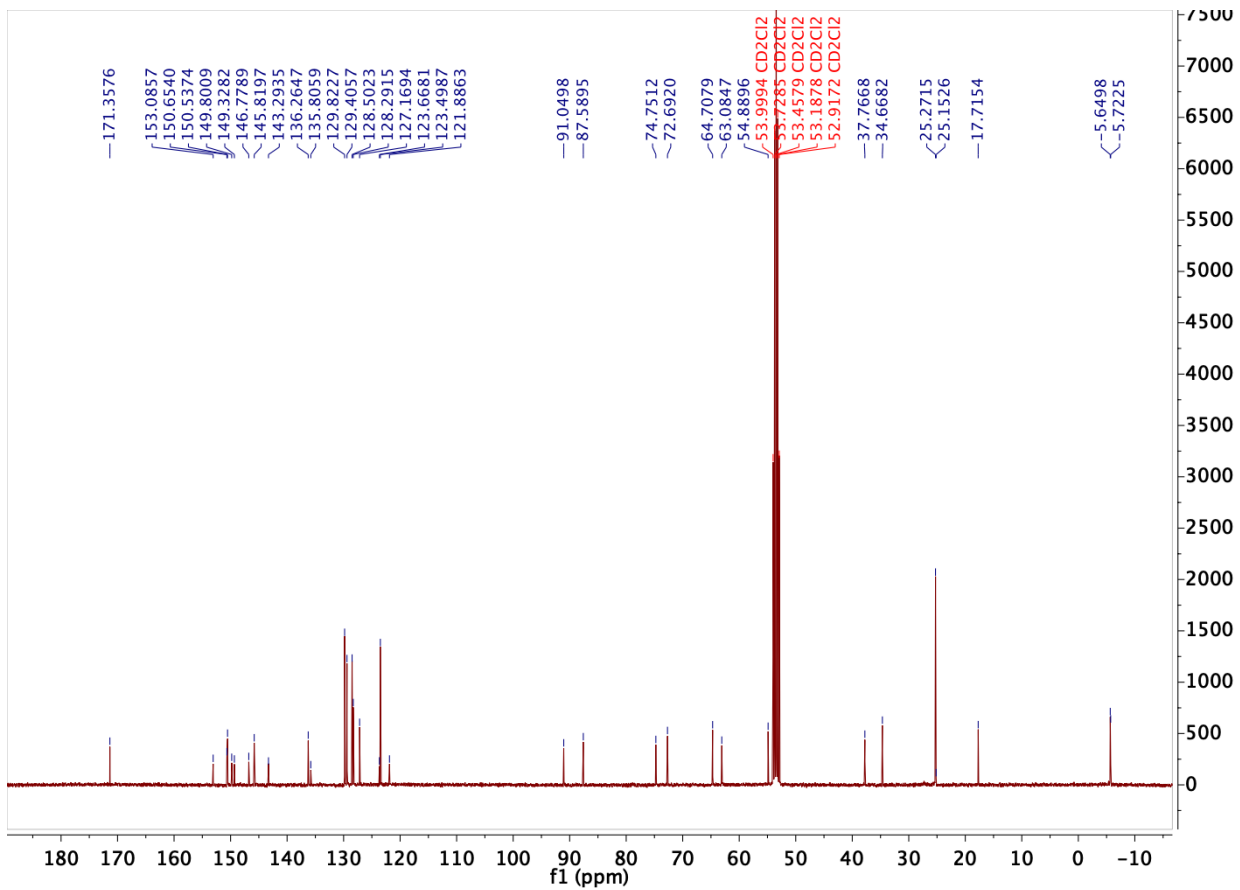



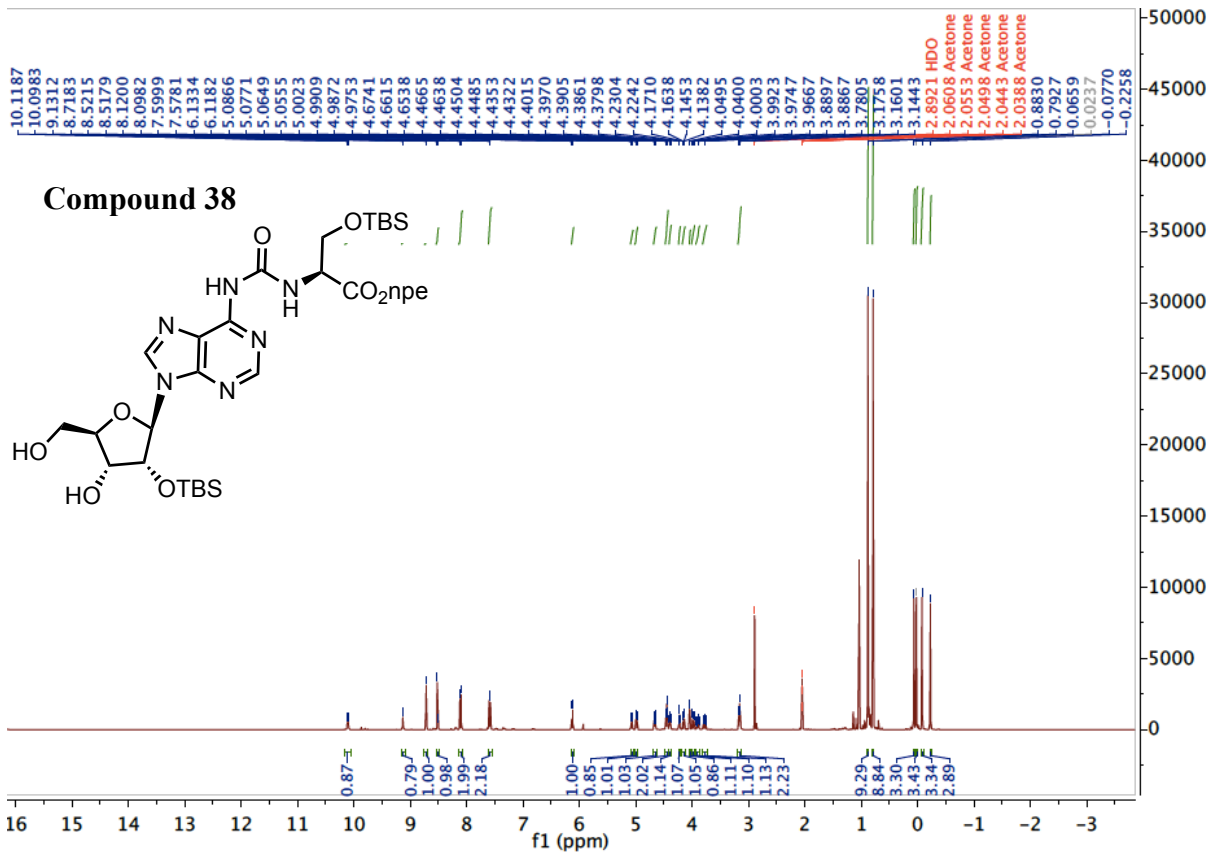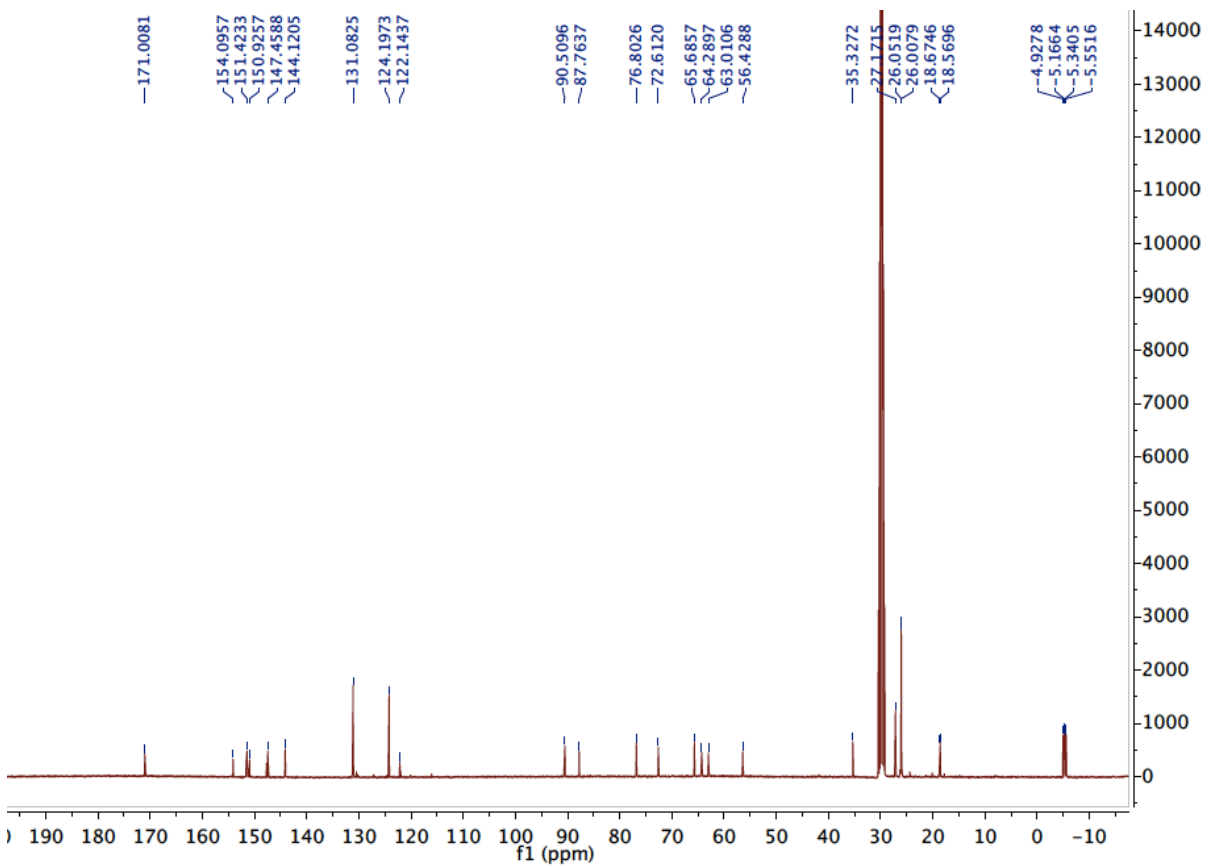

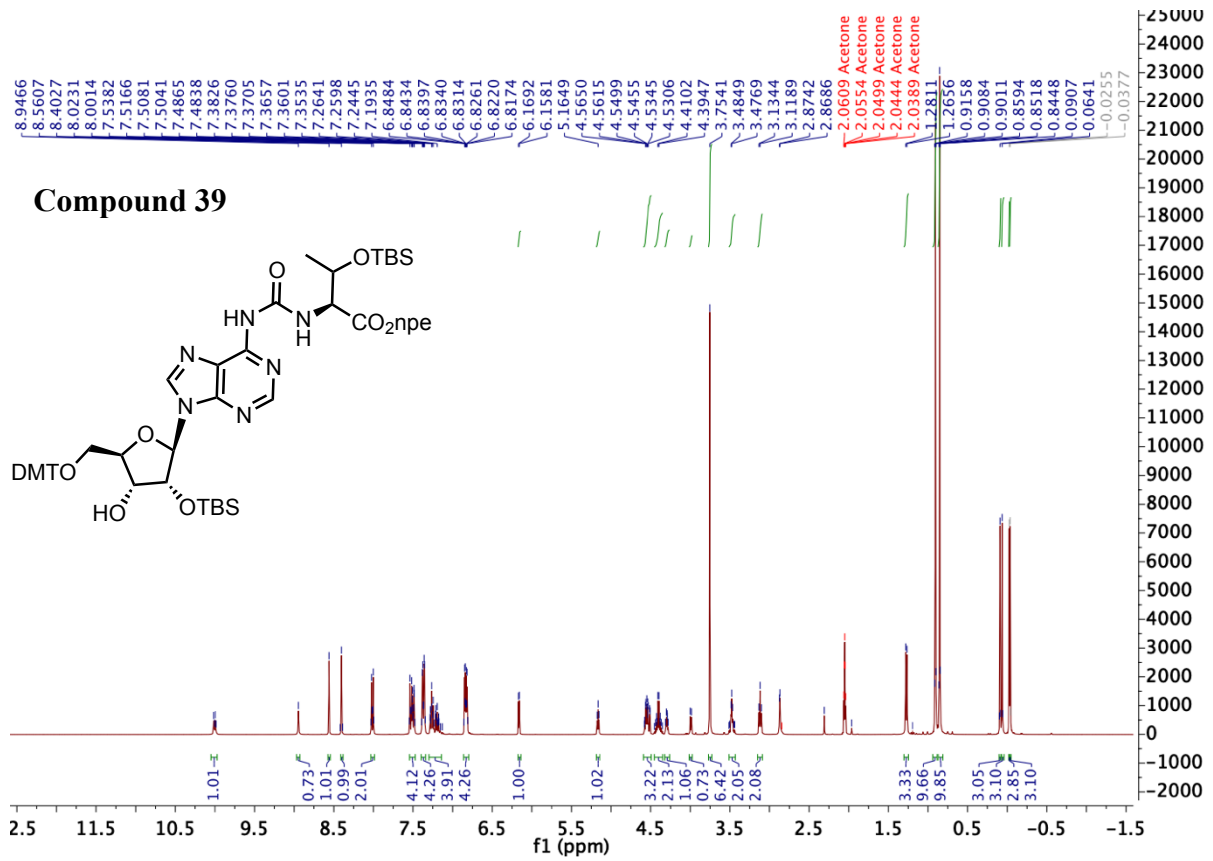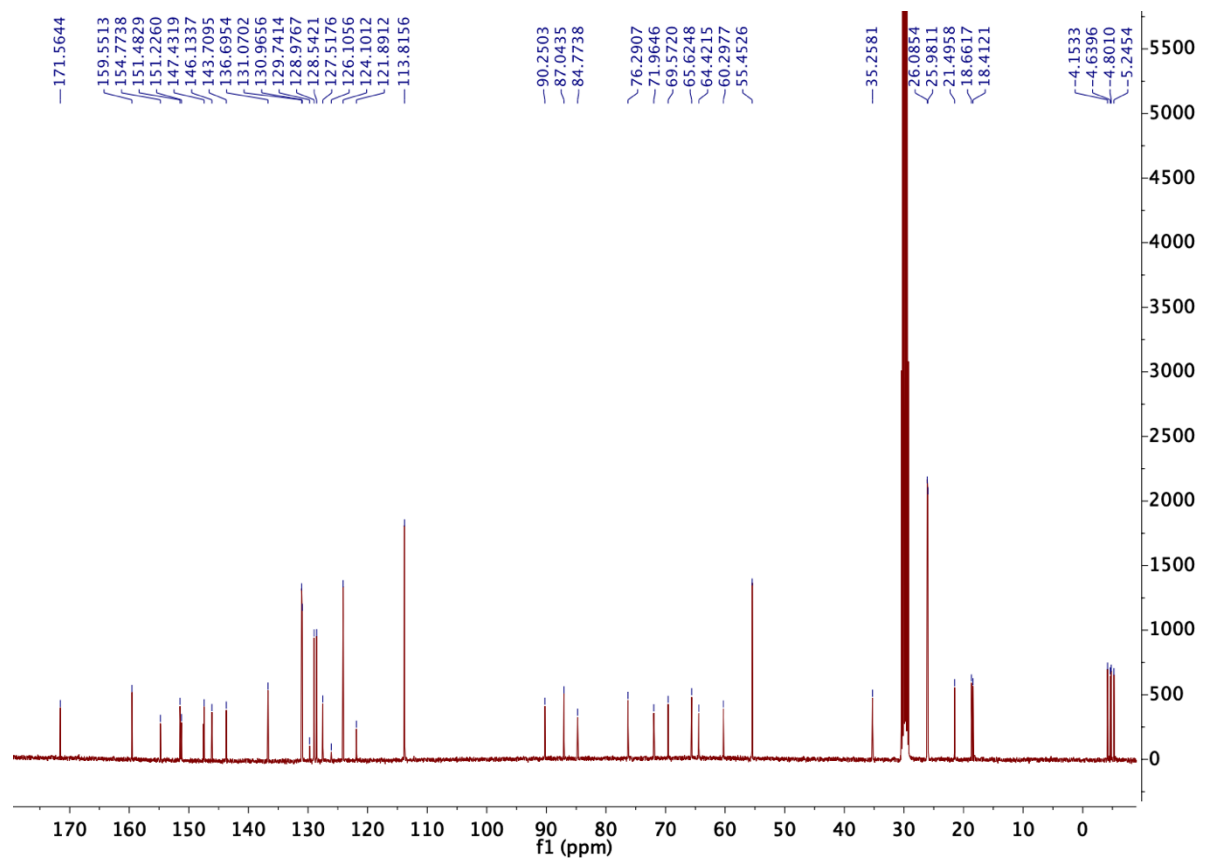

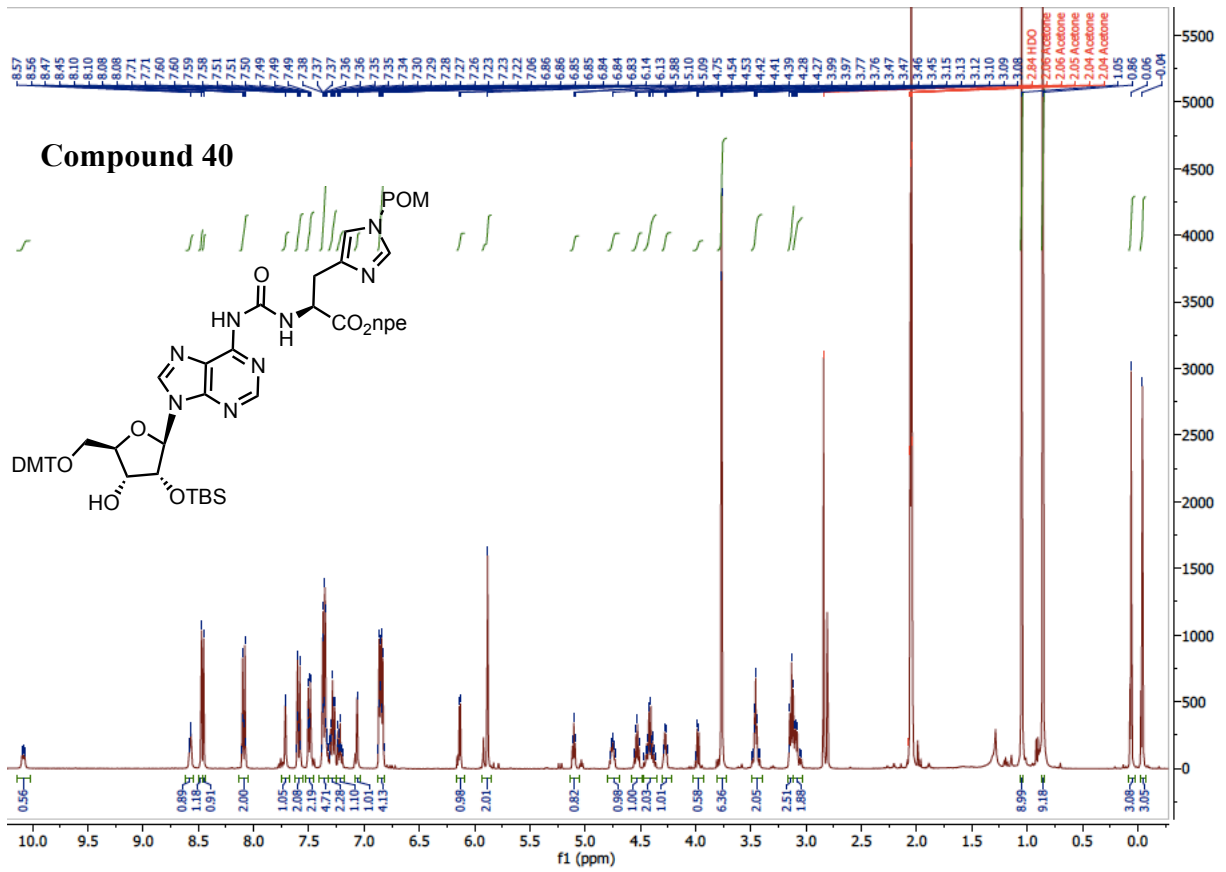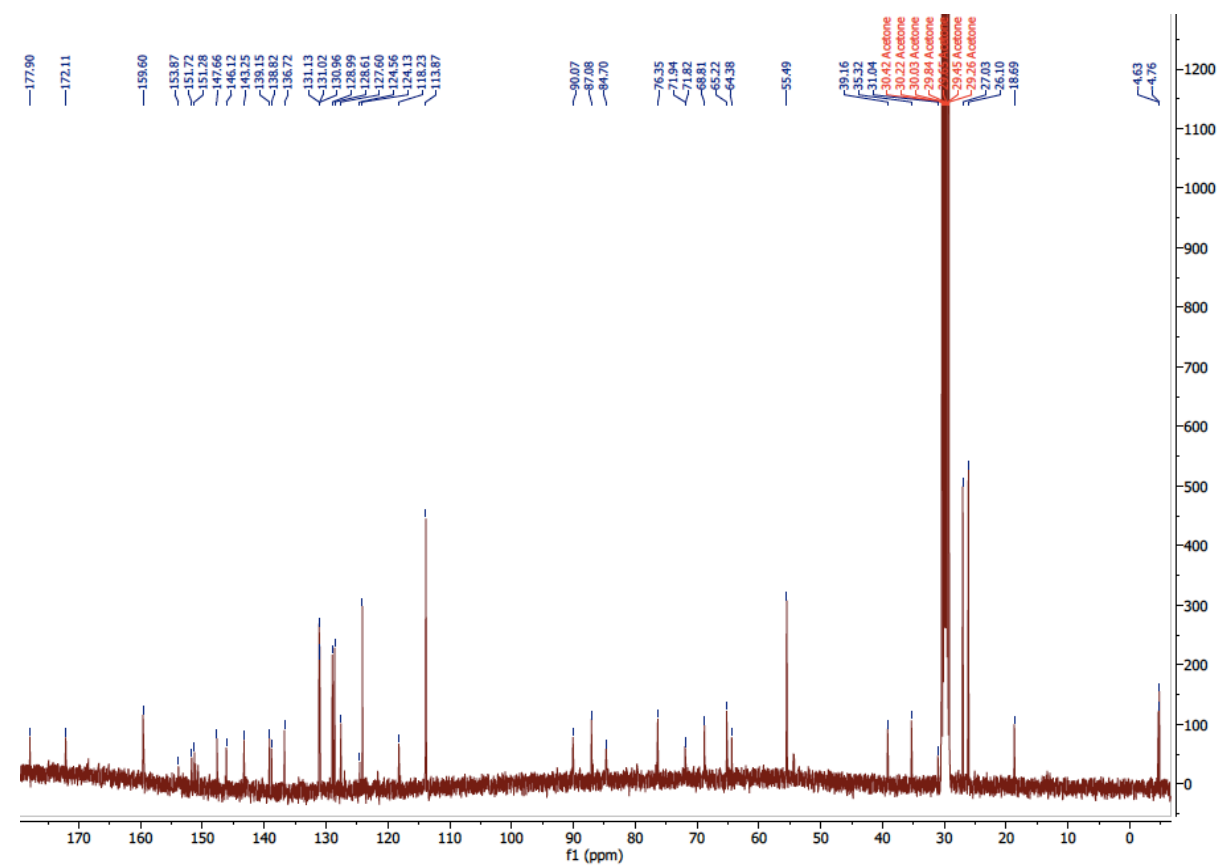

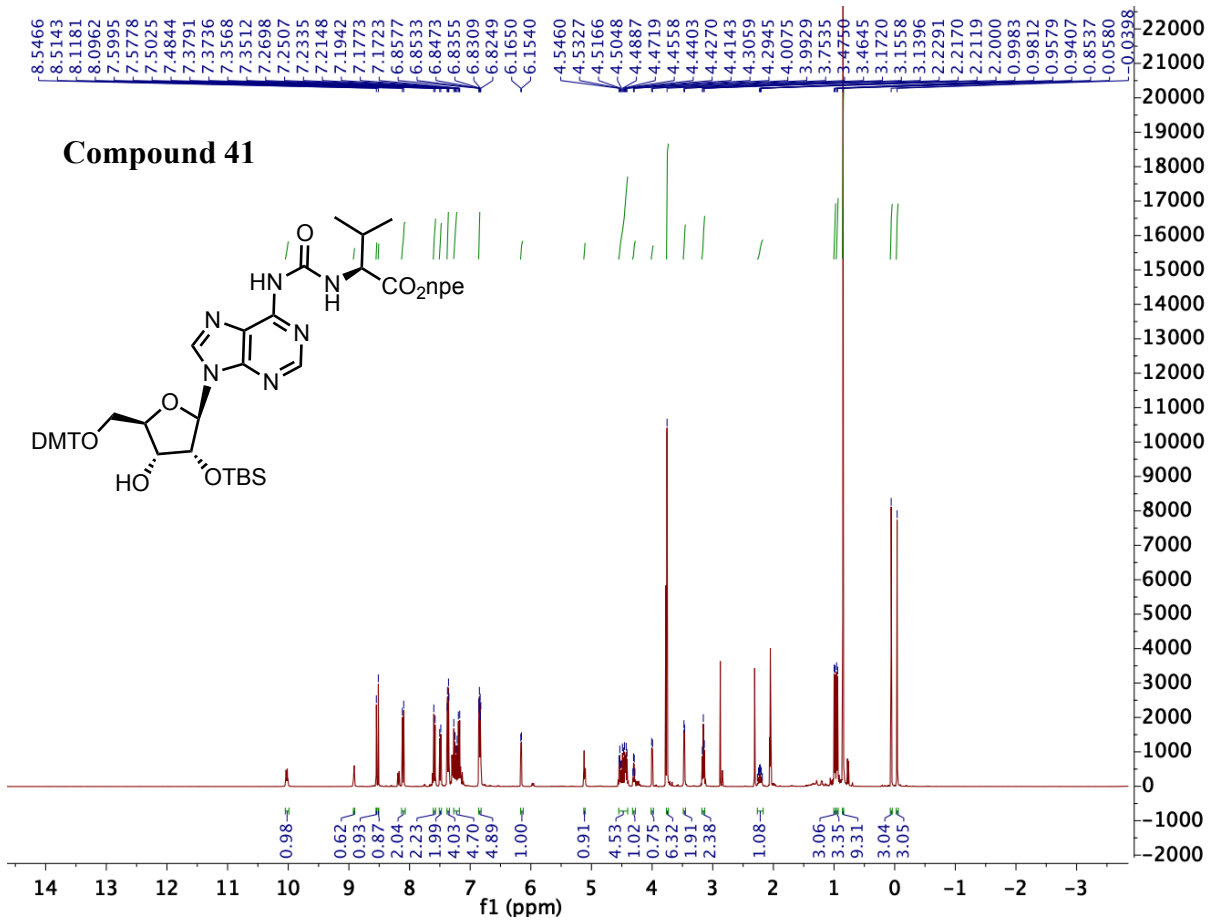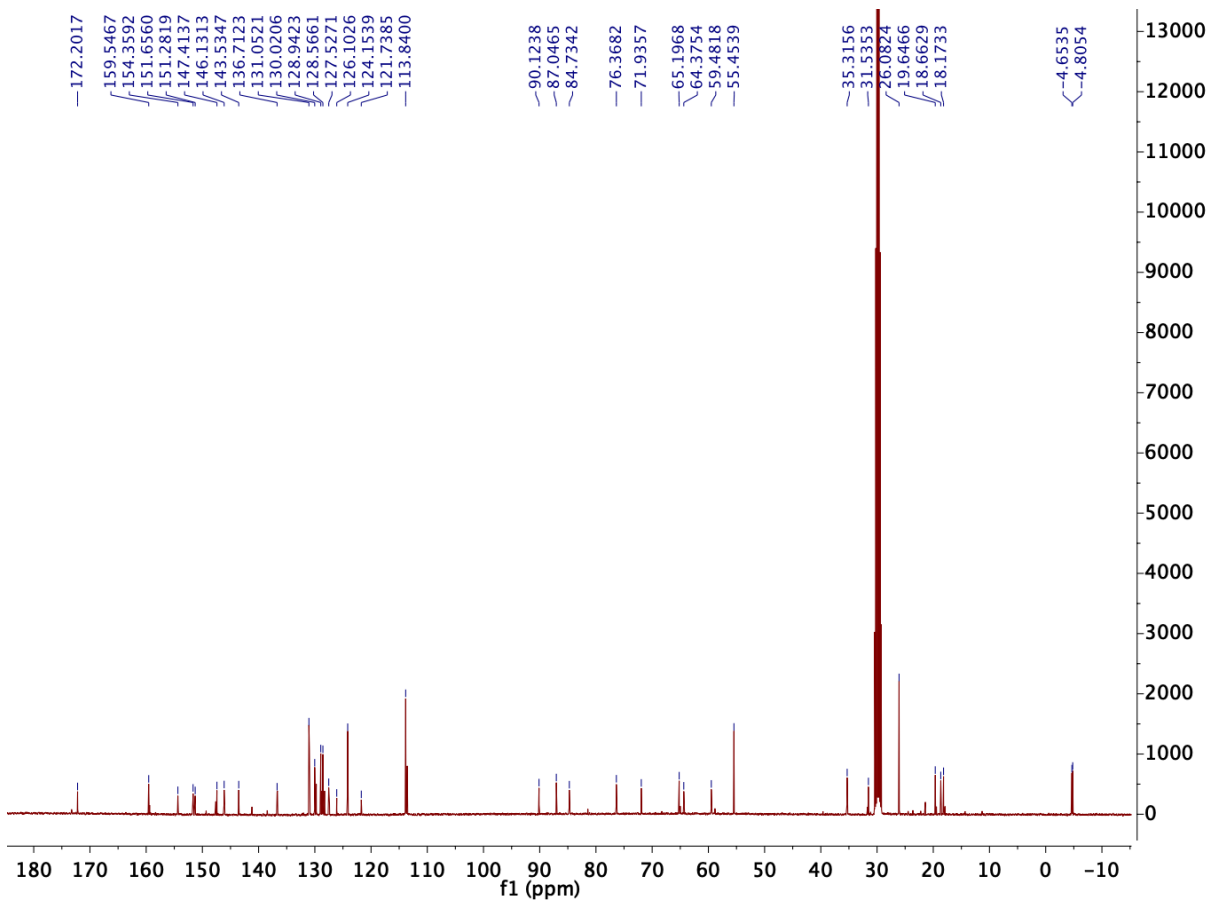

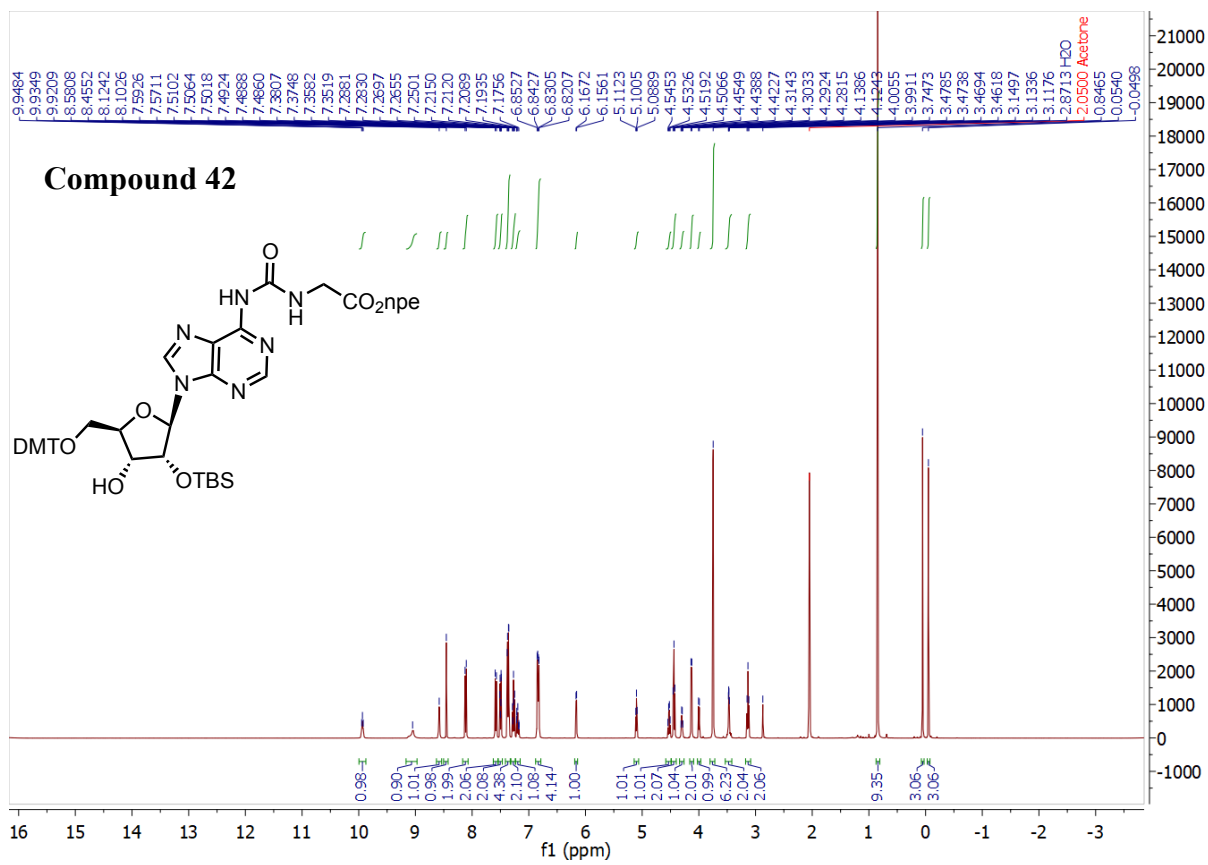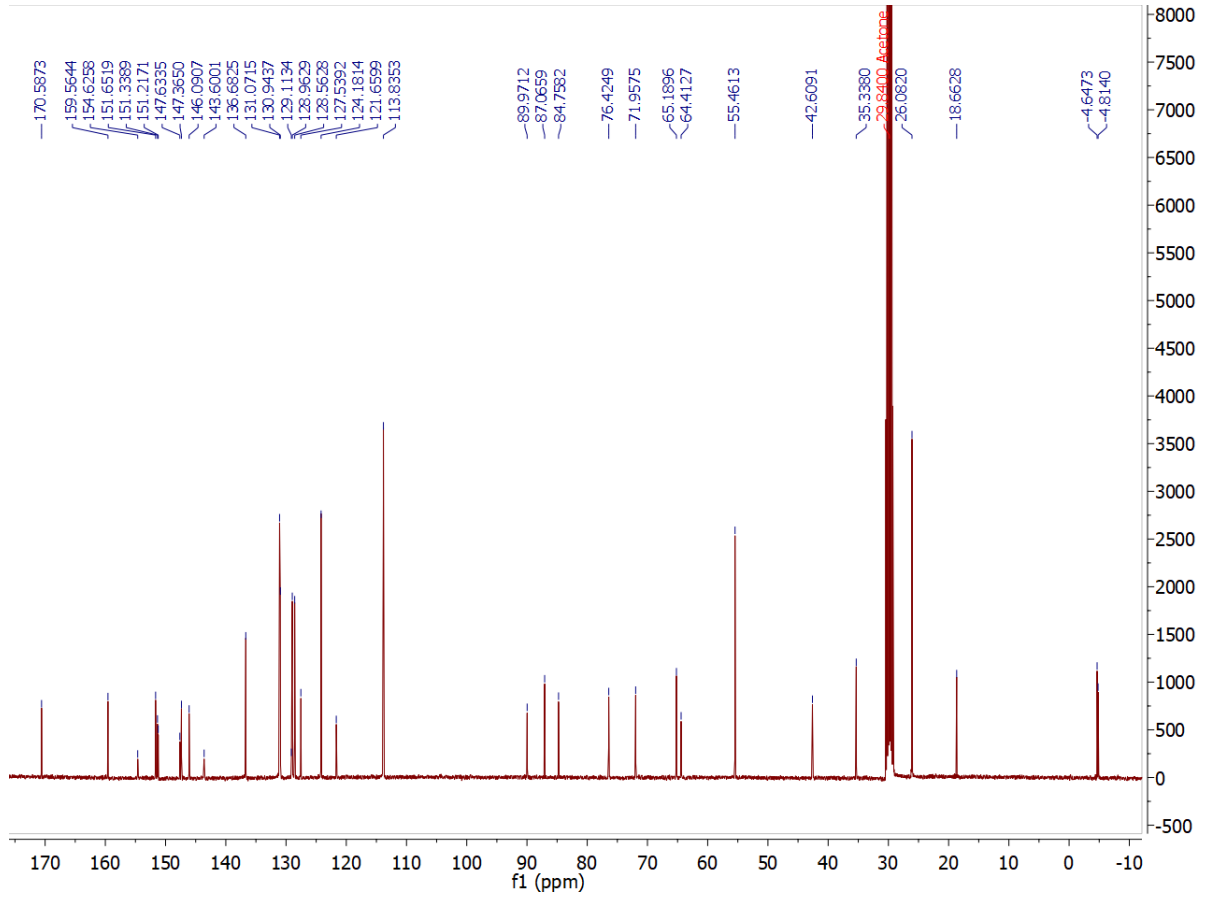

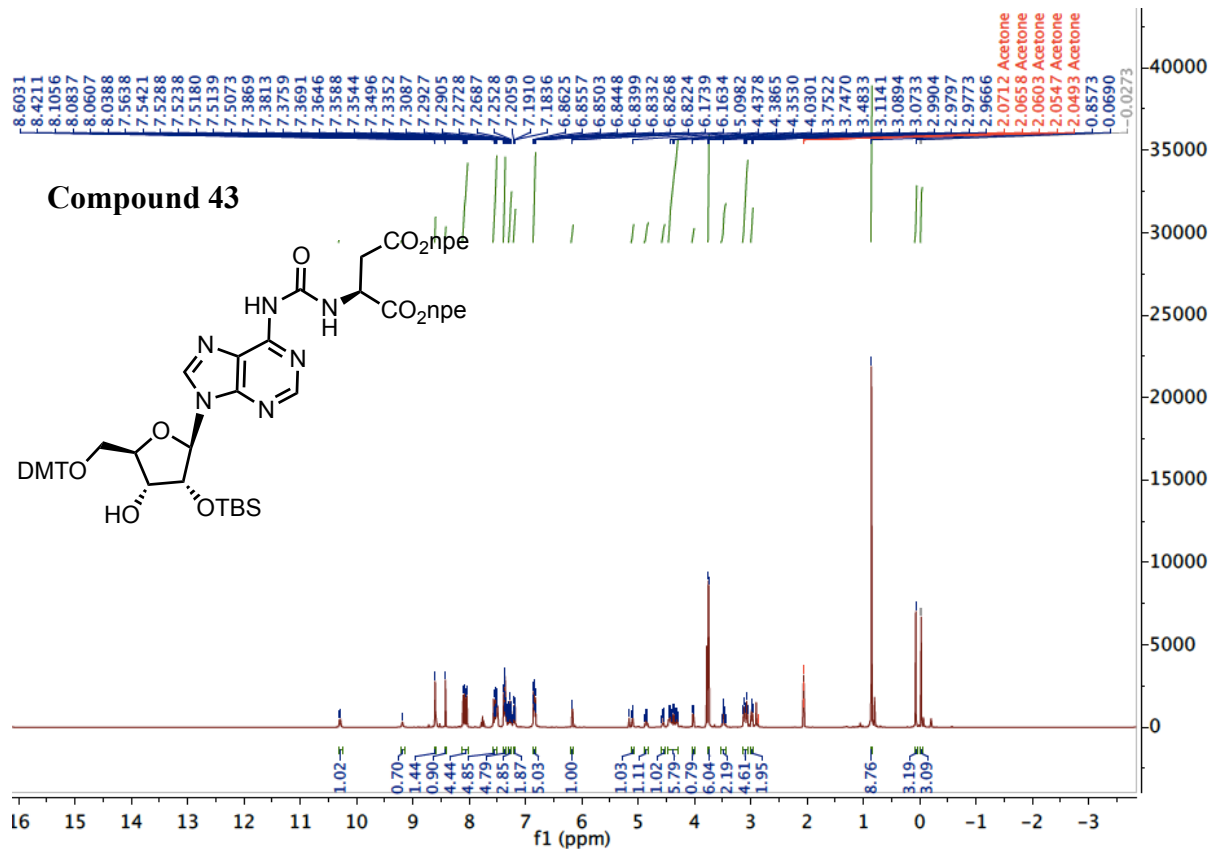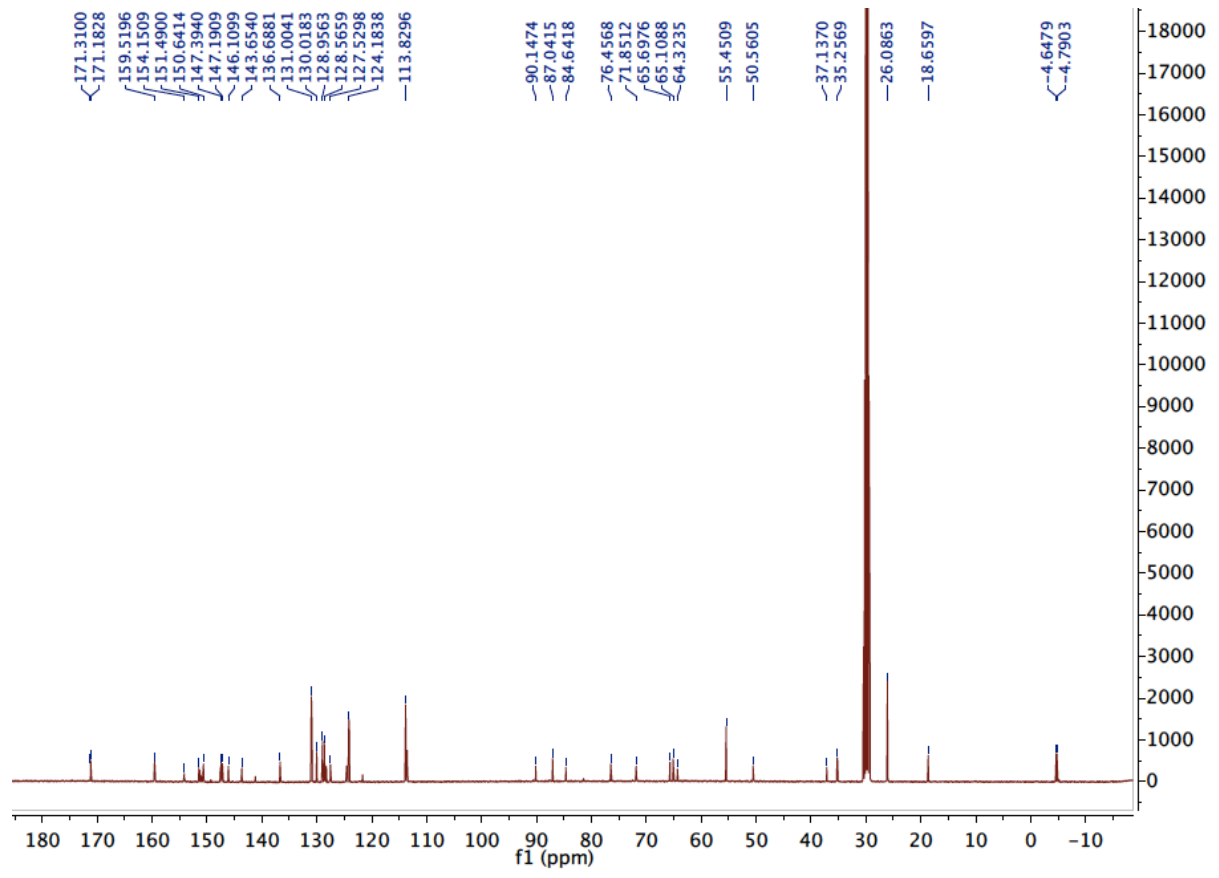

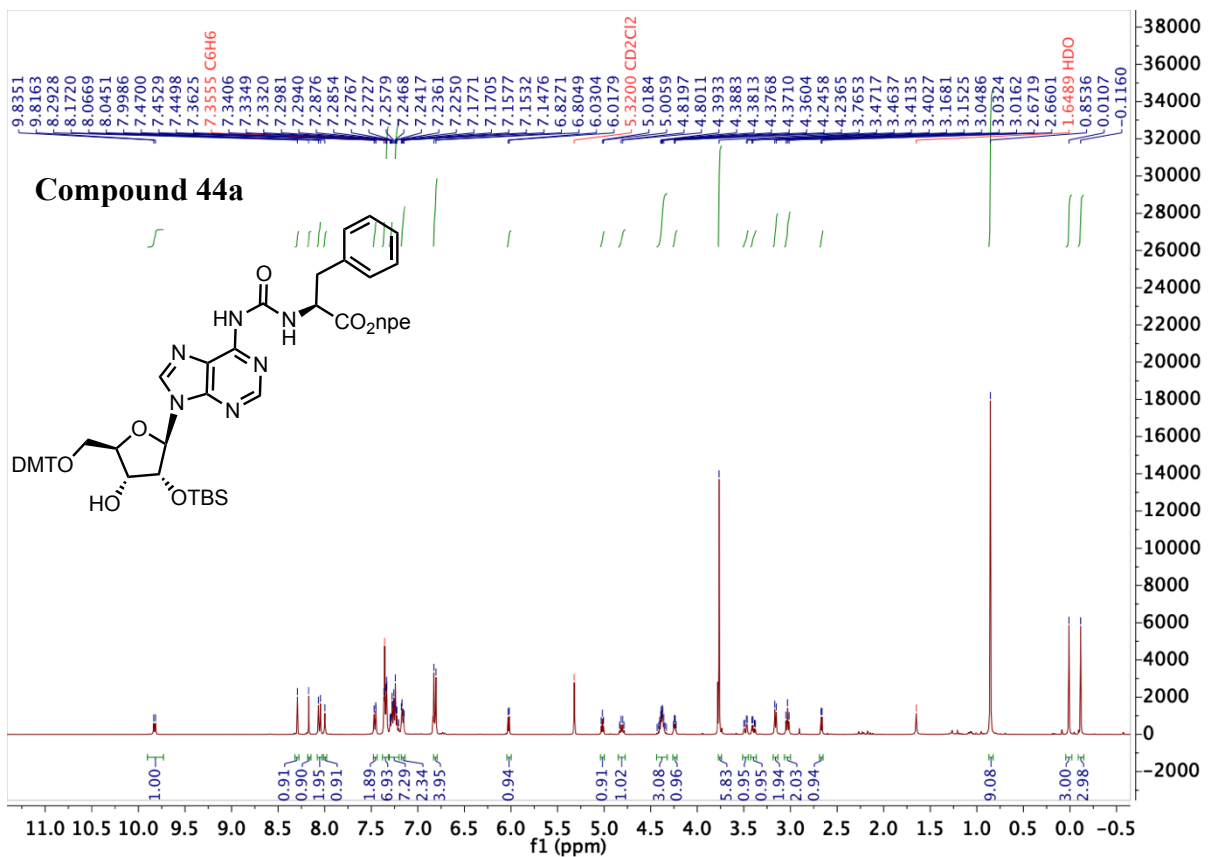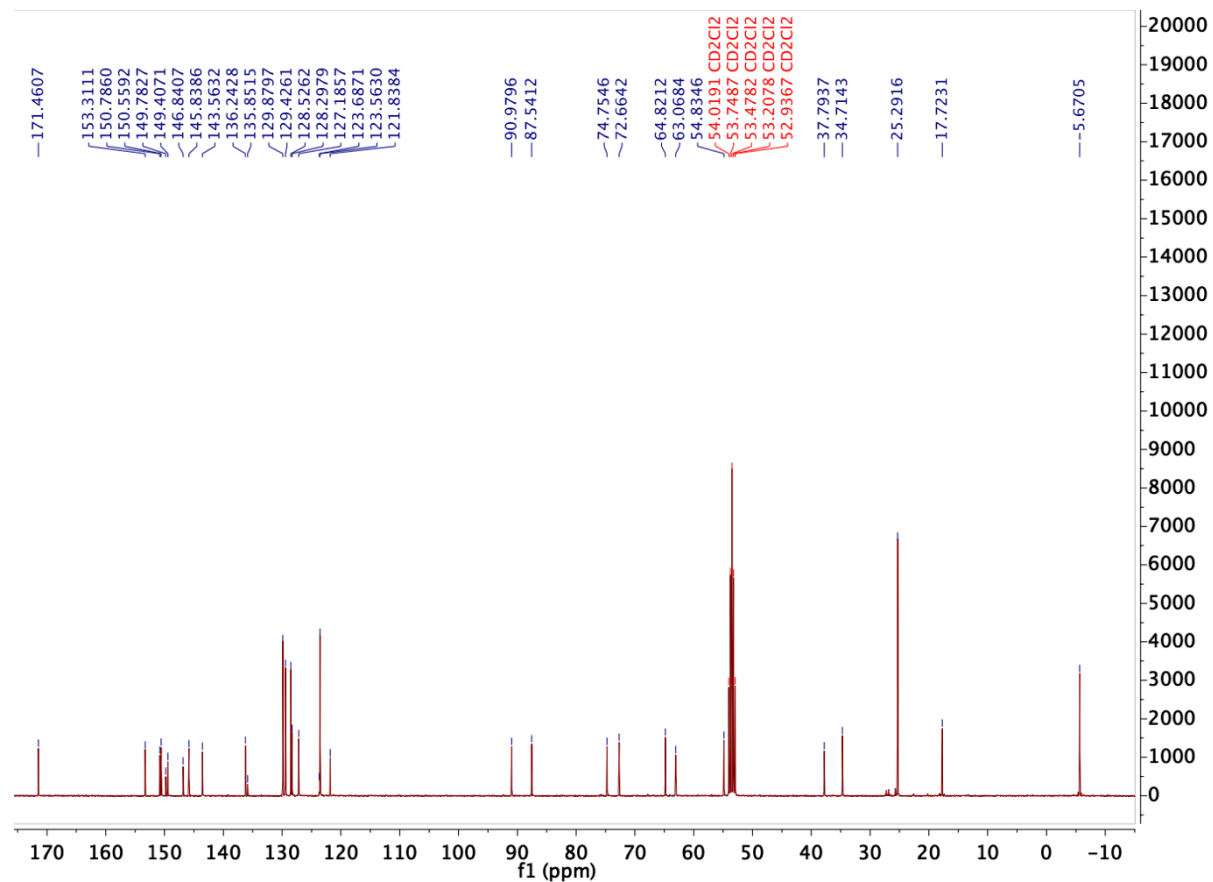

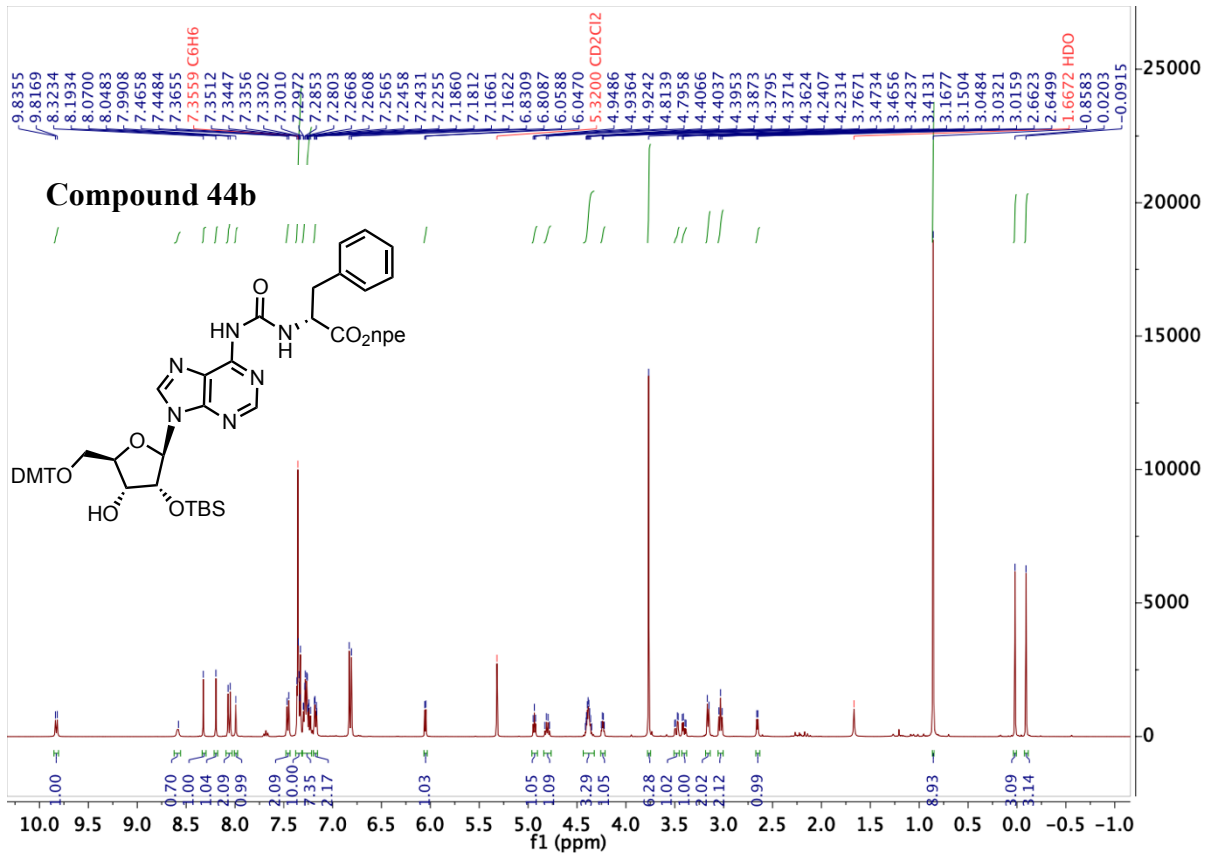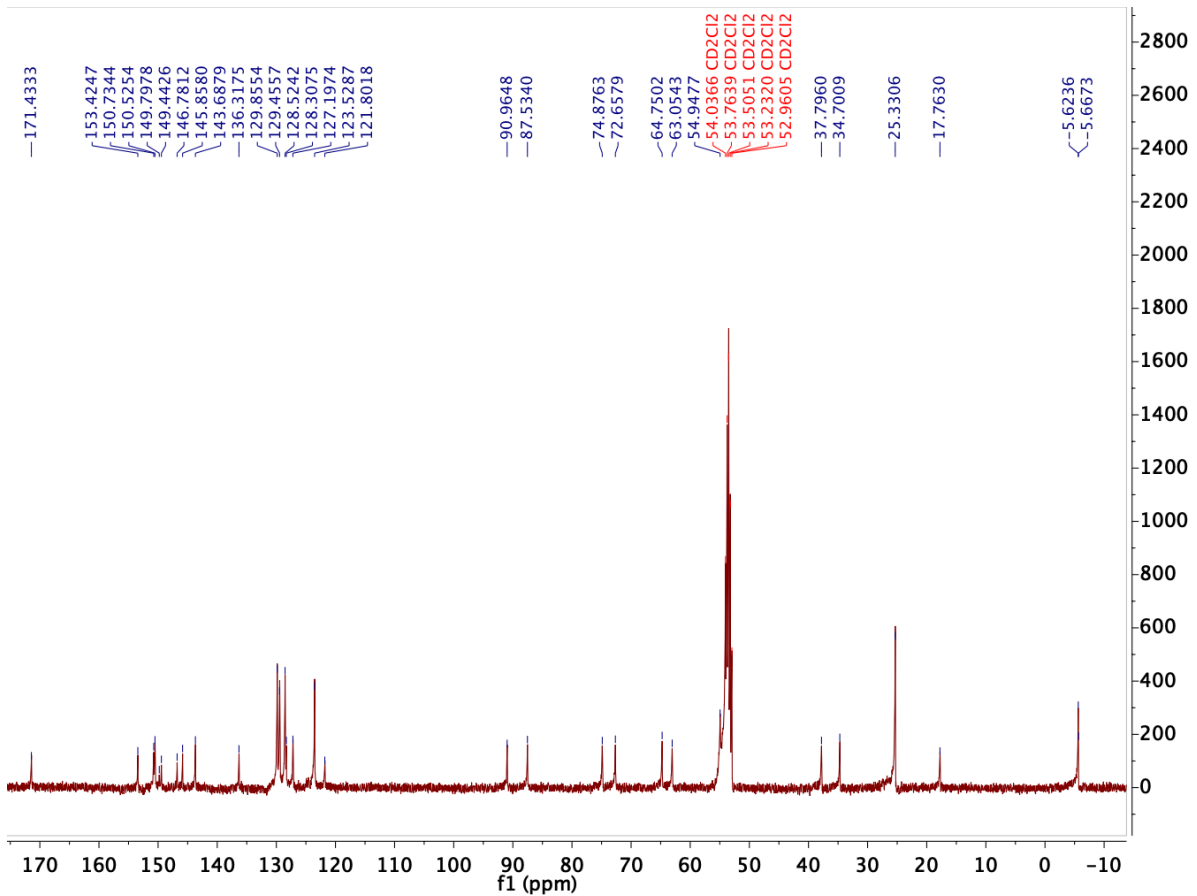



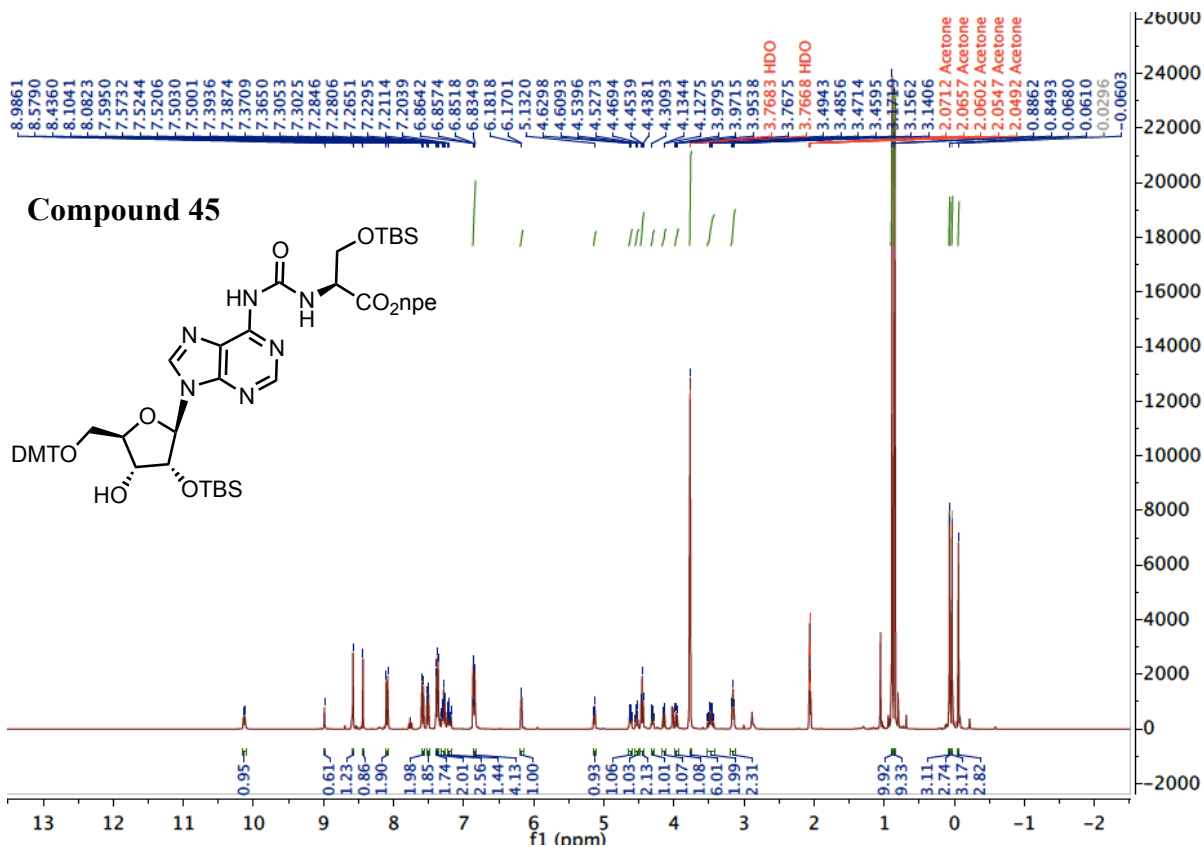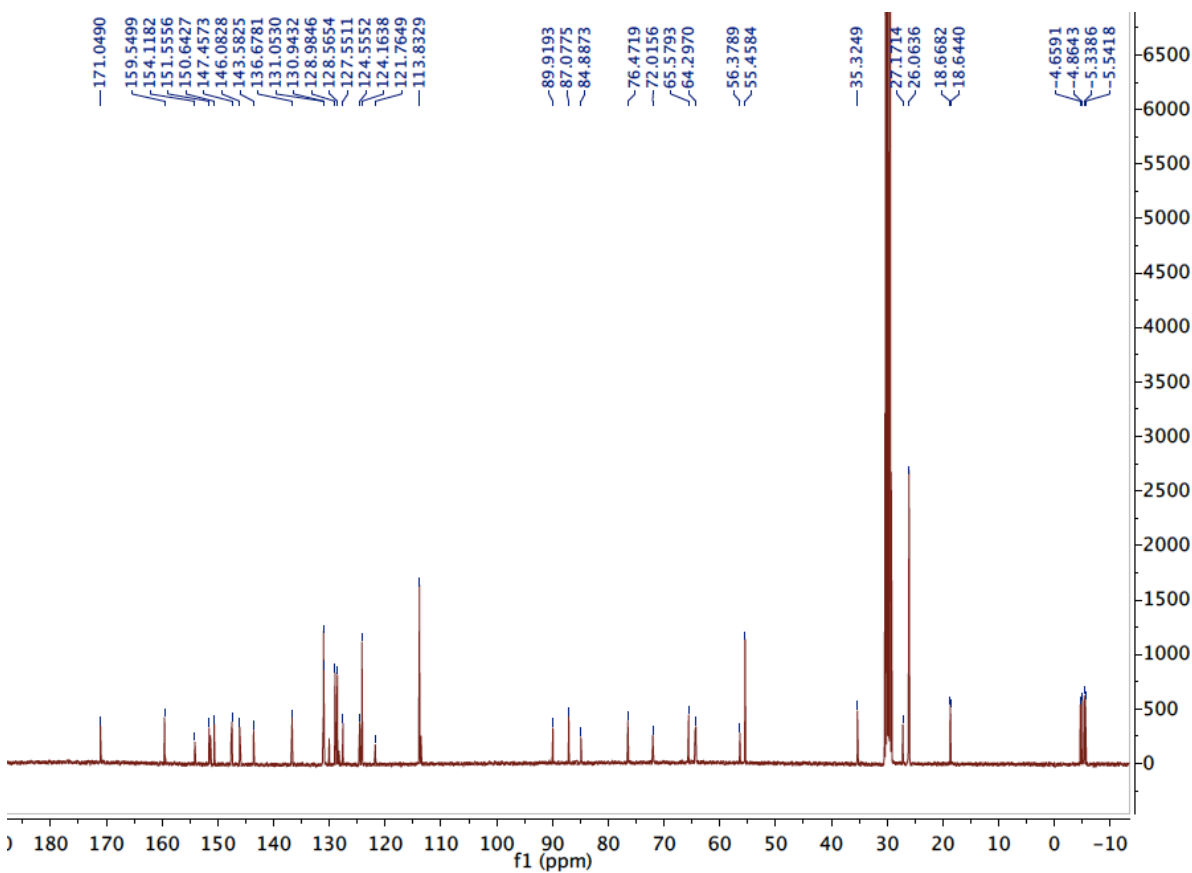

### Compound 46

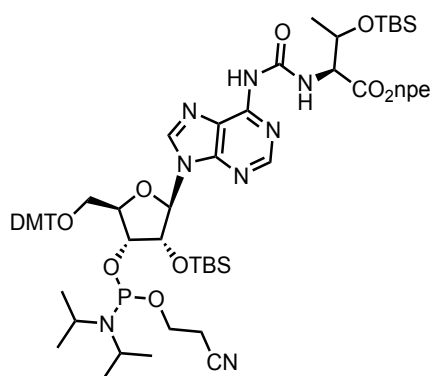

150.1589  
148.4478

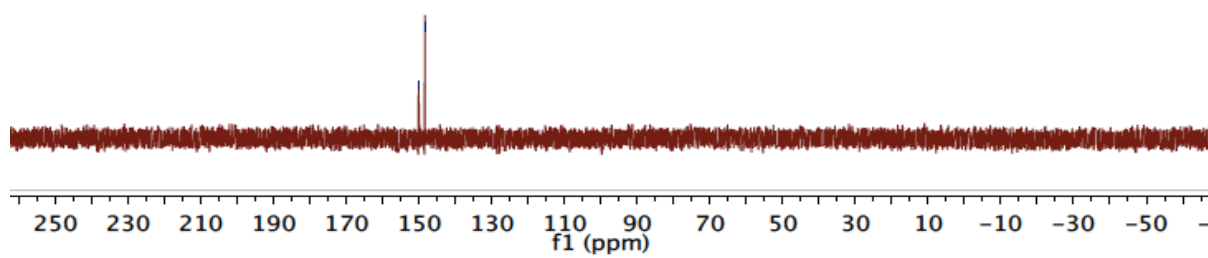

### Compound 47

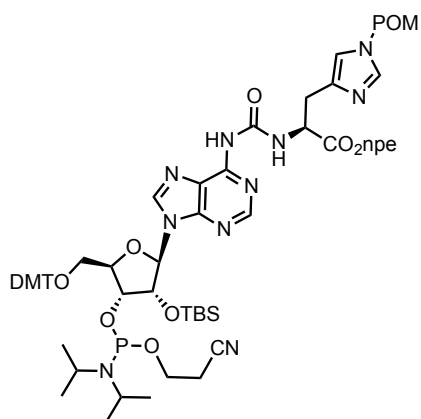

150.27  
148.61

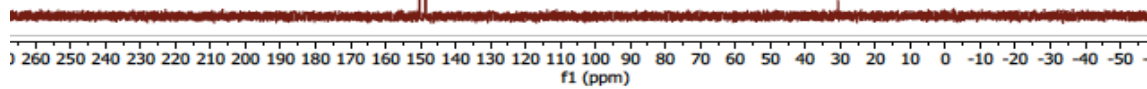

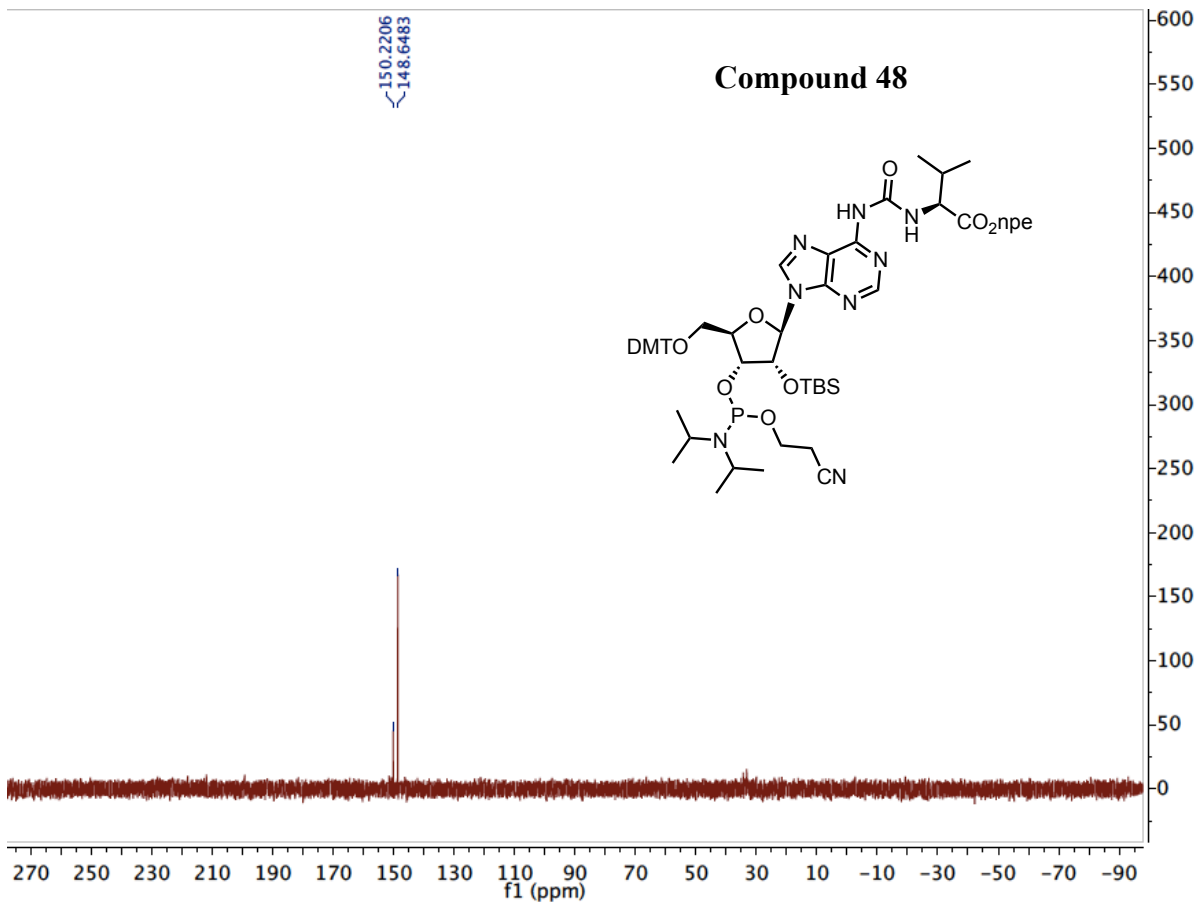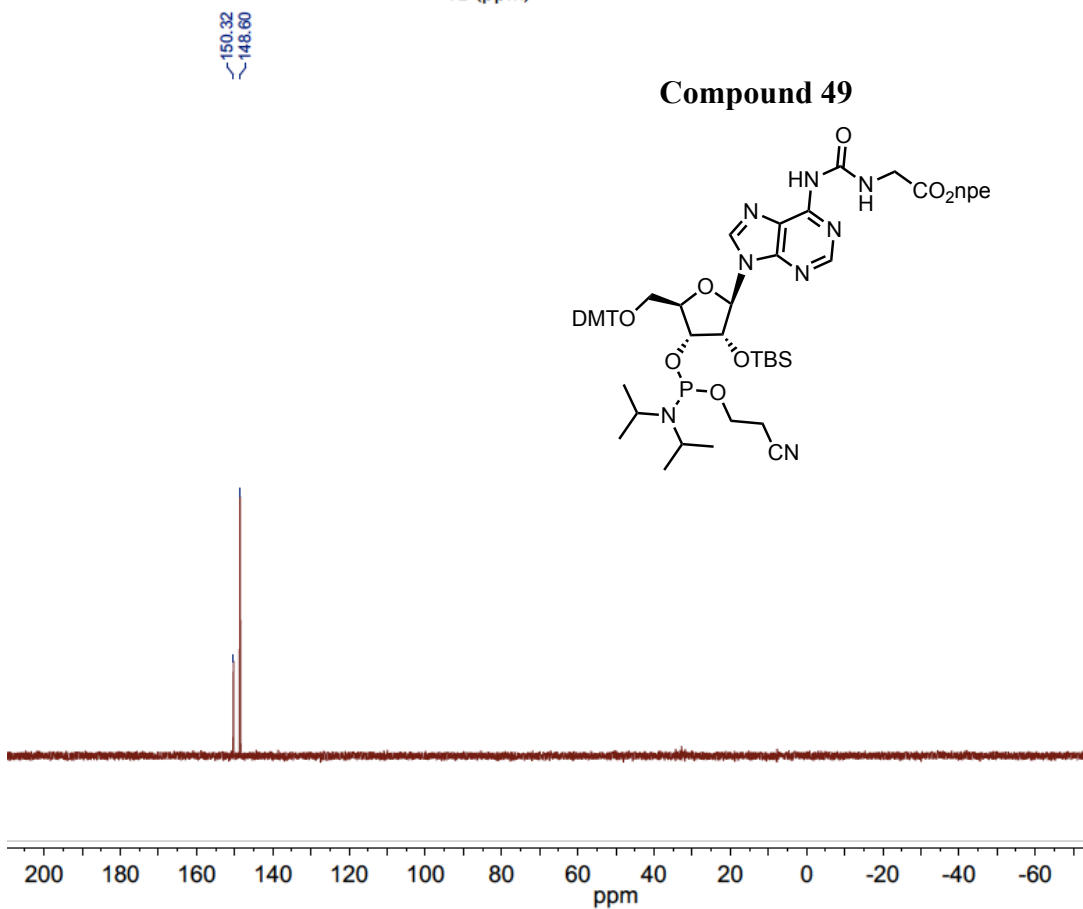

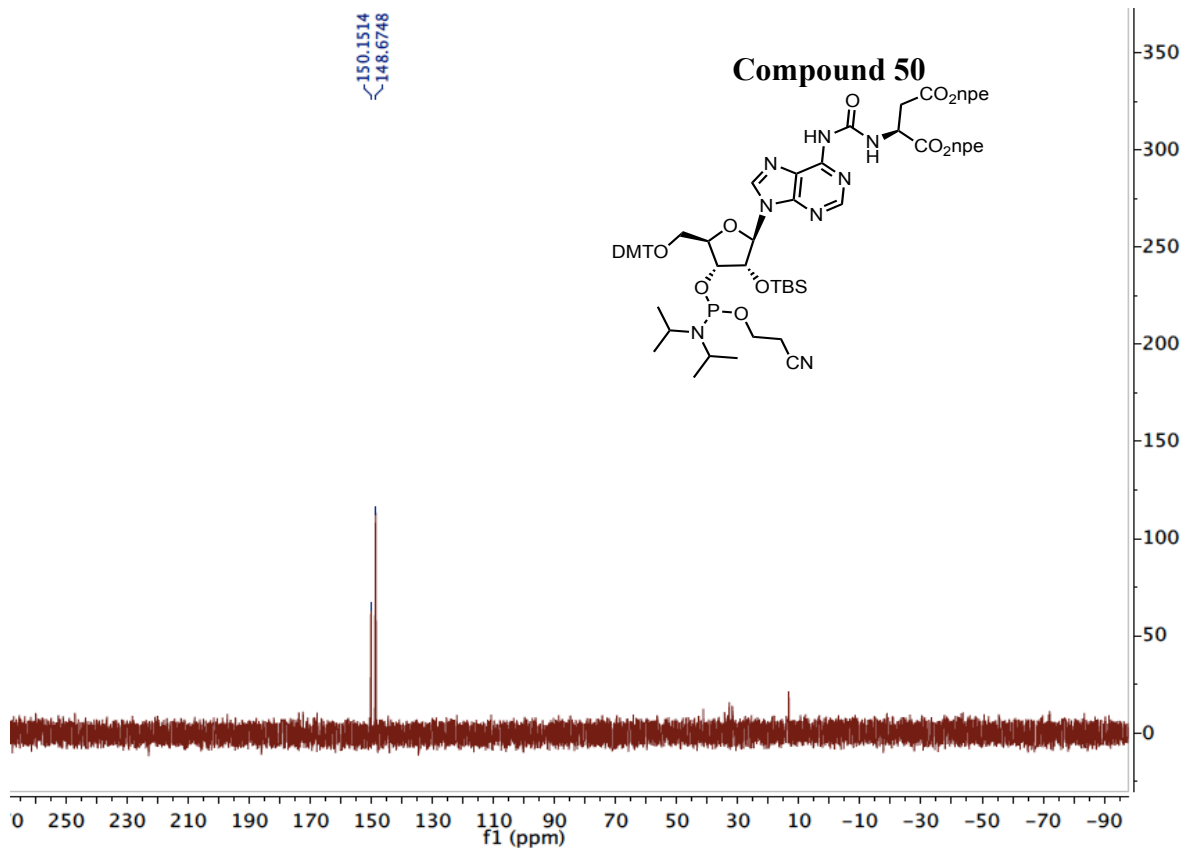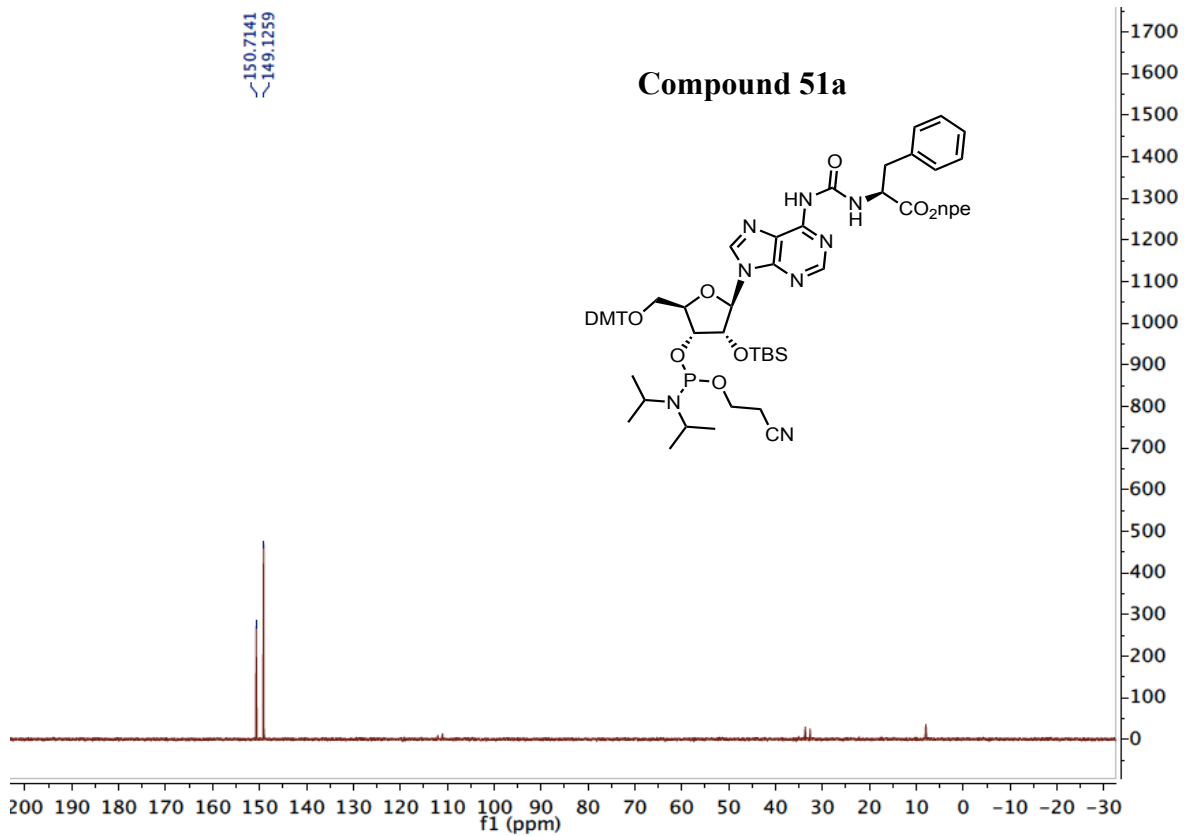

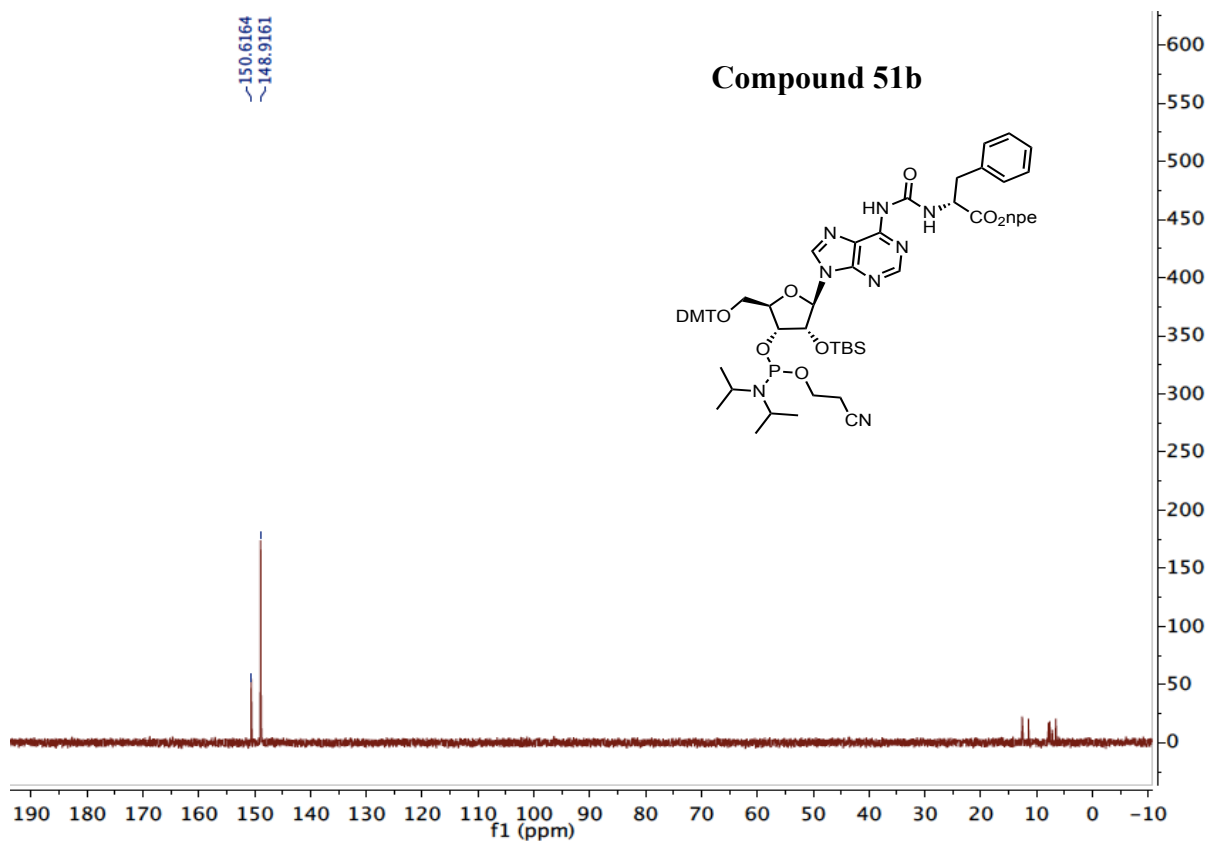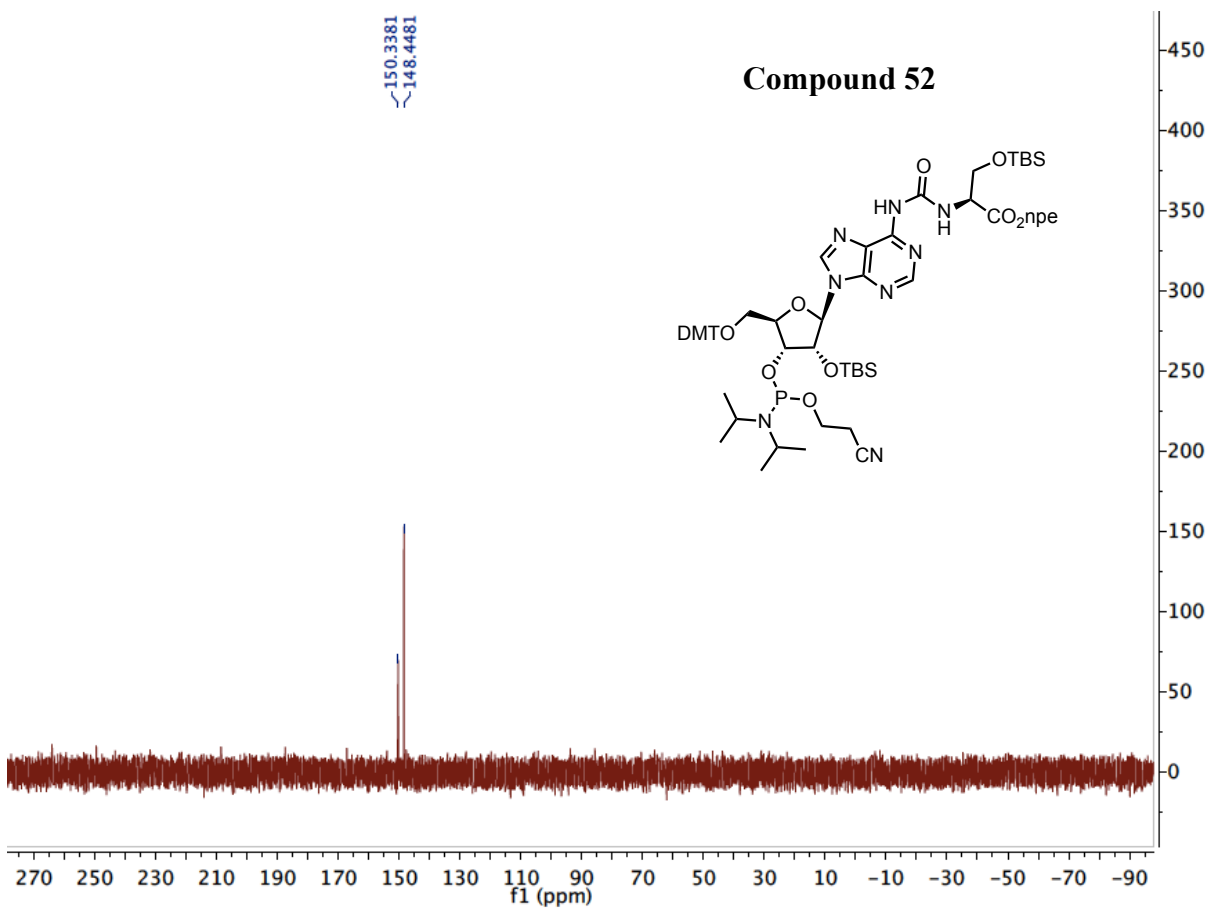

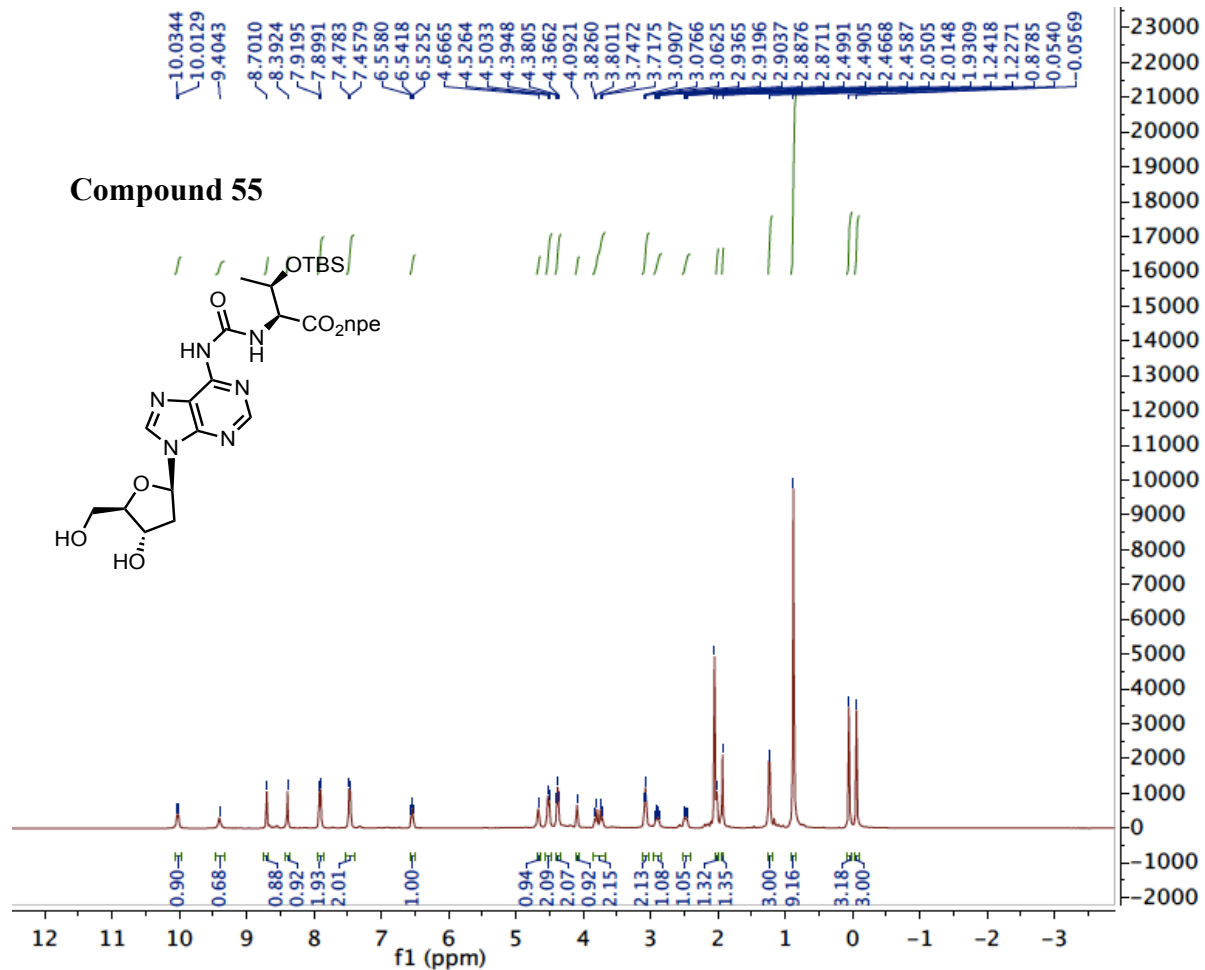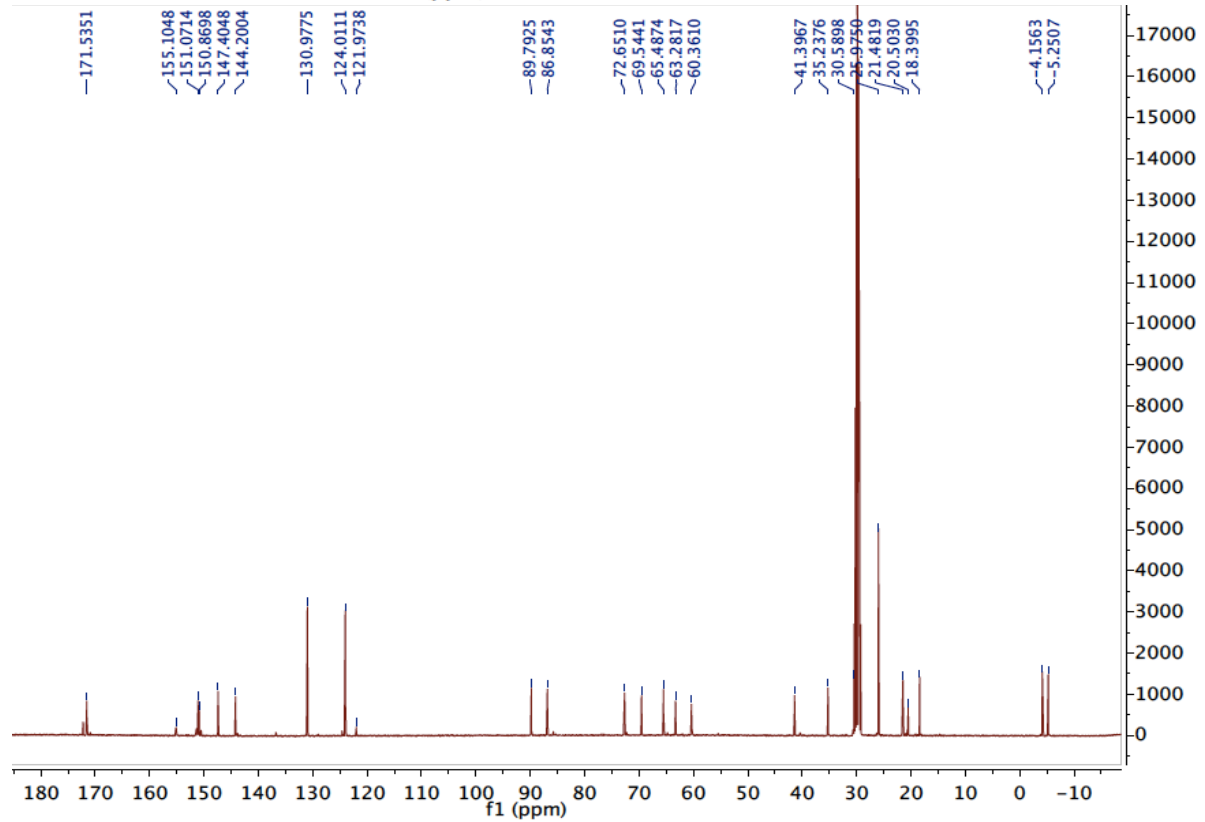

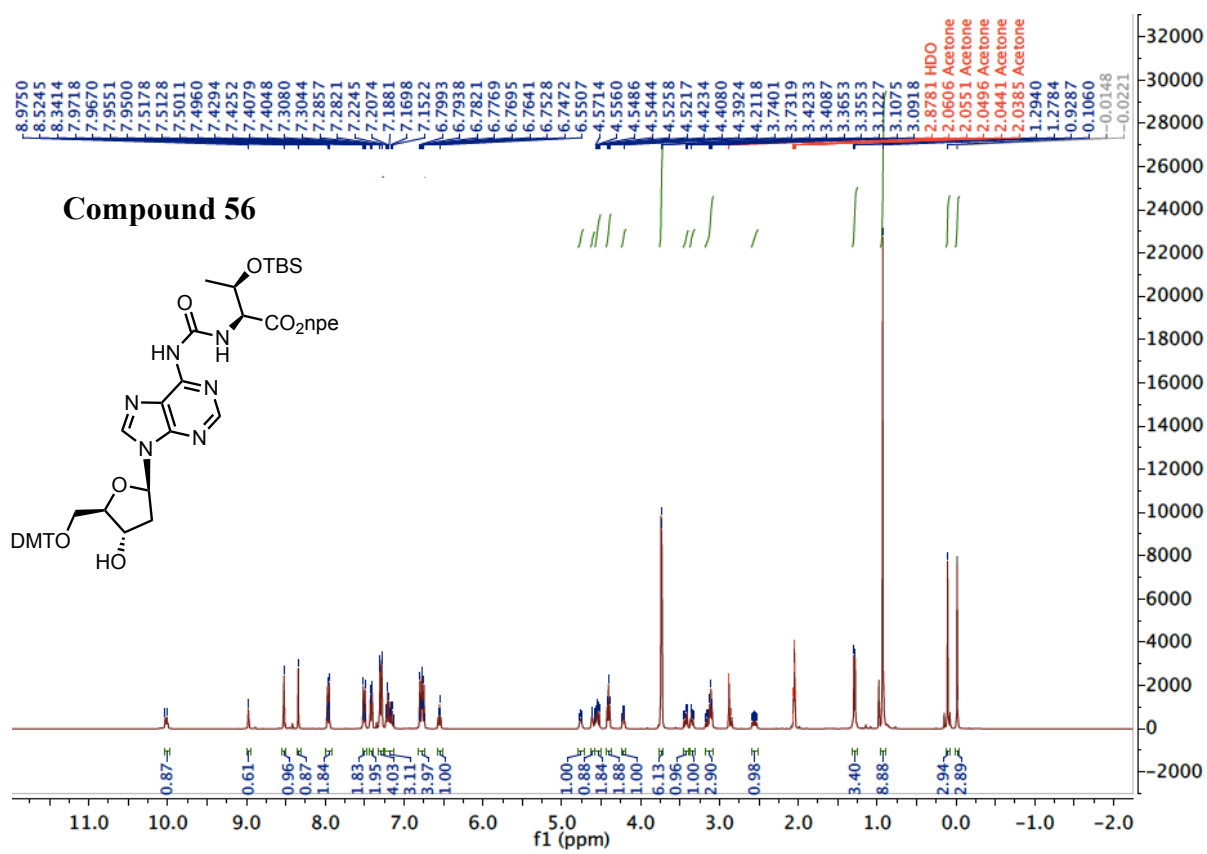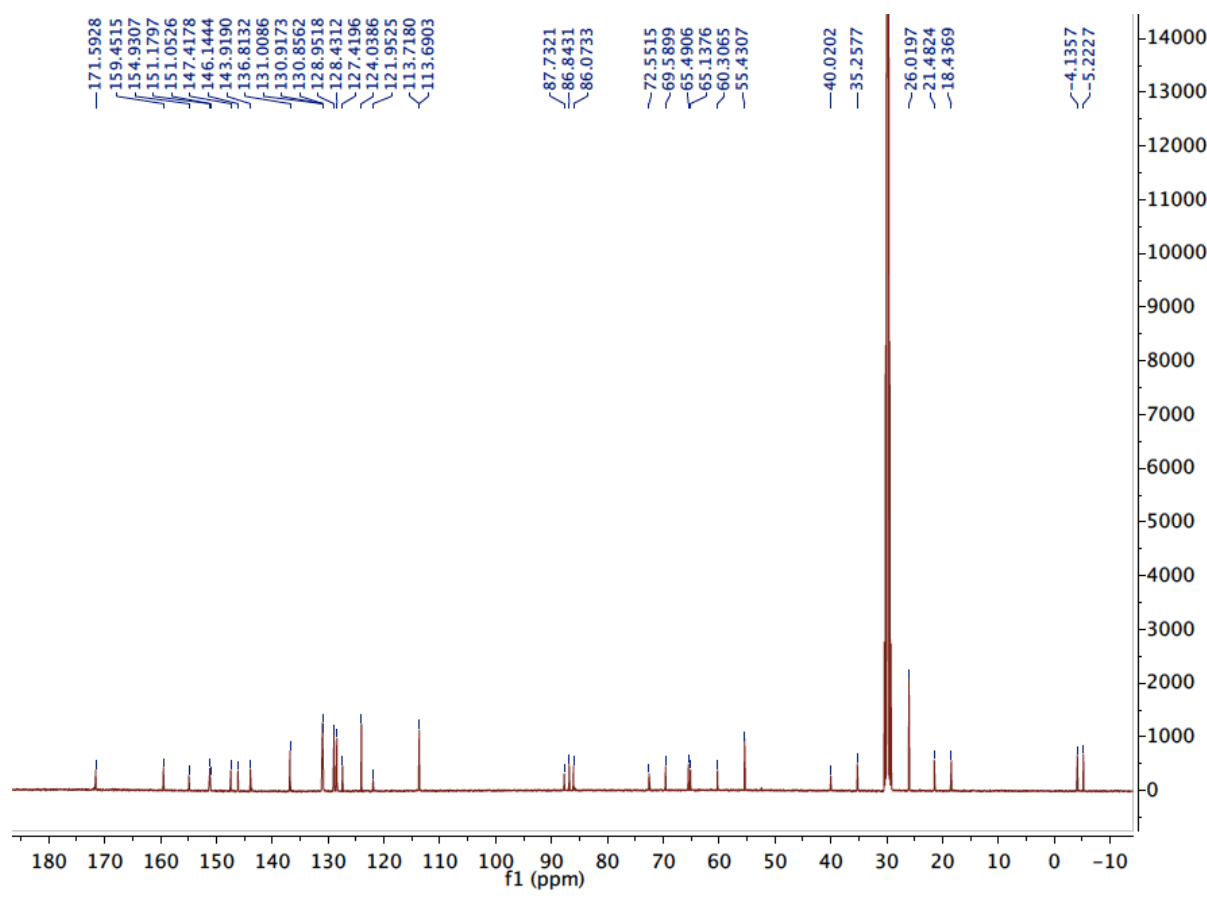

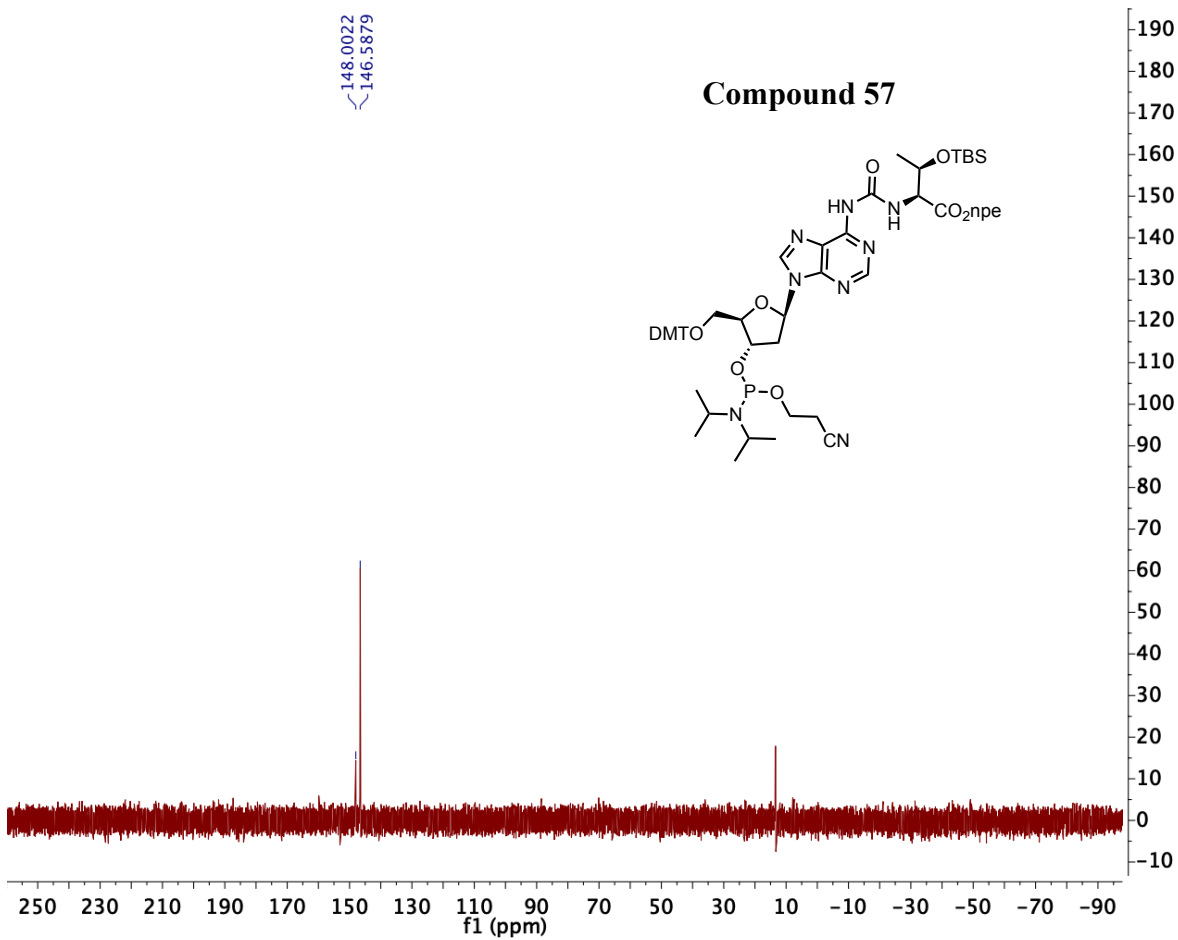



## 6. References

- [1] V. Boudou, J. Langridge, A. Van Aerschot, C. Hendrix, A. Millar, P. Weiss, P. Herdewijn, *Helvetica Chimica Acta* **2000**, *83*, 152 – 161.
- [2] G. Lezczynska, P. Leonczak, A. Dziergowska, A. Malkiewicz, *Nucleosides, Nucleotides and Nucleic Acids* **2013**, *32*, 599 – 616.
- [3] F. Himmelsbach, B. S. Schultz, T. Trichtinger, R. Charubala, W. Pfeleiderer, *Tetrahedron* **1984**, *40*, 59 – 72.
- [4] V. Serebryany, L. Beigelman, *Tetrahedron Lett.* **2002**, *43*, 1983 – 1985.
- [5] E. M. van der Wenden, J. K. von Frijtag Drabbe Künzel, R. A. A. Mathot, M. Danhof, A. P. IJzerman, W. Soudijn, *J. Med. Chem.* **1995**, *38*, 4000-4006.
